# Supplementary material
Source: PubMed Central journal article supplement (PMC2906712)

### Supplementary Figure 1

The bars in the following graphs represent the mean normalized expression of the genes that were tested by real time PCR analysis of the GFRA1-positive cell populations after immunomagnetic cell sorting for each age group (6, 21, 60 days and 8 months). The mean normalized expression and standard error values were multiplied by 1000 and presented on the Y-axis of the graphs in logarithmic scale. Standard errors represent variation between three different RNA isolations. Expression levels of all genes were normalized to beta actin.

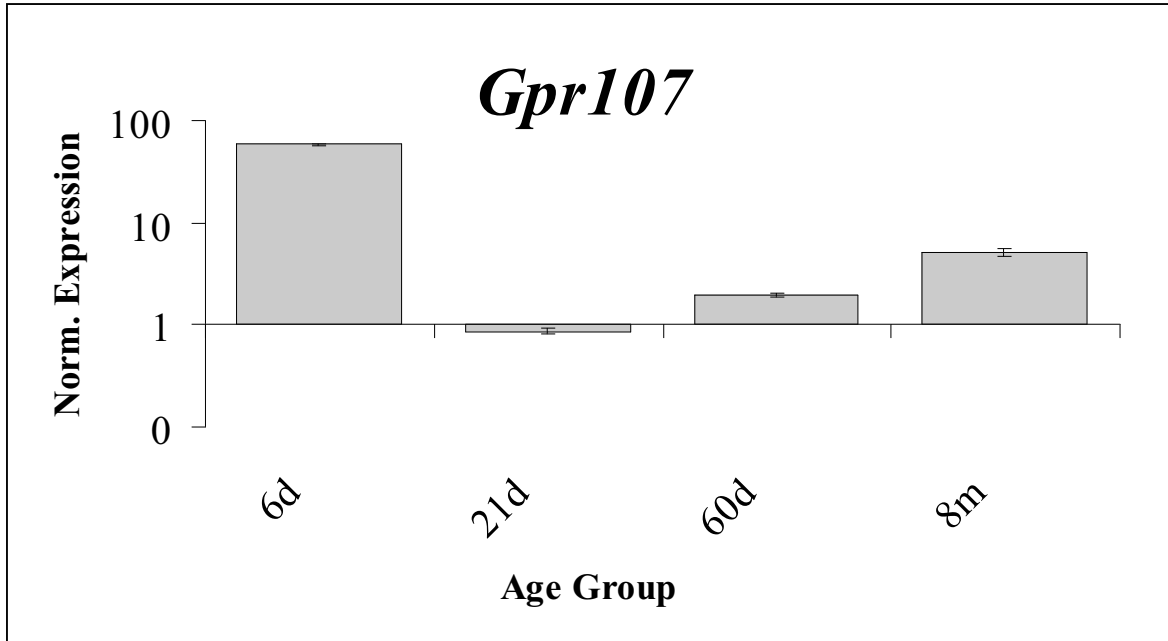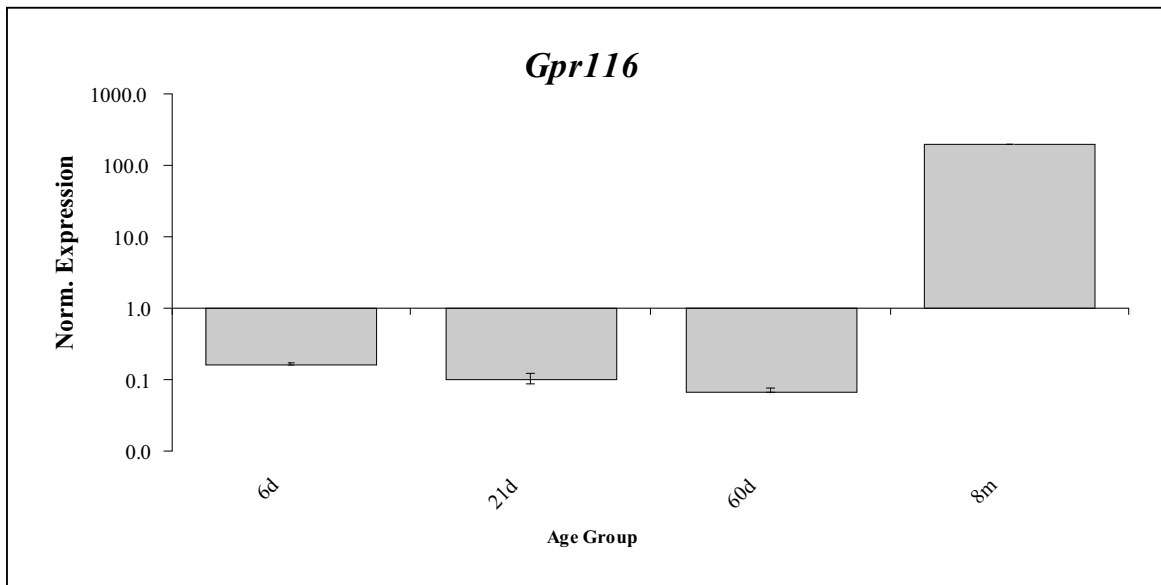

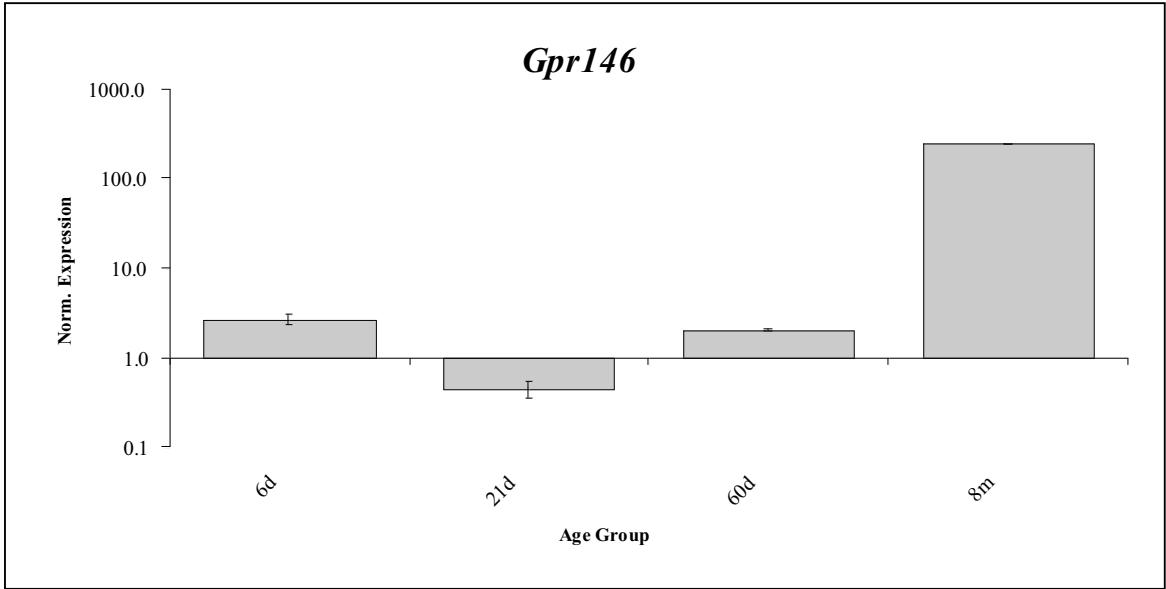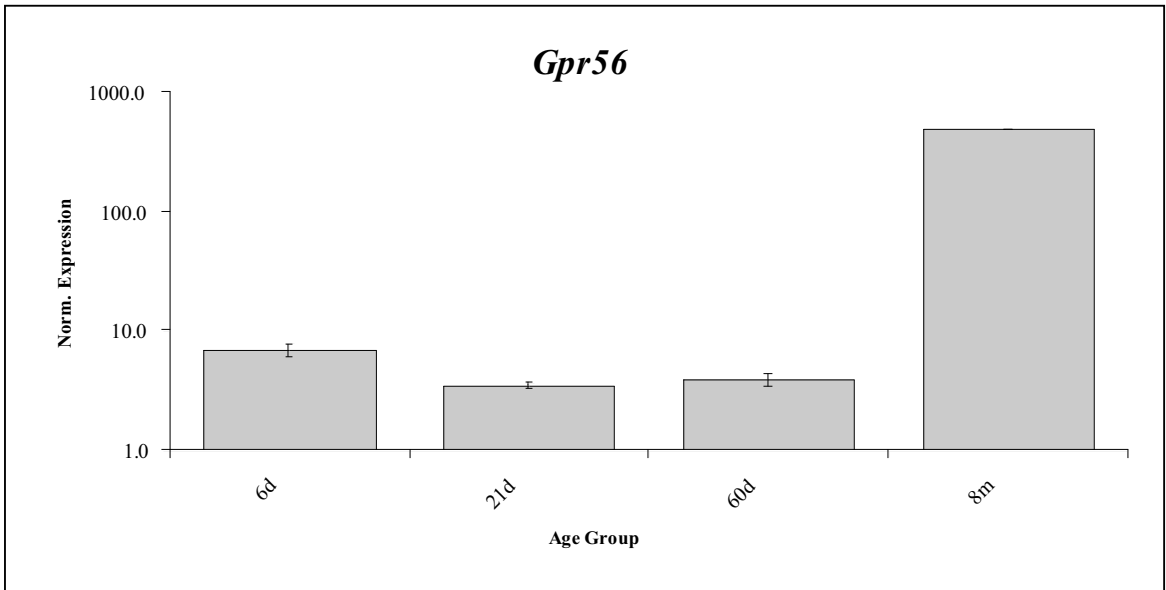

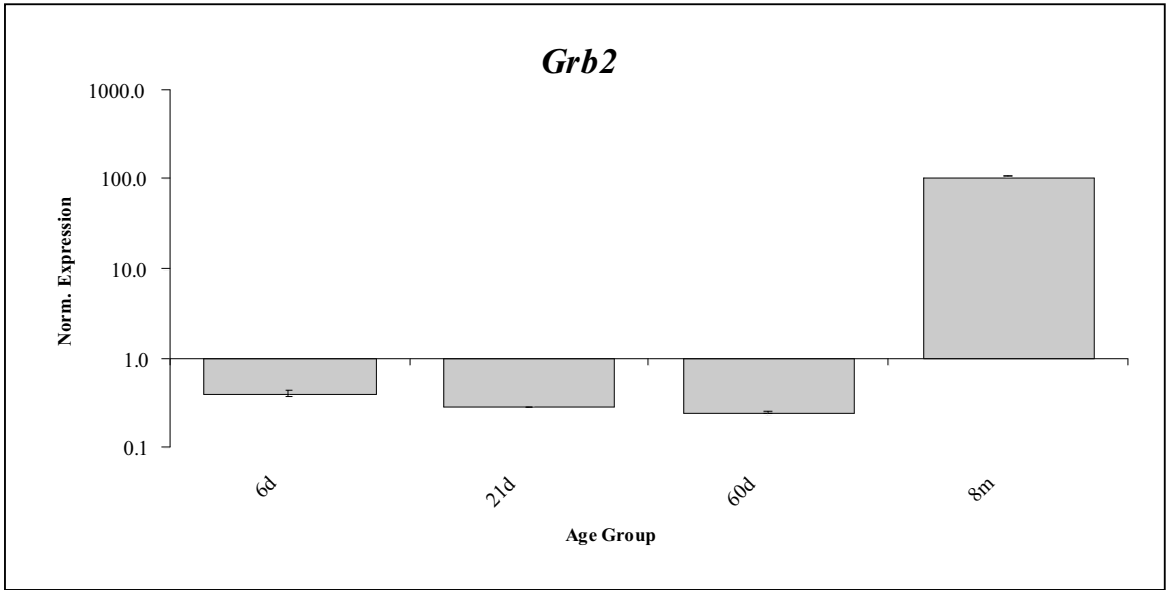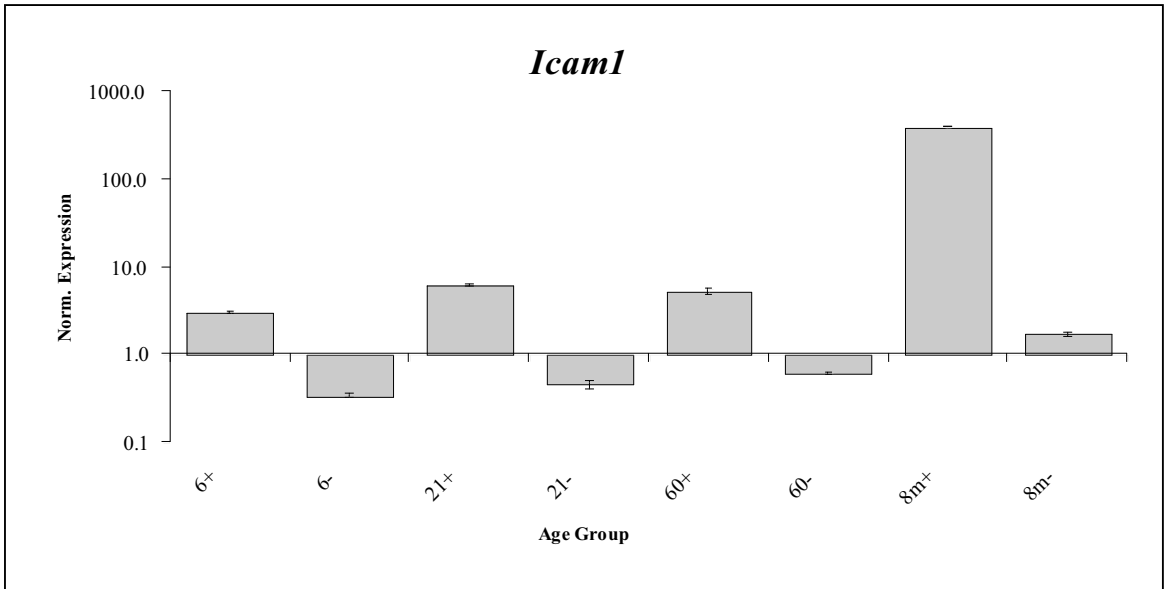

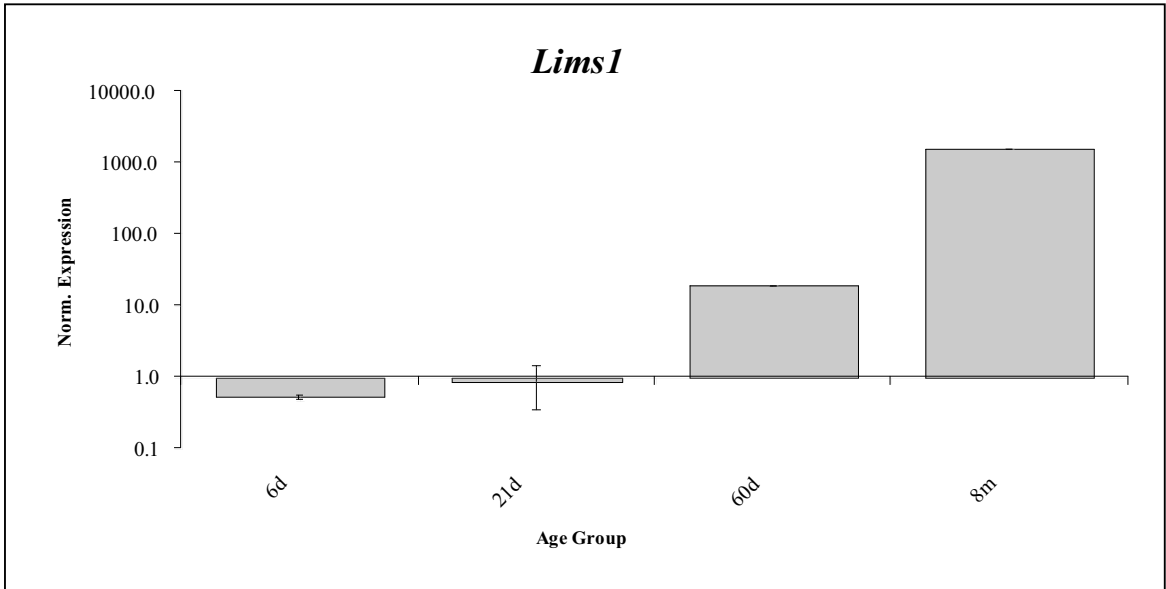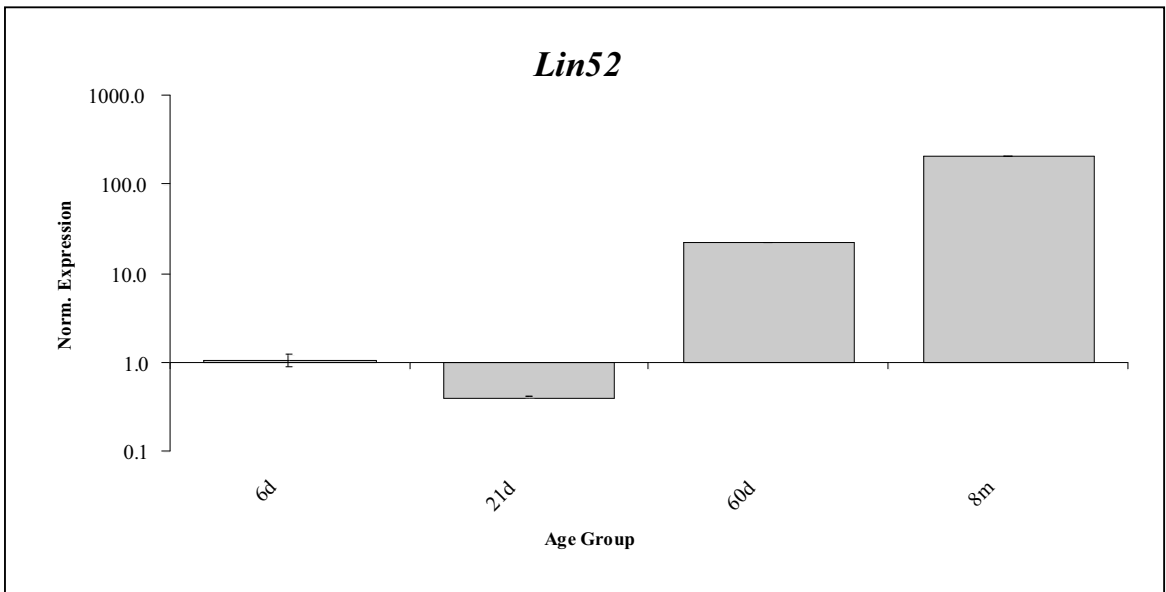

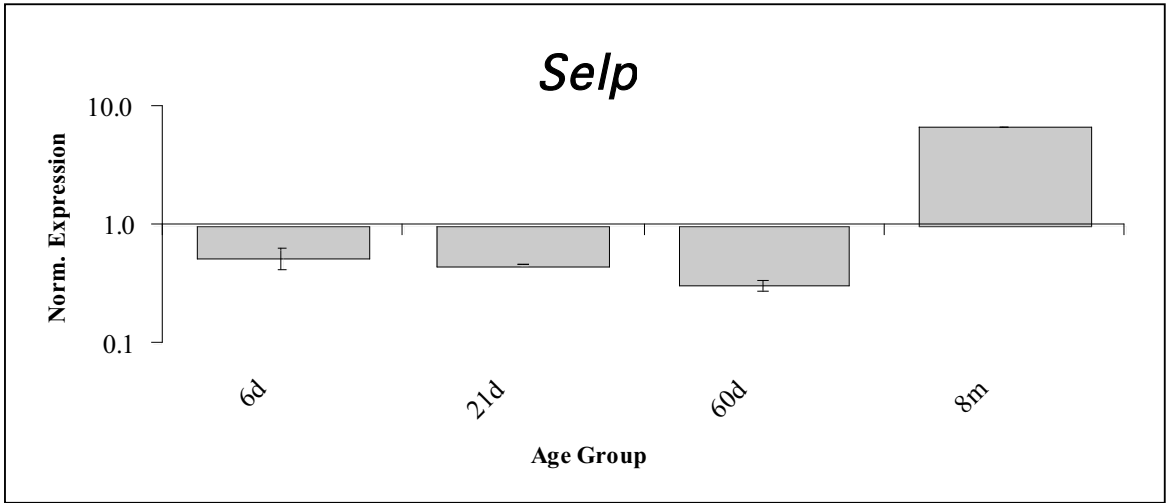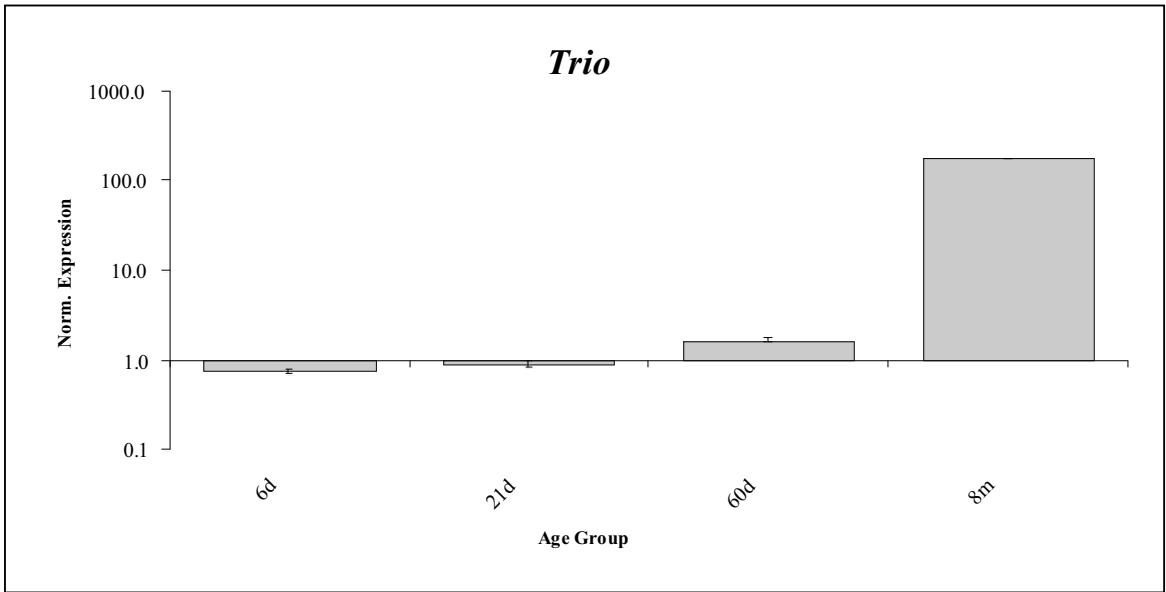

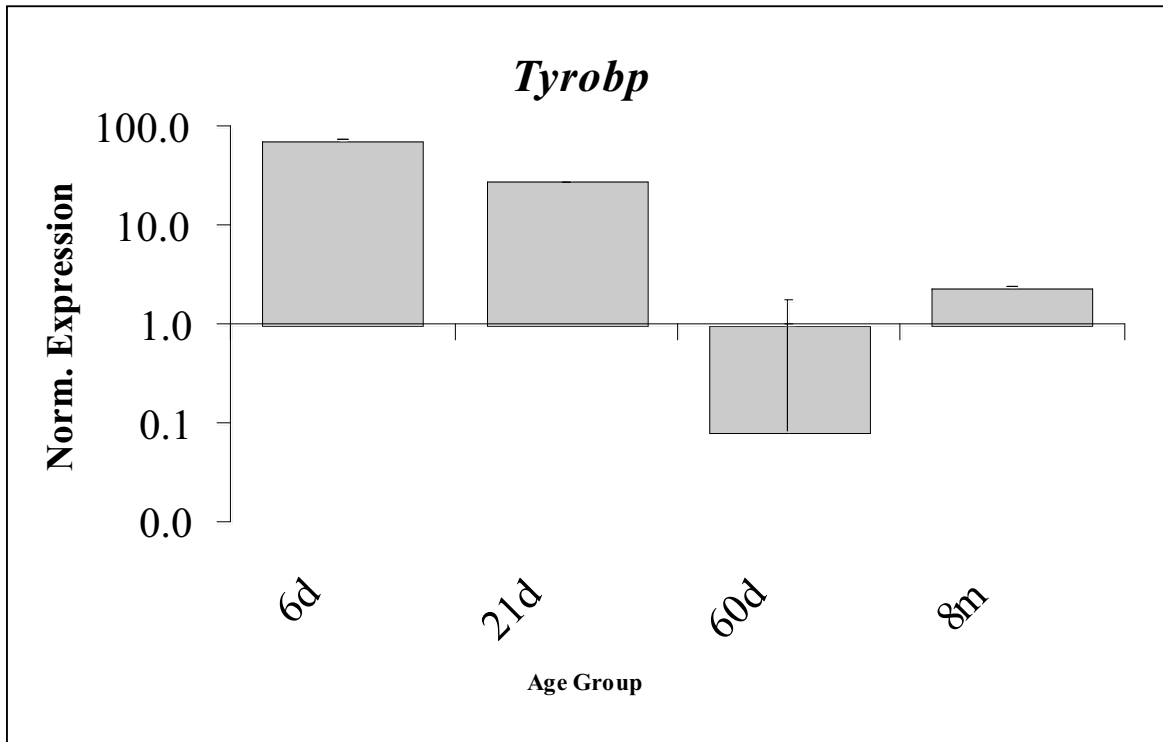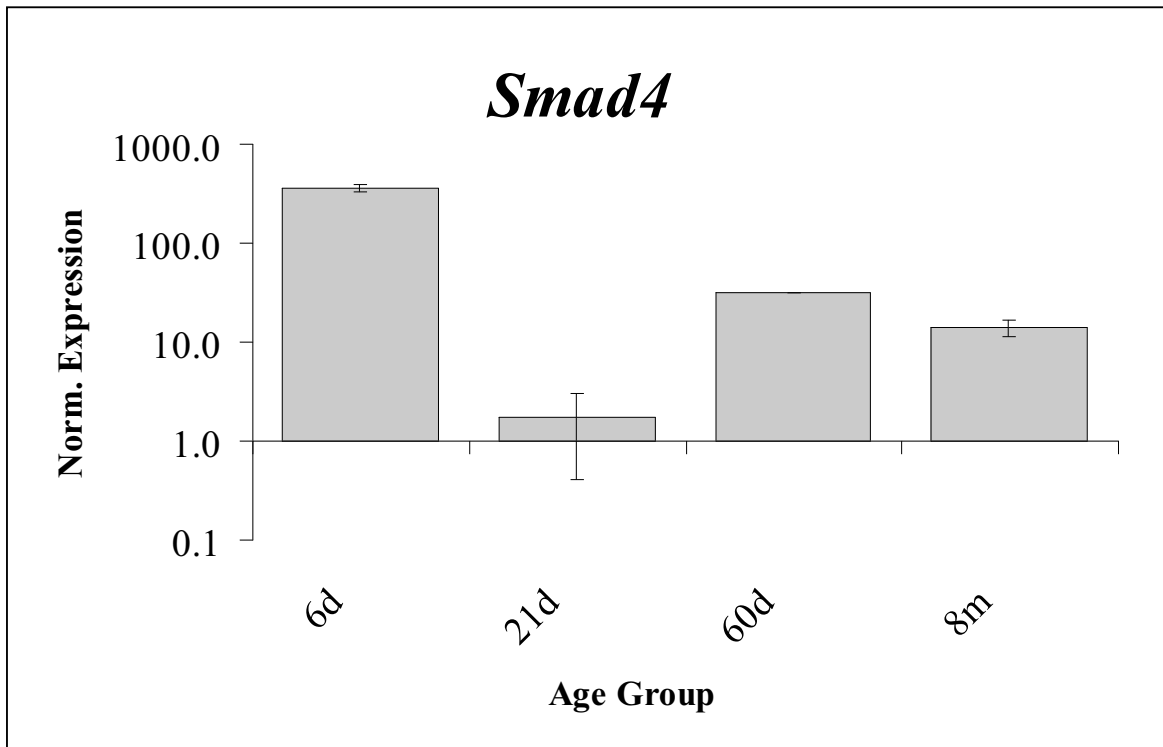

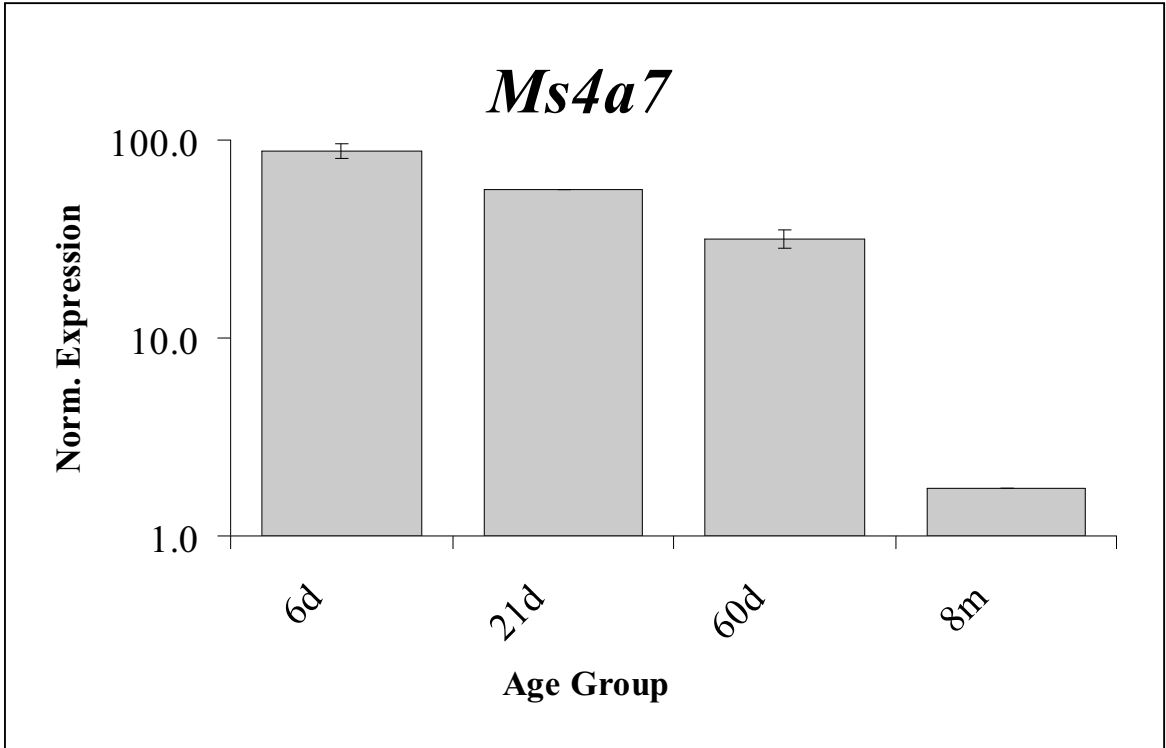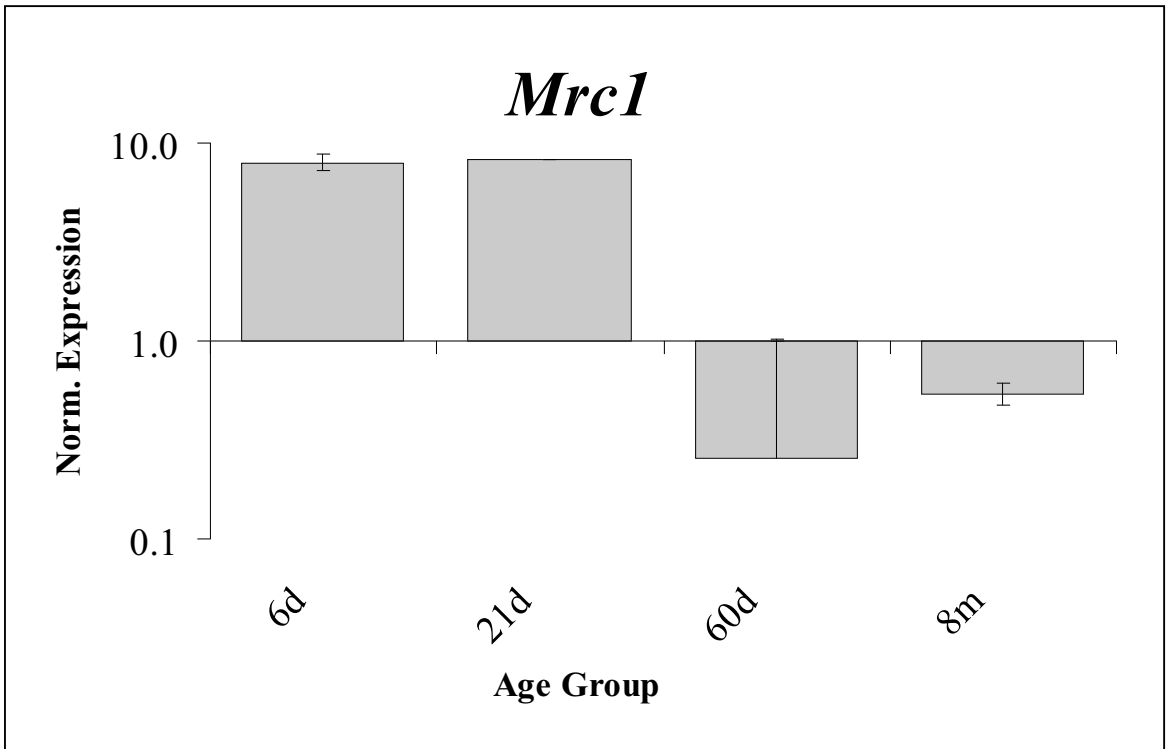

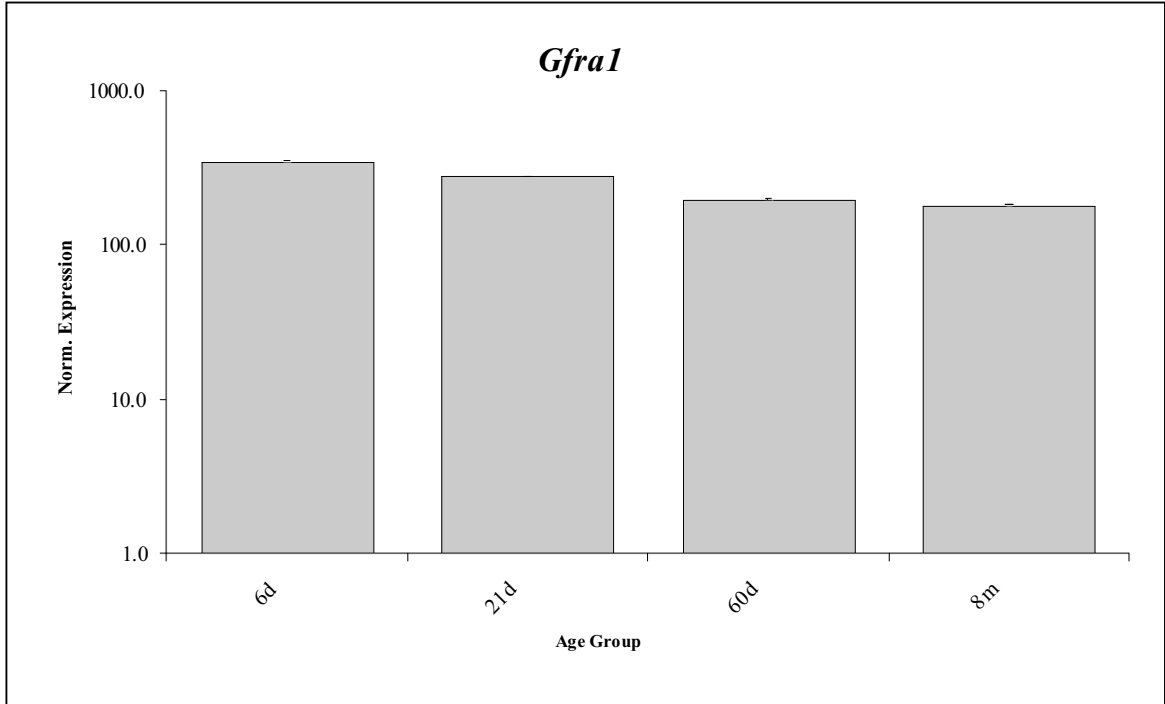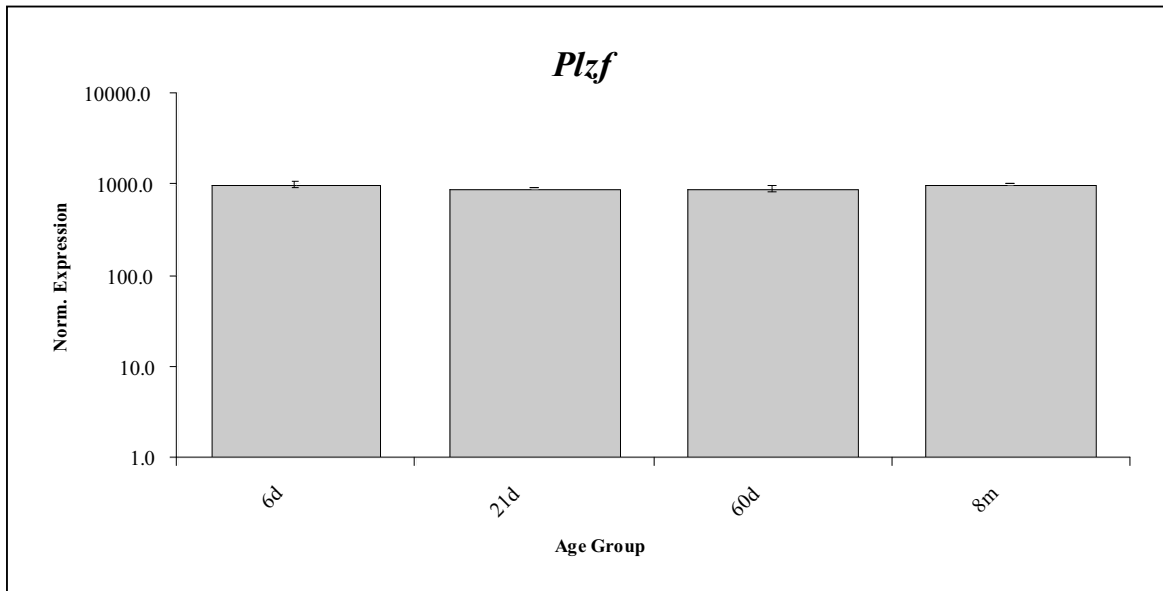



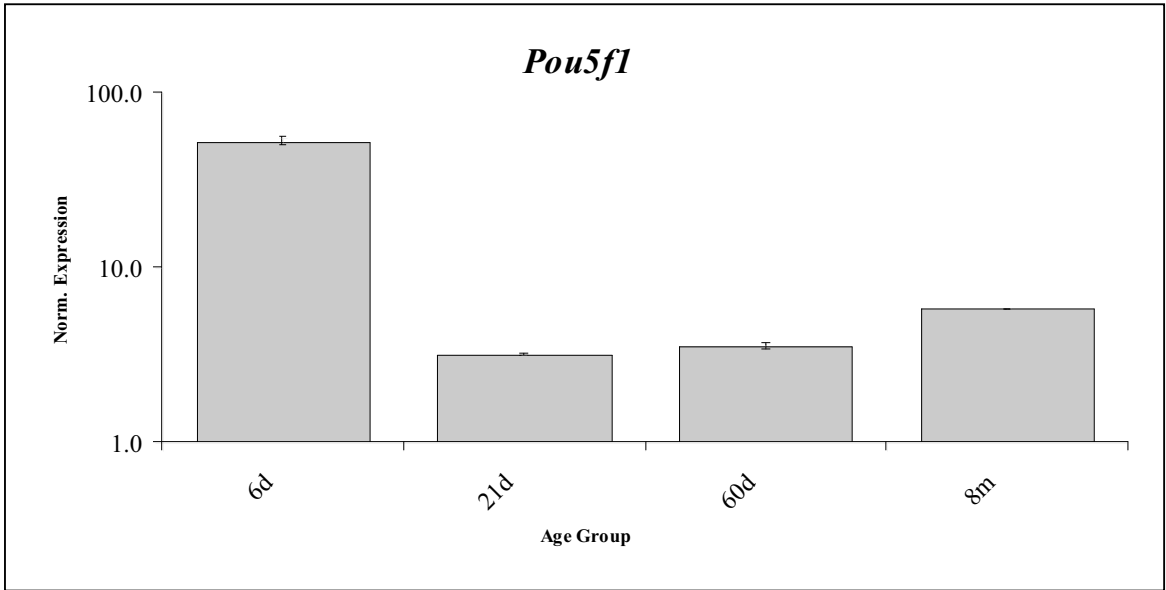

Supplement: NIHMS217597-supplement-Figure_S1.pdf [file NIHMS217597-supplement-Figure_S1.pdf]
