# Supplementary material
Source: PubMed Central journal article supplement (PMC2906712)
Supplement: NIHMS217597-supplement-Table_S1.pdf [file NIHMS217597-supplement-Table_S1.pdf]

**Supplementary Table 1. The sequence of the primers used in qRT-PCR**

| <b>Gene Symbol</b>  | <b>Sequence</b> | <b>Primer</b> | <b>Sequence</b>                 |
|---------------------|-----------------|---------------|---------------------------------|
| Actb                | NM_007393       | F             | TCT TGG GTA TGG AAT CCT GTG GCA |
| Actb                |                 | R             | ACA GCA CTG TGT TGG CAT AGA GGT |
| Grb2                | NM_008163       | F             | GAG CCA AGG CAG AAG AAA TGC TCA |
| Grb2                |                 | R             | TTC CAA ACT TGA CGG ACA GGG AGA |
| Icam1               | NM_010493       | F             | ATT TCT CAT GCC GCA CAG AAC TGG |
| Icam1               |                 | R             | AGC TTT GGG ATG GTA GCT GGA AGA |
| Lims1               | NM_026148       | F             | AAG CCA TGA ACA ACA GCT GGC ATC |
| Lims1               |                 | R             | ATG ACA TGG GCG ACA TAG GTG TCT |
| Selp                | NM_011347       | F             | TGT TTG GCT TCT GGG ATC TGG ACA |
| Selp                |                 | R             | AAG GCA GCA ATT GGG TGC ATA CAG |
| Lin52               | NM_173756       | F             | CGG GAC GGA TTT GGA AGC ATC TTT |
| Lin52               |                 | R             | AGA AGC TGC AAA TTC AGC GAC ACC |
| Trio                | XM_001474968    | F             | GCA TCG CTG TGA ATG ACA TGG GTT |
| Trio                |                 | R             | TGT AGA AGG CGT CGA AGT TGT CCT |
| Gfra1               | NM_010279.2     | F             | ATC AAG AAC AAG CCT CTA GGG CCA |
| Gfra1               |                 | R             | TTG GAT TTC AGC TTC TGT GCC TGC |
| Pou5f1 (aka Oct3/4) | NM_013633       | F             | ATT GAG AAC CGT GTG AGG TGG AGT |
| Pou5f1 (aka Oct3/4) |                 | R             | ACA TCC TTC TCT AGC CCA AGC TGA |
| Zbtb16 (aka Plzf)   | AK040211        | F             | AGC CTT TGT GTG TGA TCA ATG CGG |
| Zbtb16 (aka Plzf)   |                 | R             | TTC CCA CAC AGC AGA CAG AAG ACA |
| Gpr107              | AK030433        | F             | ATT TCG CCC AGC TTC AGA TAA CCC |
| Gpr107              |                 | R             | ATT CTC CAT CAC ACC CGA TGT CGT |
| Gpr146              | NM_001038703    | F             | ACC TTG CAC CTC CCA AAG TAG GAA |
| Gpr146              |                 | R             | TGG GCA CAC ACA CAC GTA CAT AGA |
| Gpr56               | NM_018882       | F             | TAC AAT CTC TAC CGA CTG GTG GTG |
| Gpr56               |                 | R             | CAG AGT GAC CAG GAA GAC AGG AAA |
| Gpr116              | NM_001081178    | F             | ATC AGA AGG TGC AGG AAG CTT TGC |
| Gpr116              |                 | R             | ACG GGT GTT GAC GAA CCT ATG GAT |
| Smad4               | NM_008540       | F             | CACACCTAATTTGCCTCACCACCA        |
| Smad4               |                 | R             | AGGCTGGAATGCAAGCTCATTGTG        |
| Mrc1                | NM_008625       | F             | ACAGTCTGAGTGTACGCAGTGGTT        |
| Mrc1                |                 | R             | ACACAGCTCTTTCCAGGCTCTGAT        |
| Tyrbp               | NM_011662       | F             | TTGGTGTGACTCTGCTGATTGCC         |
| Tyrbp               |                 | R             | CTCAGCAATGTGTTGTTTCCGGGT        |
| Ms4a7               | NM_001025610    | F             | ATTGGAGTGCCTAGTGAAGCCACA        |
| Ms4a7               |                 | R             | GGTTGAAGTAGGAAGCTGACACCA        |
