# Supplementary material
Source: PubMed Central journal article supplement (PMC2906712)
Supplement: NIHMS217597-supplement-Table_S2.pdf [file NIHMS217597-supplement-Table_S2.pdf]

**Supplementary Table 2: Results of microarray gene expression analysis. The numbers indicate the fold changes in gene expression between the GFRA1+ vs GFRA1- cells at each of the age groups. The numbers are the mean value of the two experiments using independently isolated RNA. No value indicates absence of expression.**

| Probeset ID | Gene Title                                          | Gene Symbol   | Fold Changes<br>(GFRA1+ vs GFRA1-) |     |     |    |
|-------------|-----------------------------------------------------|---------------|------------------------------------|-----|-----|----|
|             |                                                     |               | 8mo                                | 60d | 21d | 6d |
| 1445701_at  | ATPase, Ca++ transporting, plasma membrane 4        | Atp2b4        | 33.9                               |     |     |    |
| 1430223_at  | RIKEN cDNA 4930442P07 gene                          | 4930442P07Rik | 33.3                               |     |     |    |
| 1446759_at  | Lin-52 homolog (C. elegans)                         | Lin52         | 31.5                               |     |     |    |
| 1456993_at  | DNA segment, Chr 2, ERATO Doi 640, expressed        | D2Erttd640e   | 26.1                               |     |     |    |
| 1438009_at  | histone cluster 1, H2ac                             | Hist1h2ac     | 24.2                               |     |     |    |
| 1442903_at  | RIKEN cDNA 4732423E21 gene                          | 4732423E21Rik | 23.9                               | 2.4 | 6.7 |    |
| 1430904_at  | ADP-ribosylation factor GTPase activating protein 3 | Arfgap3       | 23.4                               |     |     |    |
| 1443088_at  | RIKEN cDNA 9930031P18 gene                          | 9930031P18Rik | 23.4                               |     |     |    |
| 1457181_at  | DNA segment, Chr 15, Wayne State University 75      | D15Wsu75e     | 23.3                               |     |     |    |
| 1429526_at  | bromodomain containing 8                            | Brd8          | 22.4                               |     |     |    |
| 1429870_at  | TRAF2 and NCK interacting kinase                    | Tnik          | 21.9                               |     |     |    |
| 1459133_at  | ER degradation enhancer, mannosidase alpha-like 3   | Edem3         | 21.2                               |     |     |    |
| 1441381_at  | RIKEN cDNA 9430029E18 gene                          | 9430029E18Rik | 20.7                               |     |     |    |
| 1432757_at  | RIKEN cDNA 2900011L18 gene                          | 2900011L18Rik | 20.2                               |     |     |    |
| 1459326_at  | DNA segment, Chr 9, ERATO Doi 256, expressed        | D9Erttd256e   | 20.2                               |     |     |    |
| 1430043_at  | tetratricopeptide repeat domain 19                  | Ttc19         | 18.1                               |     |     |    |
| 1446761_at  | DNA segment, Chr 8, ERATO Doi 56, expressed         | D8Erttd56e    | 17.7                               |     | 4.4 |    |
| 1438495_at  | topoisomerase (DNA) I                               | Top1          | 17.5                               |     |     |    |
| 1458110_at  | RIKEN cDNA D430030G11 gene                          | D430030G11Rik | 17.5                               |     |     |    |
| 1439587_at  | LEM domain containing 3                             | Lemd3         | 17.4                               |     |     |    |
| 1446443_at  | RIKEN cDNA B230213L16 gene                          | B230213L16Rik | 17.3                               |     |     |    |
| 1458156_at  | RIKEN cDNA E230012J19 gene                          | E230012J19Rik | 17.3                               |     |     |    |
| 1443909_at  | Cleavage stimulation factor, 3' pre-RNA, subunit 3  | Cstf3         | 17.0                               |     |     |    |
| 1457760_at  | RIKEN cDNA A930004J17 gene                          | A930004J17Rik | 16.9                               |     |     |    |
| 1445104_at  | RIKEN cDNA E230029C05 gene                          | E230029C05Rik | 16.8                               |     |     |    |
| 1438127_at  | hypothetical LOC552906                              | LOC552906     | 16.8                               |     |     |    |
| 1459965_at  | Dyslexia susceptibility 1 candidate 1 (human)       | Dyx1c1        | 16.8                               |     |     |    |
| 1458469_at  | Casitas B-lineage lymphoma b                        | Cblb          | 16.7                               |     |     |    |
| 1442945_at  | RIKEN cDNA 2010109K09 gene                          | 2010109K09Rik | 16.3                               |     |     |    |
| 1439349_at  | strawberry notch homolog 2 (Drosophila)             | Sbno2         | 16.3                               | 2.1 | 4.0 |    |
| 1441030_at  | retinoic acid induced 14                            | Rai14         | 16.0                               |     |     |    |
| 1442586_at  | suppressor of cytokine signaling 2                  | Socs2         | 15.8                               |     |     |    |
| 1439582_at  | Microtubule-actin crosslinking factor 1             | Macf1         | 15.8                               |     |     |    |
| 1442845_at  | RIKEN cDNA C130075A20 gene                          | C130075A20Rik | 15.7                               |     |     |    |
| 1443535_at  | RAB GTPase activating protein 1                     | Rabgap1       | 15.4                               |     |     |    |
| 1432758_at  | RIKEN cDNA 2900011L18 gene                          | 2900011L18Rik | 15.2                               |     |     |    |
| 1436898_at  | splicing factor proline/glutamine rich              | Sfpq          | 15.2                               |     |     |    |
| 1432741_at  | RIKEN cDNA 9530071P10 gene                          | 9530071P10Rik | 14.4                               |     |     |    |
| 1456964_at  | RNA binding motif protein 12                        | Rbm12         | 14.3                               |     |     |    |
| 1458161_at  | KCNQ1 overlapping transcript 1                      | Kcnq1ot1      | 14.1                               |     |     |    |
| 1428833_at  | RIKEN cDNA 4930406D14 gene                          | 4930406D14Rik | 14.1                               |     |     |    |
| 1440609_at  | mitogen-activated protein kinase 4                  | Map4k4        | 14.0                               |     |     |    |

| Probeset ID  | Gene Title                                             | Gene Symbol        | 8mo  | 60d | 21d  | 6d |
|--------------|--------------------------------------------------------|--------------------|------|-----|------|----|
| 1440609_at   | mitogen-activated protein kinase 4                     | Map4k4             | 14.0 |     |      |    |
| 1444373_at   | T-cell lymphoma invasion and metastasis 1              | Tiam1              | 13.9 |     |      |    |
| 1439520_at   | denticleless homolog (Drosophila)                      | Dtl                | 13.9 |     |      |    |
| 1460261_at   | discs, large homolog 4 (Drosophila)                    | Dlg4               | 13.8 |     |      |    |
| 1447526_at   | DNA segment, Chr 5, ERATO Doi 255, expressed           | D5Erd255e          | 13.8 |     |      |    |
| 1449370_at   | SRY-box containing gene 4                              | Sox4               | 13.8 |     |      |    |
| 1441145_at   | PHD finger protein 21A                                 | Phf21a             | 13.7 |     |      |    |
| 1430089_at   | RIKEN cDNA 5830469G19 gene                             | 5830469G19Rik      | 13.6 |     |      |    |
| 1456526_at   | RIKEN cDNA C130034I24 gene                             | C130034I24Rik      | 13.6 |     |      |    |
| 1430566_at   | RIKEN cDNA 4733401A01 gene                             | 4733401A01Rik      | 13.5 |     |      |    |
| 1441465_at   | CCR4-NOT transcription complex, subunit 3              | Cnot3              | 13.4 |     |      |    |
| 1442111_at   | RIKEN cDNA D430033H22 gene                             | D430033H22Rik      | 13.4 |     |      |    |
| 1424475_at   | calcium/calmodulin-dependent protein kinase 2, beta    | Camkk2             | 13.4 |     |      |    |
| 1446363_at   | predicted gene, ENSMUSG00000055419                     | ENSMUSG00000055419 | 13.3 |     |      |    |
| 1457062_at   | RIKEN cDNA 1700081L11 gene                             | 1700081L11Rik      | 13.1 |     |      |    |
| 1458128_at   | RIKEN cDNA 1110028C15 gene                             | 1110028C15Rik      | 12.9 |     |      |    |
| 1437704_at   | RIKEN cDNA 2900024O10 gene                             | 2900024O10Rik      | 12.8 |     |      |    |
| 1458768_at   | expressed sequence C79946                              | C79946             | 12.8 |     |      |    |
| 1440307_at   | general transcription factor IIIC, polypeptide 2, beta | Gtf3c2             | 12.8 |     |      |    |
| 1441630_at   | E1A binding protein p400                               | Ep400              | 12.7 |     |      |    |
| 1444482_at   | RIKEN cDNA A130078K24 gene                             | A130078K24Rik      | 12.7 |     |      |    |
| 1429900_at   | RIKEN cDNA 5330406M23 gene                             | 5330406M23Rik      | 12.7 |     | 14.7 |    |
| 1444321_at   | Proteasome 26S subunit, non-ATPase, 9                  | Psm9               | 12.7 |     |      |    |
| 1444321_at   | Proteasome 26S subunit, non-ATPase, 9                  | Psm9               | 12.7 |     |      |    |
| 1441840_x_at | Strawberry notch homolog 2 (Drosophila)                | Sbno2              | 12.6 |     |      |    |
| 1443252_at   | ring finger protein 144B                               | Rnf144b            | 12.6 |     |      |    |
| 1446117_at   | spire homolog 1 (Drosophila)                           | Spire1             | 12.6 |     |      |    |
| 1446750_at   | imprinted and ancient                                  | Impact             | 12.4 |     |      |    |
| 1446509_at   | spermine oxidase                                       | Smox               | 12.4 |     |      |    |
| 1458553_at   | plasminogen activator, tissue                          | Plat               | 12.4 |     |      |    |
| 1440083_at   | RIKEN cDNA A430061O12 gene                             | A430061O12Rik      | 12.3 |     |      |    |
| 1429810_at   | RIKEN cDNA 4921505C17 gene                             | 4921505C17Rik      | 12.3 |     |      |    |
| 1430042_at   | RIKEN cDNA A930012M21 gene                             | A930012M21Rik      | 12.3 |     |      |    |
| 1441319_at   | RNA binding motif protein 5                            | Rbm5               | 12.2 |     |      |    |
| 1442107_at   | filamin, beta                                          | Flnb               | 12.2 |     |      |    |
| 1453322_at   | WD repeat domain 33                                    | Wdr33              | 12.1 |     |      |    |
| 1438443_at   | zinc finger and BTB domain containing 20               | Zbtb20             | 12.1 |     |      |    |
| 1442018_at   | expressed sequence AI426953                            | AI426953           | 12.0 |     |      |    |
| 1453507_at   | methyl-CpG binding domain protein 5                    | Mbd5               | 11.9 |     |      |    |
| 1440604_at   | Riken cDNA 8030494B02 gene                             | 8030494B02Rik      | 11.9 |     |      |    |
| 1430357_at   | H3 histone, family 3B                                  | H3f3b              | 11.9 |     |      |    |
| 1459353_at   | potassium channel tetramerisation domain 3             | Kctd3              | 11.8 |     |      |    |
| 1450971_at   | growth arrest and DNA-damage-inducible 45 beta         | Gadd45b            | 11.8 |     |      |    |
| 1447670_at   | proteasome 26S subunit, non-ATPase, 9                  | Psm9               | 11.8 |     |      |    |
| 1447670_at   | proteasome26S subunit, non-ATPase, 9                   | Psm9               | 11.8 |     |      |    |
| 1439081_at   | meningioma expressed antigen 5 (hyaluronidase)         | Mgea5              | 11.7 |     |      |    |

| Probeset ID  | Gene Title                                              | Gene Symbol   | 8mo  | 60d | 21d | 6d |
|--------------|---------------------------------------------------------|---------------|------|-----|-----|----|
| 1439687_at   | RAB14, member RAS oncogene family                       | Rab14         | 11.7 |     |     |    |
| 1442528_at   | exportin 4                                              | Xpo4          | 11.6 |     |     |    |
| 1433005_at   | RIKEN cDNA 4833446E11 gene                              | 4833446E11Rik | 11.6 |     |     |    |
| 1443159_at   | RIKEN cDNA 9130221J17 gene                              | 9130221J17Rik | 11.3 |     |     |    |
| 1458665_at   | Chloride intracellular channel 1                        | Clic1         | 11.3 |     |     |    |
| 1446185_at   | FK506 binding protein                                   | Frap1         | 11.3 |     |     |    |
| 1433369_at   | RIKEN cDNA 8430401P03 gene                              | 8430401P03Rik | 11.2 |     |     |    |
| 1456350_at   | zinc finger protein 451                                 | Zfp451        | 11.2 |     |     |    |
| 1430448_at   | RIKEN cDNA 6720418B01 gene                              | 6720418B01Rik | 11.2 |     |     |    |
| 1457264_at   | PHD finger protein 20-like 1                            | Phf20I1       | 11.2 |     |     |    |
| 1443188_at   | ubiquitin-conjugating enzyme E2W (putative)             | Ube2w         | 11.1 |     |     |    |
| 1430033_at   | RIKEN cDNA 5330431K02 gene                              | 5330431K02Rik | 11.1 |     |     |    |
| 1430458_at   | suppressor of Ty 6 homolog (S. cerevisiae)              | Supt6h        | 11.1 |     |     |    |
| 1457488_at   | RIKEN cDNA B230339M05 gene                              | B230339M05Rik | 11.1 |     |     |    |
| 1439800_at   | CAP-GLY domain containing linker protein 1              | Clip1         | 11.0 |     |     |    |
| 1457111_at   | expressed sequence AA415038                             | AA415038      | 11.0 |     |     |    |
| 1457806_at   | RIKEN cDNA B830028B13 gene                              | B830028B13Rik | 10.9 |     |     |    |
| 1457243_at   | RIKEN cDNA 1110032O16 gene                              | 1110032O16Rik | 10.9 |     |     |    |
| 1448605_at   | ras homolog gene family, member C                       | Rhoc          | 10.8 |     |     |    |
| 1441033_at   | transmembrane and tetratricopeptide repeat containing 2 | Tmtc2         | 10.8 |     |     |    |
| 1458524_at   | fibronectin type III domain containing 3a               | Fndc3a        | 10.8 |     |     |    |
| 1442416_at   | hypothetical protein D930001B02                         | D930001B02    | 10.8 |     |     |    |
| 1443000_at   | DNA segment, Chr 3, ERATO Doi 300, expressed            | D3Erttd300e   | 10.7 |     |     |    |
| 1445340_at   | MYC binding protein 2                                   | Mycbp2        | 10.7 |     |     |    |
| 1441445_at   | period homolog 3 (Drosophila)                           | Per3          | 10.6 |     |     |    |
| 1443415_at   | RIKEN cDNA 4931432P07 gene                              | 4931432P07Rik | 10.6 |     |     |    |
| 1429469_at   | RIKEN cDNA A930013F10 gene                              | A930013F10Rik | 10.6 |     |     |    |
| 1437638_at   | serine/arginine repetitive matrix 2                     | Srrm2         | 10.5 |     |     |    |
| 1437001_at   | glycogen synthase kinase 3 beta                         | Gsk3b         | 10.5 |     |     |    |
| 1457947_at   | DEAD (Asp-Glu-Ala-Asp) box polypeptide 49               | Ddx49         | 10.5 |     |     |    |
| 1441992_at   | RAB14, member RAS oncogene family                       | Rab14         | 10.5 |     |     |    |
| 1430180_at   | mitogen-activated protein kinase kinase 5               | Map2k5        | 10.5 |     |     |    |
| 1433203_at   | RIKEN cDNA 6030400A10 gene                              | 6030400A10Rik | 10.3 | 2.2 | 5.3 |    |
| 1454213_at   | armadillo repeat containing 9                           | Armc9         | 10.3 |     |     |    |
| 1445363_at   | RIKEN cDNA 2810055G20 gene                              | 2810055G20Rik | 10.3 |     |     |    |
| 1446643_at   | RIKEN cDNA 5330409N07 gene                              | 5330409N07Rik | 10.2 |     |     |    |
| 1440346_at   | Jumonji domain containing 3                             | Jmjd3         | 10.2 |     |     |    |
| 1440764_at   | v-raf murine sarcoma 3611 viral oncogene homolog        | Araf          | 10.2 |     |     |    |
| 1446288_at   | expressed sequence C78692                               | C78692        | 10.1 |     |     |    |
| 1459209_at   | Ring finger protein 10                                  | Rnf10         | 10.0 |     |     |    |
| 1438674_a_at | splicing factor, arginine/serine-rich 8                 | Sfrs8         | 10.0 |     |     |    |
| 1454536_at   | transmembrane protein 30C                               | Tmem30c       | 10.0 |     |     |    |
| 1447184_at   | expressed sequence AU021760                             | AU021760      | 10.0 |     |     |    |
| 1435561_at   | Ets2 repressor factor                                   | Erf           | 10.0 |     |     |    |
| 1458969_at   | expressed sequence AU019559                             | AU019559      | 10.0 |     |     |    |
| 1438060_at   | neuronal PAS domain protein 3                           | Npas3         | 9.9  |     |     |    |

| Probeset ID  | Gene Title                                              | Gene Symbol             | 8mo | 60d | 21d | 6d |
|--------------|---------------------------------------------------------|-------------------------|-----|-----|-----|----|
| 1420164_at   | DNA segment, Chr 7, ERATO Doi 183, expressed            | D7Ertd183e              | 9.9 |     |     |    |
| 1439544_at   | TBC1 domain family, member 5                            | Tbc1d5                  | 9.9 |     |     |    |
| 1445068_at   | mucosa associated lymphoma translocation 1              | Malt1                   | 9.9 |     |     |    |
| 1449755_at   | DNA segment, Chr 7, ERATO Doi 183, expressed            | D7Ertd183e              | 9.9 |     |     |    |
| 1443772_at   | DAZ interacting protein 1                               | Dzip1                   | 9.8 |     |     |    |
| 1438129_at   | WD repeat and SOCS box-containing 2                     | Wsb2                    | 9.8 |     |     |    |
| 1429963_at   | mitogen-activated protein kinase 6                      | Mapk6                   | 9.7 |     |     |    |
| 1425673_at   | LIM domain containing preferred translocation partner   | Lpp                     | 9.7 |     |     |    |
| 1424474_a_at | calcium/calmodulin-dependent protein kinase kinase 2    | Camkk2                  | 9.7 |     |     |    |
| 1443184_at   | CDC14 cell division cycle 14 homolog A (S. cerevisiae)  | Cdc14a /// LOC100047731 | 9.6 |     |     |    |
| 1454030_at   | SAPS domain family, member 3                            | Saps3                   | 9.6 |     |     |    |
| 1457064_at   | RIKEN cDNA D030002E05 gene                              | D030002E05Rik           | 9.6 |     |     |    |
| 1456689_at   | Ring finger protein 10                                  | Rnf10                   | 9.6 |     |     |    |
| 1448868_at   | SCAN domain-containing 1                                | Scand1                  | 9.4 |     |     |    |
| 1438460_at   | zinc finger, MYM-type 4                                 | Zmym4                   | 9.4 |     |     |    |
| 1430622_at   | RIKEN cDNA 4833423F13 gene                              | 4833423F13Rik           | 9.4 |     |     |    |
| 1433598_at   | arginine and glutamate rich 1                           | Arglu1                  | 9.4 |     |     |    |
| 1433198_at   | RIKEN cDNA 4930445B03 gene                              | 4930445B03Rik           | 9.3 |     |     |    |
| 1444706_at   | Mus musculus, clone IMAGE:6441811, mRNA                 | ---                     | 9.3 |     |     |    |
| 1456105_at   | ring finger and CCCH-type zinc finger domains 2         | Rc3h2                   | 9.3 |     |     |    |
| 1453311_at   | RIKEN cDNA 2310008B10 gene                              | 2310008B10Rik           | 9.2 |     |     |    |
| 1459961_a_at | Signal transducer and activator of transcription 3      | Stat3                   | 9.2 |     |     |    |
| 1431248_at   | RIKEN cDNA 5031426D15 gene                              | 5031426D15Rik           | 9.1 |     |     |    |
| 1438516_at   | Rap1 interacting factor 1 homolog (yeast)               | Rif1                    | 9.1 |     |     |    |
| 1452498_at   | Mus musculus, clone IMAGE:3595120, mRNA                 | ---                     | 9.1 |     |     |    |
| 1456972_at   | expressed sequence C80256                               | C80256                  | 9.0 |     |     |    |
| 1422125_at   | 5-hydroxytryptamine (serotonin) receptor 2B             | Htr2b                   | 9.0 |     |     |    |
| 1453740_a_at | cyclin L2                                               | Ccnl2                   | 9.0 |     |     |    |
| 1433757_a_at | nischarin                                               | Nisch                   | 9.0 |     |     |    |
| 1440751_at   | E1A binding protein p400                                | Ep400                   | 8.9 |     |     |    |
| 1436767_at   | LUC7-like 2 (S. cerevisiae)                             | Luc7l2                  | 8.9 |     |     |    |
| 1434759_at   | leucine rich repeat transmembrane neuronal 3            | Lrrtm3                  | 8.9 |     |     |    |
| 1437789_at   | baculoviral IAP repeat-containing 6                     | Birc6                   | 8.9 |     |     |    |
| 1444814_at   | DNA segment, Chr 15, ERATO Doi 180, expressed           | D15Ertd180e             | 8.8 |     |     |    |
| 1442511_at   | importin 7                                              | Ipo7                    | 8.8 |     |     |    |
| 1424922_a_at | bromodomain containing 4                                | Brd4                    | 8.8 |     |     |    |
| 1454286_at   | RIKEN cDNA 1110004M10 gene                              | 1110004M10Rik           | 8.7 |     |     |    |
| 1438828_at   | Rap guanine nucleotide exchange factor (GEF) 6          | Rapgef6                 | 8.7 |     |     |    |
| 1444330_at   | DNA segment, Chr 2, ERATO Doi 173, expressed            | D2Ertd173e              | 8.7 |     |     |    |
| 1443426_at   | SAFB-like, transcription modulator                      | Sltm                    | 8.7 |     |     |    |
| 1441196_at   | RIKEN cDNA C230076A16 gene                              | C230076A16Rik           | 8.7 |     |     |    |
| 1447415_at   | B double prime 1, subunit of RNA polymerase III         | Bdp1                    | 8.7 |     |     |    |
| 1447415_at   | B double prime 1, subunit of RNA polymerase III         | Bdp1                    | 8.7 |     |     |    |
| 1457294_at   | Transmembrane and tetratricopeptide repeat containing 3 | Tmtc3                   | 8.6 |     |     |    |
| 1437543_at   | far upstream element (FUSE) binding protein 1           | Fubp1                   | 8.6 |     |     |    |
| 1432627_at   | RIKEN cDNA 5730507A11 gene                              | 5730507A11Rik           | 8.6 |     |     |    |

| Probeset ID  | Gene Title                                                | Gene Symbol   | 8mo | 60d | 21d | 6d |
|--------------|-----------------------------------------------------------|---------------|-----|-----|-----|----|
| 1456429_at   | mucosa associated lymphoma translocation gene 1           | Malt1         | 8.6 |     |     |    |
| 1425223_at   | baculoviral IAP repeat-containing 3                       | Birc3         | 8.6 |     |     |    |
| 1430103_at   | RIKEN cDNA 9030607L20 gene                                | 9030607L20Rik | 8.5 |     |     |    |
| 1438831_at   | Cdc2-related kinase, arginine/serine-rich                 | Crks          | 8.5 |     |     |    |
| 1432626_at   | RIKEN cDNA 5730507A11 gene                                | 5730507A11Rik | 8.4 |     |     |    |
| 1433366_at   | RIKEN cDNA 6030458A19 gene                                | 6030458A19Rik | 8.4 |     |     |    |
| 1443747_at   | DNA segment, Chr 3, ERATO Doi 300, expressed              | D3Erdt300e    | 8.4 |     |     |    |
| 1429487_at   | protein phosphatase 1, regulatory (inhibitor) subunit 12A | Ppp1r12a      | 8.4 |     |     |    |
| 1439933_at   | RIKEN cDNA B430316J06 gene                                | B430316J06Rik | 8.4 |     |     |    |
| 1441185_at   | Musashi homolog 2 (Drosophila)                            | Msi2          | 8.3 |     |     |    |
| 1437074_at   | sorting nexin 5                                           | Snx5          | 8.3 |     |     |    |
| 1458996_at   | integrin alpha 5 (fibronectin receptor alpha)             | Itga5         | 8.3 |     |     |    |
| 1457565_at   | ATPase family, AAA domain containing 5                    | Atad5         | 8.3 |     |     |    |
| 1457268_at   | DOT1-like, histone H3 methyltransferase (S. cerevisiae)   | Dot1l         | 8.2 |     |     |    |
| 1460016_at   | transmembrane protein 164                                 | Tmem164       | 8.2 |     |     |    |
| 1442094_at   | inhibitor of growth family, member 5                      | Ing5          | 8.1 |     |     |    |
| 1439139_at   | DNA segment, Chr 2, ERATO Doi 640, expressed              | D2Erdt640e    | 7.9 |     |     |    |
| 1456871_a_at | PHD finger protein 20-like 1                              | Phf20l1       | 7.9 |     |     |    |
| 1443719_x_at | DEAD (Asp-Glu-Ala-Asp) box polypeptide 42                 | Ddx42         | 7.9 |     |     |    |
| 1459283_at   | RIKEN cDNA 6430510B20 gene                                | 6430510B20Rik | 7.9 |     |     |    |
| 1430661_at   | myosin, light polypeptide 6B                              | Myl6b         | 7.9 |     |     |    |
| 1439306_at   | Small optic lobes homolog (Drosophila)                    | Solh          | 7.9 |     |     |    |
| 1439989_at   | tuberous sclerosis 1                                      | Tsc1          | 7.9 |     |     |    |
| 1449610_at   | E1A binding protein p400                                  | Ep400         | 7.8 |     |     |    |
| 1452741_s_at | glycerol phosphate dehydrogenase 2, mitochondrial         | Gpd2          | 7.8 |     |     |    |
| 1453599_at   | tripartite motif-containing 71                            | Trim71        | 7.8 |     |     |    |
| 1444675_at   | expressed sequence AL023051                               | AL023051      | 7.8 |     |     |    |
| 1427285_s_at | metastasis associated lung adenocarcinoma transcript 1    | Malat1        | 7.8 |     |     |    |
| 1445280_at   | adaptor-related protein complex 3, delta 1 subunit        | Ap3d1         | 7.8 |     |     |    |
| 1430862_at   | RIKEN cDNA 2310057M21 gene                                | 2310057M21Rik | 7.7 |     |     |    |
| 1444184_at   | alkB, alkylation repair homolog 3 (E. coli)               | Alkbh3        | 7.7 |     |     |    |
| 1455548_at   | discs, large homolog-associated protein 4 (Drosophila)    | Dlgap4        | 7.7 |     |     |    |
| 1447483_s_at | Small nucleolar RNA host gene (non-protein coding) 7      | Snhg7         | 7.7 |     |     |    |
| 1435589_at   | coiled-coil domain containing 85B                         | Ccdc85b       | 7.6 |     |     |    |
| 1440998_at   | RIKEN cDNA 2310021P13 gene                                | 2310021P13Rik | 7.6 |     |     |    |
| 1441190_at   | actin related protein 2/3 complex, subunit 5-like         | Arpc5l        | 7.6 |     |     |    |
| 1457801_at   | RIKEN cDNA 9930024M15 gene                                | 9930024M15Rik | 7.6 |     |     |    |
| 1439201_at   | ubiquitin specific peptidase 14                           | Usp14         | 7.6 |     |     |    |
| 1457492_at   | Triple functional domain (PTPRF interacting)              | Trio          | 7.6 |     |     |    |
| 1435152_at   | leukocyte receptor cluster (LRC) member 8                 | Leng8         | 7.6 |     |     |    |
| 1440566_at   | RIKEN cDNA D330005C11 gene                                | D330005C11Rik | 7.6 |     |     |    |
| 1437020_at   | E1A binding protein p400                                  | Ep400         | 7.6 |     |     |    |
| 1434974_at   | pyruvate dehydrogenase kinase, isoenzyme 1                | Pdk1          | 7.5 |     |     |    |
| 1457742_at   | DNA, Chr 9, Wayne State University 74, expressed          | D9Wsu74e      | 7.5 |     |     |    |
| 1445660_at   | Transmembrane protein 209                                 | Tmem209       | 7.5 |     |     |    |
| 1453741_x_at | angel homolog 2 (Drosophila)                              | Angel2        | 7.5 |     |     |    |

| Probeset ID  | Gene Title                                                  | Gene Symbol           | 8mo | 60d | 21d | 6d |
|--------------|-------------------------------------------------------------|-----------------------|-----|-----|-----|----|
| 1439082_at   | DEAD (Asp-Glu-Ala-Asp) box polypeptide 50                   | Ddx50                 | 7.5 |     |     |    |
| 1436216_s_at | RIKEN cDNA 2610204M08 gene                                  | 2610204M08Rik         | 7.4 |     |     |    |
| 1455831_at   | fusion, derived from t(12;16) malignant liposarcoma (human) | Fus                   | 7.4 |     |     |    |
| 1440781_at   | RIKEN cDNA B830007D08 gene                                  | B830007D08Rik         | 7.4 | 2.4 | 7.9 |    |
| 1442061_at   | BTB (POZ) domain containing 7                               | Btbd7                 | 7.4 |     |     |    |
| 1430575_a_at | tripeptidyl peptidase II                                    | Tpp2                  | 7.4 |     |     |    |
| 1430077_at   | splicing factor, arginine/serine-rich 11                    | Sfrs11                | 7.3 |     |     |    |
| 1439330_at   | RIKEN cDNA D230040J21 gene                                  | D230040J21Rik         | 7.3 |     |     |    |
| 1456072_at   | protein phosphatase 1, regulatory (inhibitor) subunit 9A    | Ppp1r9a               | 7.3 |     |     |    |
| 1445863_at   | Von Willebrand factor A domain containing 3A                | Vwa3a                 | 7.3 |     |     |    |
| 1439656_at   | Platelet-activating factor acetylhydrolase, isoform 1b      | Pafah1b1              | 7.3 |     |     |    |
| 1453582_at   | choline kinase alpha                                        | Chka                  | 7.3 |     |     |    |
| 1441068_at   | RIKEN cDNA A130001G05 gene                                  | A130001G05Rik         | 7.3 |     |     |    |
| 1440038_at   | RIKEN cDNA B430007K19 gene                                  | B430007K19Rik         | 7.2 |     |     |    |
| 1433351_at   | RIKEN cDNA 4933412L11 gene                                  | 4933412L11Rik         | 7.2 |     |     |    |
| 1457357_at   | tousled-like kinase 2 (Arabidopsis)                         | Tlk2                  | 7.2 |     |     |    |
| 1431372_at   | serine/arginine-rich protein specific kinase 2              | Srpk2                 | 7.2 |     |     |    |
| 1430075_at   | Splicing factor 3b, subunit 3                               | Sf3b3                 | 7.2 |     |     |    |
| 1453171_s_at | protein phosphatase 1A                                      | Ppm1a                 | 7.2 |     |     |    |
| 1440797_at   | Dlx6 opposite strand transcript 2                           | Dlx6os2               | 7.2 |     |     |    |
| 1448346_at   | cofilin 1, non-muscle                                       | Cfl1                  | 7.2 |     |     |    |
| 1424345_s_at | ubiquitin-conjugating enzyme E2M                            | Ube2m                 | 7.1 |     |     |    |
| 1440805_at   | Bromodomain adjacent to zinc finger domain, 1B              | Baz1b                 | 7.1 |     |     |    |
| 1444583_at   | nuclear autoantigenic sperm protein (histone-binding)       | Nasp                  | 7.1 |     |     |    |
| 1444306_at   | Musashi homolog 1(Drosophila)                               | Msi1                  | 7.1 |     |     |    |
| 1440789_at   | neogenin                                                    | Neo1                  | 7.1 |     |     |    |
| 1442271_at   | Cytoskeleton associated protein 5                           | Ckap5                 | 7.1 |     |     |    |
| 1440032_at   | RIKEN cDNA E130008O17 gene                                  | E130008O17Rik         | 7.1 |     |     |    |
| 1456121_at   | centrosomal protein 97                                      | Cep97                 | 7.1 |     |     |    |
| 1458017_at   | PHD finger protein 20                                       | Phf20                 | 7.1 |     |     |    |
| 1444992_at   | expressed sequence AI120166                                 | AI120166              | 7.0 |     |     |    |
| 1455616_at   | expressed sequence AI586002                                 | AI586002              | 7.0 |     |     |    |
| 1457588_at   | expressed sequence C76213                                   | C76213                | 7.0 |     |     |    |
| 1430019_a_at | heterogeneous nuclear ribonucleoprotein A1                  | Hnrnpa1 /// LOC654467 | 7.0 |     |     |    |
| 1444507_at   | ubiquitin specific peptidase 53                             | Usp53                 | 7.0 |     |     |    |
| 1440317_at   | RIKEN cDNA C130068B02 gene                                  | C130068B02Rik         | 6.9 |     |     |    |
| 1437206_at   | SET domain containing 5                                     | Setd5                 | 6.9 |     |     |    |
| 1433063_at   | WD repeat domain 66                                         | Wdr66                 | 6.9 |     |     |    |
| 1430317_at   | ubiquitin-conjugating enzyme E2, J2 homolog (yeast)         | Ube2j2                | 6.8 |     |     |    |
| 1437776_at   | transmembrane and coiled coil domains 1                     | Tmcc1                 | 6.8 |     |     |    |
| 1457823_at   | cysteine rich protein 61                                    | Cyr61                 | 6.8 |     |     |    |
| 1437919_at   | B double prime 1, subunit of RNA polymerase III             | Bdp1                  | 6.8 |     |     |    |
| 1437919_at   | B double prime 1, subunit of RNA polymerase III             | Bdp1                  | 6.8 |     |     |    |
| 1445897_s_at | interferon-induced protein 35                               | Ifi35                 | 6.8 |     |     |    |
| 1455936_a_at | RNA binding protein gene with multiple splicing             | Rbpms                 | 6.8 |     |     |    |
| 1453753_at   | denticleless homolog (Drosophila)                           | Dtl                   | 6.7 |     |     |    |

| Probeset ID  | Gene Title                                                     | Gene Symbol      | 8mo | 60d | 21d | 6d |
|--------------|----------------------------------------------------------------|------------------|-----|-----|-----|----|
| 1456927_at   | microtubule associated serine/threonine kinase 2               | Mast2            | 6.7 |     |     |    |
| 1417640_at   | CD79B antigen                                                  | Cd79b            | 6.7 |     |     |    |
| 1440573_at   | hypothetical protein LOC100040086                              | LOC100040086     | 6.7 |     |     |    |
| 1416326_at   | cysteine-rich protein 1 (intestinal)                           | Crip1            | 6.7 |     |     |    |
| 1435041_at   | myosin, light polypeptide 6                                    | EG433297 ///Myl6 | 6.7 |     |     |    |
| 1433414_at   | RIKEN cDNA 9530086P17 gene                                     | 9530086P17Rik    | 6.7 |     |     |    |
| 1441348_at   | zinc finger protein 422, related sequence 1                    | Zfp422-rs1       | 6.7 |     |     |    |
| 1436536_at   | exocyst complex component 3-like                               | Exoc3l           | 6.7 |     |     |    |
| 1418189_s_at | metastasis associated lung adenocarcinoma transcript 1         | Malat1           | 6.7 |     |     |    |
| 1440854_at   | RIKEN cDNA 2810403A07 gene                                     | 2810403A07Rik    | 6.6 |     |     |    |
| 1441352_at   | RIKEN cDNA 9430034N14 gene                                     | 9430034N14Rik    | 6.6 |     |     |    |
| 1445914_at   | Nuclear respiratory factor 1                                   | Nrf1             | 6.6 |     |     |    |
| 1458220_at   | deleted in liver cancer 1                                      | Dlc1             | 6.6 |     |     |    |
| 1440081_at   | Centrosomal protein 192                                        | Cep192           | 6.6 |     |     |    |
| 1430298_at   | RIKEN cDNA 4930473A06 gene                                     | 4930473A06Rik    | 6.6 |     |     |    |
| 1454182_at   | RIKEN cDNA 5430417C01 gene                                     | 5430417C01Rik    | 6.6 |     |     |    |
| 1442235_at   | Pleiomorphic adenoma gene-like 2                               | Plagl2           | 6.6 |     |     |    |
| 1458452_at   | Ankyrin repeat domain 11                                       | Ankrd11          | 6.6 |     |     |    |
| 1443625_at   | N-acetyltransferase 11                                         | Nat11            | 6.6 |     |     |    |
| 1429593_at   | solute carrier family 38, member 2                             | Slc38a2          | 6.5 |     |     |    |
| 1457755_at   | guanine nucleotide binding protein (G protein), gamma 8        | Gng8             | 6.5 |     |     |    |
| 1431088_at   | forkhead box P4                                                | Foxp4            | 6.5 |     |     |    |
| 1458033_at   | Ubiquitin protein ligase E3 component n-recognin 1             | Ubr1             | 6.5 |     |     |    |
| 1420653_at   | transforming growth factor, beta 1                             | Tgfb1            | 6.5 |     |     |    |
| 1446147_at   | RNA binding motif protein 39                                   | Rbm39            | 6.5 |     |     |    |
| 1444295_at   | neogenin                                                       | Neo1             | 6.5 |     |     |    |
| 1443586_at   | FIP1 like 1 (S. cerevisiae)                                    | Fip111           | 6.5 |     |     |    |
| 1457455_at   | suppressor of hairy wing homolog 4 (Drosophila)                | Suhw4            | 6.4 |     |     |    |
| 1442594_at   | Ttk protein kinase                                             | Ttk              | 6.4 |     |     |    |
| 1444021_at   | sequestosome 1                                                 | Sqstm1           | 6.4 |     |     |    |
| 1427196_at   | cyclin N-terminal domain containing 1                          | Cntd1 /// Wnk4   | 6.4 |     |     |    |
| 1426118_a_at | translocase of outer mitochondrial membrane 40 homolog (yeast) | Tomm40           | 6.4 |     |     |    |
| 1439922_at   | proline-rich coiled-coil 1                                     | Prrc1            | 6.4 |     |     |    |
| 1445260_at   | DCUN1D1 DCN1, domain containing 1 (S. cerevisiae)              | Dcun1d1          | 6.3 |     |     |    |
| 1457198_at   | neuropilin 1                                                   | Nrp1             | 6.3 |     |     |    |
| 1442499_at   | carnitine deficiency-associated gene expressed in ventricle 3  | Cdv3             | 6.3 |     |     |    |
| 1437322_at   | RNA binding motif protein 4                                    | Rbm4             | 6.3 |     |     |    |
| 1439679_at   | chaperonin subunit 3 (gamma)                                   | Cct3             | 6.3 |     |     |    |
| 1448050_s_at | mitogen-activated protein kinase kinase kinase 4               | Map4k4           | 6.3 |     |     |    |
| 1450674_at   | cyclin-dependent kinase 5                                      | Cdk5             | 6.3 |     |     |    |
| 1453687_at   | solute carrier family 4 (anion exchanger), member 3            | Slc4a3           | 6.3 |     |     |    |
| 1419255_at   | spectrin beta 2                                                | Spnb2            | 6.3 |     |     |    |
| 1425513_at   | mitogen-activated protein kinase kinase 7                      | Map2k7           | 6.3 |     |     |    |
| 1437576_at   | RIKEN cDNA 2810427A07 gene                                     | 2810427A07Rik    | 6.2 |     |     |    |
| 1431485_at   | RIKEN cDNA 4833447I15 gene                                     | 4833447I15Rik    | 6.2 |     |     |    |
| 1442744_at   | RNA binding motif protein 39                                   | Rbm39            | 6.2 |     |     |    |

| Probeset ID  | Gene Title                                          | Gene Symbol        | 8mo | 60d | 21d | 6d |
|--------------|-----------------------------------------------------|--------------------|-----|-----|-----|----|
| 1449916_at   | pre-B-cell leukemia homeobox 4                      | Pbx4               | 6.2 |     |     |    |
| 1429951_at   | single-stranded DNA binding protein 2               | Ssbp2              | 6.1 |     |     |    |
| 1425909_at   | predicted gene, ENSMUSG00000042973                  | ENSMUSG00000042973 | 6.1 |     |     |    |
| 1445147_at   | proteasome (prosome, macropain) activator subunit 4 | Psmc4              | 6.1 |     |     |    |
| 1453681_at   | ATPase inhibitory factor 1                          | Atpif1             | 6.1 |     |     |    |
| 1419814_s_at | S100 calcium binding protein A1                     | S100a1             | 6.1 |     |     |    |
| 1448341_a_at | syntaxin binding protein 2                          | Stxbp2             | 6.1 |     |     |    |
| 1443702_at   | microtubule-associated protein 4                    | Mtap4              | 6.0 |     |     |    |
| 1433070_at   | RIKEN cDNA 5830433M15 gene                          | 5830433M15Rik      | 6.0 |     |     |    |
| 1431847_at   | RIKEN cDNA 5330439K02 gene                          | 5330439K02Rik      | 6.0 |     |     |    |
| 1456136_at   | Kinesin family member C1                            | Kifc1              | 6.0 |     |     |    |
| 1425912_at   | centrosomal protein 164                             | Cep164             | 6.0 |     |     |    |
| 1442340_x_at | cysteine rich protein 61                            | Cyr61              | 6.0 |     |     |    |
| 1439674_at   | solute carrier family 4 (anion exchanger), member 8 | Slc4a8             | 5.9 |     |     |    |
| 1442155_at   | RIKEN cDNA 4632427E13 gene                          | 4632427E13Rik      | 5.9 |     |     |    |
| 1444764_at   | RIKEN cDNA A130022J21 gene                          | A130022J21Rik      | 5.9 |     |     |    |
| 1442200_at   | RIKEN cDNA 1810063B07 gene                          | 1810063B07Rik      | 5.9 |     |     |    |
| 1445861_at   | Ubiquitin specific peptidase 25                     | Usp25              | 5.9 |     |     |    |
| 1437048_x_at | syntaxin binding protein 2                          | Stxbp2             | 5.9 |     |     |    |
| 1453840_at   | poly A binding protein, cytoplasmic 1               | Pabpc1             | 5.9 |     |     |    |
| 1418691_at   | regulator of G-protein signaling 9                  | Rgs9               | 5.9 |     |     |    |
| 1453583_at   | zinc finger, ZZ-type with EF hand domain 1          | Zzef1              | 5.9 |     |     |    |
| 1418745_at   | osteomodulin                                        | Omd                | 5.8 |     |     |    |
| 1440302_at   | solute carrier family 25                            | Slc25a3            | 5.8 |     |     |    |
| 1444857_at   | expressed sequence C87312                           | C87312             | 5.8 |     |     |    |
| 1441977_at   | RIKEN cDNA 9630023C09 gene                          | 9630023C09Rik      | 5.8 |     |     |    |
| 1450573_at   | anti-Mullerian hormone                              | Amh                | 5.8 |     |     |    |
| 1456706_at   | RIKEN cDNA 4833441D16 gene                          | 4833441D16Rik      | 5.8 |     |     |    |
| 1424174_at   | Sh3kbp1 binding protein 1                           | Shkbp1             | 5.8 |     |     |    |
| 1446148_x_at | RNA binding motif protein 39                        | Rbm39              | 5.8 |     |     |    |
| 1454578_at   | RIKEN cDNA 6030458A19 gene                          | 6030458A19Rik      | 5.8 |     |     |    |
| 1444651_at   | hypothetical LOC553089                              | LOC553089          | 5.8 |     |     |    |
| 1441480_at   | predicted gene, ENSMUSG00000073237                  | ENSMUSG00000073237 | 5.8 |     |     |    |
| 1436268_at   | dendrin                                             | Ddn                | 5.8 |     |     |    |
| 1442943_at   | Ubiquitin specific peptidase 20                     | Usp20              | 5.8 |     |     |    |
| 1440002_at   | RNA (guanine-7-) methyltransferase                  | Rnmt               | 5.8 |     |     |    |
| 1432830_at   | coiled-coil domain containing 138                   | Ccdc138            | 5.8 |     |     |    |
| 1432266_at   | enhancer trap locus 4                               | Etl4               | 5.8 |     |     |    |
| 1457781_at   | KCNQ1 overlapping transcript 1                      | Kcnq1ot1           | 5.8 |     |     |    |
| 1426807_at   | Leukotriene A4 hydrolase                            | Lta4h              | 5.8 |     |     |    |
| 1424496_at   | RIKEN cDNA 5133401N09 gene                          | 5133401N09Rik      | 5.7 |     |     |    |
| 1425964_x_at | heat shock protein 1                                | Hspb1              | 5.7 |     |     |    |
| 1441528_at   | tetratricopeptide repeat domain 15                  | Ttc15              | 5.7 |     |     |    |
| 1439033_at   | zinc finger, CCHC domain containing 7               | Zcchc7             | 5.7 |     |     |    |
| 1430059_at   | WD repeat domain 40A                                | Wdr40a             | 5.7 |     |     |    |
| 1446618_at   | hypothetical gene supported by AK038224             | LOC432971          | 5.7 |     |     |    |

| Probeset ID  | Gene Title                                                 | Gene Symbol   | 8mo | 60d | 21d | 6d  |
|--------------|------------------------------------------------------------|---------------|-----|-----|-----|-----|
| 1442667_at   | cell division cycle 40 homolog (yeast)                     | Cdc40         | 5.7 |     |     |     |
| 1445003_at   | phenylalanyl-tRNA synthetase, alpha subunit                | Farsa         | 5.7 |     |     |     |
| 1439094_at   | clathrin, heavy polypeptide (Hc)                           | Cltc          | 5.7 |     |     |     |
| 1440986_at   | RNA polymerase II associated protein 1                     | Rpap1         | 5.7 |     |     |     |
| 1458814_at   | expressed sequence AU022855                                | AU022855      | 5.7 |     |     |     |
| 1429996_at   | RIKEN cDNA 6330417A16 gene                                 | 6330417A16Rik | 5.7 |     |     |     |
| 1429283_at   | CDGSH iron sulfur domain 2                                 | Cisd2         | 5.6 |     |     |     |
| 1446268_at   | Pleckstrin homology, Sec7 and coiled-coil domains 3        | Pscd3         | 5.6 |     |     |     |
| 1423267_s_at | integrin alpha 5 (fibronectin receptor alpha)              | Itga5         | 5.6 |     |     | 2.1 |
| 1445151_at   | Metal response element binding transcription factor 2      | Mtf2          | 5.6 |     |     |     |
| 1424986_s_at | F-box and WD-40 domain protein 7                           | Fbxw7         | 5.6 |     |     |     |
| 1460672_at   | RIKEN cDNA 2410002F23 gene                                 | 2410002F23Rik | 5.5 |     |     |     |
| 1444417_at   | RIKEN cDNA 9330101J02 gene                                 | 9330101J02Rik | 5.5 |     |     |     |
| 1438663_at   | BAT2 domain containing 1                                   | Bat2d         | 5.5 |     |     |     |
| 1430920_at   | tRNA methyltransferase 11 homolog (S. cerevisiae)          | Trmt11        | 5.5 |     |     |     |
| 1457003_at   | glutamate receptor, ionotropic, NMDA2B (epsilon 2)         | Grin2b        | 5.5 |     |     |     |
| 1457458_at   | zinc finger CCCH-type containing 4                         | Zc3h4         | 5.5 |     |     |     |
| 1458423_at   | LUC7-like 2 (S. cerevisiae)                                | Luc7l2        | 5.5 |     |     |     |
| 1429477_at   | non-SMC condensin II complex, subunit H2                   | Ncaph2        | 5.5 |     |     |     |
| 1446433_at   | acyl-Coenzyme A binding domain containing 5                | Acbd5         | 5.5 |     |     |     |
| 1434752_at   | zinc finger protein 207                                    | Zfp207        | 5.5 |     |     |     |
| 1420289_at   | expressed sequence T25656                                  | T25656        | 5.5 |     |     |     |
| 1429782_at   | gene rich cluster, C10 gene                                | Grccl0        | 5.4 |     |     |     |
| 1438294_at   | ataxin 1                                                   | Atxn1         | 5.4 |     |     |     |
| 1417561_at   | apolipoprotein C-I                                         | Apoc1         | 5.4 |     |     |     |
| 1431708_a_at | cytotoxic granule-associated RNA binding protein 1         | Tia1          | 5.4 |     |     |     |
| 1443592_at   | expressed sequence AA617406                                | AA617406      | 5.4 |     |     |     |
| 1443619_at   | transmembrane protein 30A                                  | Tmem30a       | 5.4 |     |     |     |
| 1432184_a_at | RIKEN cDNA 2610204M08 gene                                 | 2610204M08Rik | 5.4 |     |     |     |
| 1431212_a_at | tRNA methyltransferase 6 homolog (S. cerevisiae)           | Trmt6         | 5.4 |     |     |     |
| 1432775_at   | RIKEN cDNA 9430087J23 gene                                 | 9430087J23Rik | 5.4 |     |     |     |
| 1442745_x_at | RNA binding motif protein 39                               | Rbm39         | 5.4 |     |     |     |
| 1458276_x_at | citron                                                     | Cit           | 5.4 |     |     |     |
| 1438208_at   | TAO kinase 2                                               | Taok2         | 5.4 |     |     |     |
| 1436683_at   | RIKEN cDNA 1700011M02 gene                                 | 1700011M02Rik | 5.4 |     |     |     |
| 1429902_at   | RIKEN cDNA 5830443J22 gene                                 | 5830443J22Rik | 5.4 |     |     |     |
| 1442244_at   | InaD-like (Drosophila)                                     | Inadl         | 5.4 |     |     |     |
| 1444942_at   | helicase with zinc finger domain                           | Helz          | 5.3 |     |     |     |
| 1441231_at   | Hypothetical protein LOC100042016                          | LOC100042016  | 5.3 |     |     |     |
| 1430127_a_at | cyclin D2                                                  | Ccnd2         | 5.3 |     |     |     |
| 1440063_at   | phenylalanyl-tRNA synthetase, alpha subunit                | Farsa         | 5.3 |     |     |     |
| 1441549_at   | Phosphatidylinositol 4-kinase, catalytic, beta polypeptide | Pi4kb         | 5.3 |     |     |     |
| 1451538_at   | SRY-box containing gene 9                                  | Sox9          | 5.3 |     |     |     |
| 1428127_at   | RIKEN cDNA 4921506J03 gene                                 | 4921506J03Rik | 5.3 |     |     |     |
| 1444225_at   | SH3-domain GRB2-like (endophilin) interacting protein 1    | Sgip1         | 5.3 |     |     |     |
| 1449439_at   | Kruppel-like factor 7 (ubiquitous)                         | Klf7          | 5.3 |     |     |     |

| Probeset ID  | Gene Title                                                 | Gene Symbol            | 8mo | 60d | 21d | 6d |
|--------------|------------------------------------------------------------|------------------------|-----|-----|-----|----|
| 1445141_at   | Inhibitor of kappaB kinase beta                            | Ikbkb                  | 5.3 |     |     |    |
| 1431551_at   | RIKEN cDNA 2610028D06 gene                                 | 2610028D06Rik          | 5.3 |     |     |    |
| 1453371_at   | RIKEN cDNA 4930535B03 gene                                 | 4930535B03Rik          | 5.3 |     |     |    |
| 1458724_at   | RIKEN cDNA E230008O15 gene                                 | E230008O15Rik          | 5.3 |     |     |    |
| 1439248_at   | RMI1, RecQ mediated genome instability 1 (S. cerevisiae)   | Rmi1                   | 5.2 |     |     |    |
| 1432558_a_at | myelin and lymphocyte protein                              | Mal                    | 5.2 |     |     |    |
| 1440392_at   | A kinase (PRKA) anchor protein 13                          | Akap13                 | 5.2 |     |     |    |
| 1444183_at   | RIKEN cDNA C030013C21 gene                                 | C030013C21Rik          | 5.2 |     |     |    |
| 1455125_at   | centaurin, beta 1                                          | Centb1                 | 5.2 |     |     |    |
| 1430020_x_at | heterogeneous nuclear ribonucleoprotein A1                 | Hnrnpa1                | 5.2 |     |     |    |
| 1454009_at   | RIKEN cDNA 1700008O03 gene                                 | 1700008O03Rik          | 5.2 |     |     |    |
| 1457712_at   | chromodomain helicase DNA binding protein 8                | Chd8                   | 5.2 |     |     |    |
| 1453608_at   | centrosome and spindle pole associated protein 1           | Cspp1                  | 5.2 |     |     |    |
| 1431736_at   | RIKEN cDNA 4933405D12 gene                                 | 4933405D12Rik          | 5.2 |     |     |    |
| 1458305_at   | Transmembrane and tetratricopeptide repeat containing 3    | Tmtc3                  | 5.2 |     |     |    |
| 1457716_at   | OTU domain containing 7B                                   | Otud7b                 | 5.1 |     |     |    |
| 1448817_at   | OTU domain, ubiquitin aldehyde binding 1                   | LOC100046081 /// Otub1 | 5.1 |     |     |    |
| 1458409_at   | expressed sequence C86595                                  | C86595                 | 5.1 |     |     |    |
| 1456918_at   | Ras association and pleckstrin homology domains 1          | Raph1                  | 5.1 |     |     |    |
| 1418630_at   | KH domain containing, RNA binding, signal transduction 1   | Khdrbs1                | 5.1 |     |     |    |
| 1431659_at   | transmembrane protein 86B                                  | Tmem86b                | 5.1 |     |     |    |
| 1454537_at   | RIKEN cDNA 4930556A12 gene                                 | 4930556A12Rik          | 5.1 |     |     |    |
| 1432151_at   | Obg-like ATPase 1                                          | Ola1                   | 5.1 |     |     |    |
| 1459151_x_at | interferon-induced protein 35                              | Ifi35                  | 5.1 |     |     |    |
| 1441976_at   | RIKEN cDNA 5430434G16 gene                                 | 5430434G16Rik          | 5.1 |     |     |    |
| 1420950_at   | zinc and ring finger 1                                     | Znrf1                  | 5.1 |     |     |    |
| 1446118_at   | DNA segment, Chr 17, ERATO Doi 165, expressed              | D17Ertd165e            | 5.1 |     |     |    |
| 1424893_at   | nuclear distribution gene E-like homolog 1 (A. nidulans)   | Ndel1                  | 5.1 |     |     |    |
| 1431281_at   | dysferlin interacting protein 1                            | Dysfip1                | 5.1 |     |     |    |
| 1418349_at   | heparin-binding EGF-like growth factor                     | Hbegf                  | 5.1 |     |     |    |
| 1427853_a_at | heat shock protein 25, pseudogene 1                        | Hsp25-ps1              | 5.1 |     |     |    |
| 1439240_x_at | lin-7 homolog B (C. elegans)                               | Lin7b                  | 5.0 | 2.0 | 9.8 |    |
| 1421786_at   | protein phosphatase 3, regulatory subunit B, alpha isoform | Ppp3r1                 | 5.0 |     |     |    |
| 1443768_at   | Ras homolog gene family, member A                          | Rhoa                   | 5.0 |     |     |    |
| 1457459_at   | expressed sequence AU014973                                | AU014973               | 5.0 |     |     |    |
| 1440943_at   | RIKEN cDNA B230208H17 gene                                 | B230208H17Rik          | 5.0 |     |     |    |
| 1440268_at   | tripartite motif-containing 41                             | Trim41                 | 5.0 |     |     |    |
| 1443125_at   | thyroid hormone receptor interactor 12                     | Trip12                 | 5.0 |     |     |    |
| 1446847_at   | coiled-coil domain containing 88C                          | Ccdc88c                | 5.0 |     |     |    |
| 1424898_at   | solute carrier family 10                                   | Slc10a1                | 5.0 |     |     |    |
| 1441100_at   | mbt domain containing 1                                    | Mbtd1                  | 5.0 |     |     |    |
| 1433420_at   | RIKEN cDNA 4930527J03 gene                                 | 4930527J03Rik          | 5.0 |     |     |    |
| 1433281_at   | prune homolog (Drosophila)                                 | Prune                  | 5.0 |     |     |    |
| 1441568_at   | oxidative stress induced growth inhibitor family member 2  | Osgin2                 | 5.0 |     |     |    |
| 1441956_s_at | Cut-like homeobox 1                                        | Cux1                   | 5.0 |     |     |    |
| 1428005_at   | MOCO sulphurase C-terminal domain containing 1             | LOC100045982 /// Mosc1 | 5.0 |     |     |    |

| Probeset ID  | Gene Title                                                | Gene Symbol         | 8mo | 60d | 21d | 6d |
|--------------|-----------------------------------------------------------|---------------------|-----|-----|-----|----|
| 1442925_at   | RIKEN cDNA 2610207I05 gene                                | 2610207I05Rik       | 4.9 |     |     |    |
| 1428820_at   | microtubule-associated protein, RP/EB family, member 1    | Mapre1              | 4.9 |     |     |    |
| 1427854_x_at | heat shock protein 25, pseudogene 1                       | Hsp25-ps1           | 4.9 |     |     |    |
| 1425887_at   | RIKEN cDNA 4930511J11 gene                                | 4930511J11Rik       | 4.9 |     |     |    |
| 1417248_at   | ralA binding protein 1                                    | Ralbp1              | 4.9 |     |     |    |
| 1441843_s_at | RIKEN cDNA 5230400M03 gene                                | 5230400M03Rik       | 4.9 |     |     |    |
| 1429009_at   | U1 small nuclear ribonucleoprotein polypeptide A          | Snrp70              | 4.9 |     |     |    |
| 1432406_at   | carboxylesterase 7                                        | Ces7                | 4.9 |     |     |    |
| 1447517_at   | superkiller viralicidic activity 2-like 2 (S. cerevisiae) | Skiv2I2             | 4.9 |     |     |    |
| 1437700_at   | Schwannomin interacting protein 1                         | Schip1              | 4.9 |     |     |    |
| 1432929_at   | RIKEN cDNA 4930453O09 gene                                | 4930453O09Rik       | 4.9 |     |     |    |
| 1419185_a_at | MLX interacting protein-like                              | Mlxipl              | 4.8 |     |     |    |
| 1428376_at   | RIKEN cDNA 4932415G12 gene                                | 4932415G12Rik       | 4.8 |     |     |    |
| 1426287_at   | ataxin 7                                                  | Atxn7               | 4.8 |     |     |    |
| 1447213_at   | Mus musculus, clone IMAGE:4925729, mRNA                   | ---                 | 4.8 |     |     |    |
| 1445143_at   | vasohibin 1                                               | Vash1               | 4.8 |     |     |    |
| 1428954_at   | solute carrier family 9                                   | Slc9a3r2            | 4.8 |     |     |    |
| 1439352_at   | tripartite motif-containing 7                             | Trim7               | 4.8 |     |     |    |
| 1435394_s_at | ras homolog gene family, member C                         | Rhoc                | 4.8 |     |     |    |
| 1430732_at   | RIKEN cDNA 4921525D07 gene                                | 4921525D07Rik       | 4.8 |     |     |    |
| 1459332_at   | itchy, E3 ubiquitin protein ligase                        | Itch                | 4.8 |     |     |    |
| 1431140_at   | thioesterase superfamily member 4                         | Them4               | 4.8 |     |     |    |
| 1426729_at   | RIKEN cDNA 2900046G09 gene                                | 2900046G09Rik       | 4.8 |     |     |    |
| 1449957_at   | protein tyrosine phosphatase, receptor type, V            | Ptprv               | 4.8 |     |     |    |
| 1443947_at   | LIM and senescent cell antigen-like domains 1             | Lims1               | 4.8 |     |     |    |
| 1436909_at   | solute carrier family 25, member 44                       | Slc25a44            | 4.8 |     |     |    |
| 1439111_at   | TSC22 domain family, member 1                             | Tsc22d1             | 4.8 |     |     |    |
| 1423515_at   | sodium channel, voltage-gated, type VIII, alpha           | Scn8a               | 4.8 |     |     |    |
| 1438580_at   | zinc finger, CCHC domain containing 7                     | Zcchc7              | 4.8 |     |     |    |
| 1444670_at   | RIKEN cDNA A130004G11 gene                                | A130004G11Rik       | 4.8 |     |     |    |
| 1418144_a_at | phosphatidylinositol-4-phosphate 5-kinase, type 1 alpha   | Pip5k1a             | 4.8 |     |     |    |
| 1432006_at   | adaptor protein complex AP-2, alpha 2 subunit             | Ap2a2               | 4.8 |     |     |    |
| 1416449_x_at | syntaxin binding protein 2                                | Stxbp2              | 4.8 |     |     |    |
| 1431525_at   | RIKEN cDNA 9130002K18 gene                                | 9130002K18Rik       | 4.8 |     |     |    |
| 1429657_at   | zinc finger, AN1-type domain 5                            | Zfand5              | 4.7 |     | 2.8 |    |
| 1434874_x_at | centaurin, beta 1                                         | Centb1              | 4.7 |     |     |    |
| 1432861_at   | RIKEN cDNA 2900046F13 gene                                | 2900046F13Rik       | 4.7 |     |     |    |
| 1440658_at   | AMME chromosomal region gene 1-like                       | Ammecr11            | 4.7 |     |     |    |
| 1444796_at   | expressed sequence C76876                                 | C76876              | 4.7 |     |     |    |
| 1433231_at   | RIKEN cDNA 4933426I03 gene                                | 4933426I03Rik       | 4.7 |     |     |    |
| 1433574_at   | cell division cycle 37 homolog (S. cerevisiae)-like 1     | Cdc3711             | 4.7 |     |     |    |
| 1437745_at   | chromodomain helicase DNA binding protein 7               | Chd7                | 4.7 |     |     |    |
| 1456139_at   | antisense Igf2r RNA                                       | Air                 | 4.7 |     |     |    |
| 1439095_at   | splicing factor, arginine/serine-rich 11                  | Sfrs11              | 4.7 |     |     |    |
| 1429345_at   | tubulin, gamma complex associated protein 4               | Tubgcp4             | 4.7 |     |     |    |
| 1454788_at   | ADP-ribosylation factor-like 4C                           | Arl4c /// LOC632433 | 4.7 |     |     |    |

| Probeset ID  | Gene Title                                                       | Gene Symbol            | 8mo | 60d | 21d | 6d |
|--------------|------------------------------------------------------------------|------------------------|-----|-----|-----|----|
| 1425512_at   | mitogen-activated protein kinase kinase 7                        | Map2k7                 | 4.6 |     |     |    |
| 1432631_at   | proline-rich coiled-coil 1                                       | Prrc1                  | 4.6 |     |     |    |
| 1420147_at   | expressed sequence AA407331                                      | AA407331               | 4.6 |     |     |    |
| 1431528_at   | RIKEN cDNA 5830427D02 gene                                       | 5830427D02Rik          | 4.6 |     |     |    |
| 1447290_at   | SYS1 Golgi integral membrane protein homolog (S. cerevisiae)     | Sys1                   | 4.6 |     |     |    |
| 1416228_at   | protein (peptidyl-prolyl cis/trans isomerase) NIMA-interacting 1 | Pin1                   | 4.6 |     |     |    |
| 1416023_at   | fatty acid binding protein 3, muscle and heart                   | Fabp3                  | 4.6 |     |     |    |
| 1450795_at   | luteinizing hormone beta                                         | Lhb                    | 4.6 |     |     |    |
| 1451853_at   | fukutin                                                          | Fktn                   | 4.6 |     |     |    |
| 1453358_s_at | antagonist of mitotic exit network 1 homolog (S.cerevisiae)      | 5830467E07Rik /// Amn1 | 4.6 |     |     |    |
| 1458942_at   | RIKEN cDNA C230037E05 gene                                       | C230037E05Rik          | 4.6 |     |     |    |
| 1441507_at   | spectrin beta 2                                                  | Spnb2                  | 4.6 |     |     |    |
| 1443154_at   | hypothetical protein 6030438J01                                  | 6030438J01             | 4.6 |     |     |    |
| 1457262_at   | RIKEN cDNA 2610207I05 gene                                       | 2610207I05Rik          | 4.6 |     |     |    |
| 1453788_at   | Mus musculus, clone IMAGE:1329925, mRNA                          | ---                    | 4.6 |     |     |    |
| 1429433_at   | BAT2 domain containing 1                                         | Bat2d                  | 4.5 |     |     |    |
| 1454440_at   | RIKEN cDNA 4930421C12 gene                                       | 4930421C12Rik          | 4.5 |     |     |    |
| 1441229_at   | RIKEN cDNA D230019N24 gene                                       | D230019N24Rik          | 4.5 |     |     |    |
| 1439166_at   | nucleolar protein 11                                             | Nol11                  | 4.5 |     |     |    |
| 1421268_at   | UDP-glucose ceramide glucosyltransferase                         | Ugcg                   | 4.5 |     |     |    |
| 1439328_at   | nuclear factor of activated T-cells 5                            | Nfat5                  | 4.5 |     |     |    |
| 1442643_at   | jumonji domain containing 3                                      | Jmjd3                  | 4.5 |     |     |    |
| 1441462_at   | dedicator of cytokinesis 4                                       | Dock4                  | 4.5 |     |     |    |
| 1439058_at   | splicing factor proline/glutamine rich                           | Sfpq                   | 4.5 |     |     |    |
| 1439128_at   | zinc finger and BTB domain containing 20                         | Zbtb20                 | 4.5 |     |     |    |
| 1442494_at   | expressed sequence C79242                                        | C79242                 | 4.5 |     |     |    |
| 1418784_at   | glutamate receptor, ionotropic, kainate 5 (gamma 2)              | Grik5                  | 4.5 |     |     |    |
| 1437538_at   | small nucleolar RNA host gene (non-protein coding) 7             | Snhg7                  | 4.5 |     |     |    |
| 1426028_a_at | citron                                                           | Cit                    | 4.5 |     |     |    |
| 1458545_at   | Transmembrane protein 57                                         | Tmem57                 | 4.5 |     |     |    |
| 1439839_at   | RIKEN cDNA D130051D11 gene                                       | D130051D11Rik          | 4.5 |     |     |    |
| 1446251_at   | hypothetical protein 4930565A17                                  | 4930565A17             | 4.5 |     |     |    |
| 1421346_a_at | solute carrier family 6                                          | Slc6a6                 | 4.4 |     |     |    |
| 1439594_at   | RIKEN cDNA D130062J10 gene                                       | D130062J10Rik          | 4.4 |     |     |    |
| 1426983_at   | formin binding protein 1                                         | Fnbp1                  | 4.4 |     |     |    |
| 1425857_at   | F-box and WD-40 domain protein 9                                 | Fbxw9                  | 4.4 |     |     |    |
| 1442541_at   | Ornithine decarboxylase antizyme 2                               | Oaz2                   | 4.4 |     |     |    |
| 1457205_at   | N-ethylmaleimide sensitive fusion protein                        | Nsf                    | 4.4 |     |     |    |
| 1427116_at   | SET domain containing 1A                                         | Setd1a                 | 4.4 |     |     |    |
| 1430318_at   | spermidine/spermine N1-acetyl transferase 2                      | Sat2                   | 4.4 |     |     |    |
| 1429537_at   | splicing factor, arginine/serine-rich 18                         | Sfrs18                 | 4.4 |     |     |    |
| 1432868_at   | DAZ interacting protein 3, zinc finger                           | Dzip3                  | 4.4 |     |     |    |
| 1427749_at   | UDP-N-acetyl-alpha-D-galactosamine                               | Galnt3                 | 4.4 |     |     |    |
| 1436967_at   | ankyrin repeat domain 11                                         | Ankr11                 | 4.4 |     |     |    |
| 1429315_at   | synaptotagmin XI                                                 | Syt11                  | 4.4 |     |     |    |
| 1421255_a_at | calcium binding protein 1                                        | Cabp1                  | 4.4 |     |     |    |

| Probeset ID  | Gene Title                                                        | Gene Symbol             | 8mo | 60d | 21d | 6d  |
|--------------|-------------------------------------------------------------------|-------------------------|-----|-----|-----|-----|
| 1459099_at   | transmembrane channel-like gene family 7                          | Tmc7                    | 4.4 |     |     |     |
| 1441799_at   | RIKEN cDNA 6030422H21 gene                                        | 6030422H21Rik           | 4.3 |     |     |     |
| 1440644_at   | poly (ADP-ribose) polymerase family, member 6                     | Parp6                   | 4.3 |     |     |     |
| 1452849_at   | transcriptional regulator, SIN3B (yeast)                          | Sin3b                   | 4.3 |     |     |     |
| 1420435_at   | RIKEN cDNA 1700011A15 gene                                        | 1700011A15Rik           | 4.3 |     |     |     |
| 1441571_at   | RIKEN cDNA 2410089E03 gene                                        | 2410089E03Rik           | 4.3 |     |     |     |
| 1440729_at   | epidermal growth factor receptor pathway substrate 15             | Eps15                   | 4.3 |     |     |     |
| 1431998_at   | RIKEN cDNA 4930432L08 gene                                        | 4930432L08Rik           | 4.3 |     |     |     |
| 1453135_at   | fibronectin type III domain containing 5                          | Fndc5                   | 4.3 |     |     |     |
| 1441668_at   | RIKEN cDNA E130107B13 gene                                        | E130107B13Rik           | 4.3 |     |     |     |
| 1441752_at   | ADP-ribosyltransferase 3                                          | Art3                    | 4.3 |     |     |     |
| 1435126_at   | Dual specificity phosphatase-like 15                              | Dusp15                  | 4.3 |     |     |     |
| 1449018_at   | profilin 1                                                        | Pfn1                    | 4.3 |     |     |     |
| 1445918_at   | Transmembrane protein 2                                           | Tmem2                   | 4.3 |     |     |     |
| 1442843_at   | RIKEN cDNA 4933411D12 gene                                        | 4933411D12Rik           | 4.3 |     |     |     |
| 1453976_at   | RIKEN cDNA 4432414F05 gene                                        | 4432414F05Rik           | 4.3 |     |     |     |
| 1449188_at   | midnolin                                                          | Midn                    | 4.3 |     |     |     |
| 1419654_at   | transducin-like enhancer of split 3, homolog of Drosophila E(spl) | Tle3                    | 4.3 |     |     |     |
| 1451132_at   | pre-B-cell leukemia transcription factor interacting protein 1    | LOC100046056 /// Pbxip1 | 4.3 |     |     |     |
| 1422831_at   | fibrillin 2                                                       | Fbn2                    | 4.3 |     |     |     |
| 1452416_at   | interleukin 6 receptor, alpha                                     | Il6ra                   | 4.3 |     |     |     |
| 1439293_at   | cDNA sequence BC031353                                            | BC031353                | 4.3 |     |     |     |
| 1429658_a_at | structural maintenance of chromosomes 2                           | Smc2                    | 4.3 |     |     |     |
| 1458889_at   | Ena-vasodilator stimulated phosphoprotein                         | Evl                     | 4.2 |     |     |     |
| 1458078_at   | chromodomain helicase DNA binding protein 9                       | Chd9                    | 4.2 |     |     |     |
| 1439252_at   | Inner centromere protein                                          | Incenp                  | 4.2 |     |     |     |
| 1445091_at   | ataxia telangiectasia and Rad3 related                            | Atr                     | 4.2 |     |     |     |
| 1424996_at   | CASP8 and FADD-like apoptosis regulator                           | Cflar                   | 4.2 |     |     | 2.1 |
| 1434873_a_at | centaurin, beta 1 /// similar to Centaurin, beta 1                | Centb1 /// LOC100045877 | 4.2 |     |     |     |
| 1429489_at   | REX1, RNA exonuclease 1 homolog (S. cerevisiae)                   | Rexo1                   | 4.2 |     |     |     |
| 1452321_at   | bromodomain and WD repeat domain containing 1                     | Brwd1                   | 4.2 |     |     |     |
| 1448660_at   | Rho GDP dissociation inhibitor (GDI) gamma                        | Arhgdig                 | 4.2 |     |     |     |
| 1431960_at   | WW domain-containing oxidoreductase                               | Wwox                    | 4.2 |     |     |     |
| 1453595_at   | RIKEN cDNA 2900064B18 gene                                        | 2900064B18Rik           | 4.2 |     |     |     |
| 1442057_at   | expressed sequence AA986695                                       | AA986695                | 4.2 |     |     |     |
| 1457218_at   | RIKEN cDNA 6430510M02 gene                                        | 6430510M02Rik           | 4.2 |     |     |     |
| 1444565_at   | expressed sequence BB166591                                       | BB166591                | 4.2 |     |     |     |
| 1437235_x_at | LIM domain containing preferred translocation partner in lipoma   | Lpp                     | 4.2 |     |     |     |
| 1437180_at   | RIKEN cDNA 6530403A03 gene                                        | 6530403A03Rik           | 4.2 |     |     |     |
| 1457579_at   | DNA segment, Chr 11, ERATO Doi 717, expressed                     | D11ErtD717e             | 4.2 | 2.4 |     |     |
| 1440100_at   | Coiled-coil domain containing 130                                 | Ccdc130                 | 4.2 |     |     |     |
| 1444526_at   | Signal sequence receptor, alpha                                   | Ssr1                    | 4.2 |     |     |     |
| 1438559_x_at | solute carrier family 44, member 2                                | Slc44a2                 | 4.1 |     |     |     |
| 1430329_at   | cingulin                                                          | Cgn                     | 4.1 |     |     |     |
| 1430188_at   | RIKEN cDNA 1700037C18 gene                                        | 1700037C18Rik           | 4.1 |     |     |     |
| 1417632_at   | ATPase, H+ transporting, lysosomal V0 subunit A1                  | Atp6v0a1                | 4.1 |     |     |     |

| Probeset ID  | Gene Title                                                    | Gene Symbol            | 8mo | 60d | 21d | 6d  |
|--------------|---------------------------------------------------------------|------------------------|-----|-----|-----|-----|
| 1442885_at   | SREBF chaperone                                               | Scap                   | 4.1 |     |     |     |
| 1435871_at   | RIKEN cDNA 2600009P04 gene                                    | 2600009P04Rik          | 4.1 |     |     |     |
| 1451612_at   | metallothionein 1                                             | Mt1                    | 4.1 |     |     |     |
| 1433147_at   | caldesmon 1                                                   | Cald1                  | 4.1 |     |     |     |
| 1439696_at   | nuclear receptor subfamily 2, group C, member 2               | Nr2c2                  | 4.1 |     |     |     |
| 1422486_a_at | MAD homolog 4 (Drosophila)                                    | LOC100048076 /// Smad4 | 4.1 | 4.1 |     | 3.1 |
| 1458431_at   | eukaryotic translation initiation factor 4, gamma 2           | Eif4g2                 | 4.1 |     |     |     |
| 1439972_at   | ethanolamine kinase 1                                         | Etnk1                  | 4.1 |     |     |     |
| 1441186_at   | sal-like 3 (Drosophila)                                       | Sall3                  | 4.1 |     |     |     |
| 1436788_at   | acid phosphatase 2, lysosomal                                 | Acp2                   | 4.1 |     |     |     |
| 1416834_x_at | NADH dehydrogenase (ubiquinone) 1 beta subcomplex, 2          | Ndufb2                 | 4.1 |     |     |     |
| 1429708_at   | NADH dehydrogenase (ubiquinone) 1 alpha subcomplex 11         | Ndufa11                | 4.1 |     |     |     |
| 1442316_x_at | transformation related protein 53 binding protein 1           | Trp53bp1               | 4.1 |     |     |     |
| 1439161_at   | SAPS domain family, member 3                                  | Saps3                  | 4.1 |     |     |     |
| 1437493_at   | RIKEN cDNA 5230400M03 gene                                    | 5230400M03Rik          | 4.1 |     |     |     |
| 1420881_at   | nuclear receptor-binding SET-domain protein 1                 | Nsd1                   | 4.1 |     |     |     |
| 1448049_at   | jumonji domain containing 1C                                  | Jmjd1c                 | 4.0 |     |     |     |
| 1428083_at   | RIKEN cDNA 2310043N10 gene                                    | 2310043N10Rik          | 4.0 |     |     |     |
| 1417637_a_at | high mobility group 20 B                                      | Hmg20b                 | 4.0 |     |     |     |
| 1441688_at   | RIKEN cDNA 6430537I21 gene                                    | 6430537I21Rik          | 4.0 |     |     |     |
| 1442330_at   | Serine/arginine repetitive matrix 1                           | Srrm1                  | 4.0 |     |     |     |
| 1438928_x_at | ninjurin 1                                                    | Ninj1                  | 4.0 |     |     |     |
| 1419112_at   | nemo like kinase /// similar to nemo-like kinase              | LOC100044468 /// NIK   | 4.0 |     |     |     |
| 1454035_at   | RIKEN cDNA 3110009E22 gene                                    | 3110009E22Rik          | 4.0 |     |     |     |
| 1416723_at   | transcription factor 4                                        | Tcf4                   | 4.0 |     |     |     |
| 1436026_at   | zinc finger protein 703                                       | Zfp703                 | 4.0 |     |     |     |
| 1457552_at   | zinc finger protein 295                                       | Zfp295                 | 4.0 |     |     |     |
| 1459329_at   | tetratricopeptide repeat domain 7                             | Ttc7                   | 4.0 |     |     |     |
| 1438489_at   | Survival motor neuron 1                                       | Smn1                   | 4.0 |     |     |     |
| 1440120_at   | G protein, beta polypeptide 2 like 1                          | Gnb2l1                 | 3.9 |     |     |     |
| 1439079_a_at | ErbB2 interacting protein                                     | ErbB2ip                | 3.9 |     |     |     |
| 1430056_at   | RIKEN cDNA D130059P03 gene                                    | D130059P03Rik          | 3.9 |     |     |     |
| 1418011_a_at | SH3-domain GRB2-like B1 (endophilin)                          | Sh3glb1                | 3.9 |     |     |     |
| 1430428_at   | RIKEN cDNA 2310066F23 gene                                    | 2310066F23Rik          | 3.9 |     |     |     |
| 1446635_at   | DNA segment, Chr 13, ERATO Doi 476, expressed                 | D13Ert476e             | 3.9 |     |     |     |
| 1416618_at   | protoporphyrinogen oxidase                                    | Ppox                   | 3.9 |     |     |     |
| 1422105_at   | CD3 antigen, epsilon polypeptide                              | Cd3e                   | 3.9 |     |     |     |
| 1457429_s_at | gene model 106, (NCBI)                                        | Gm106                  | 3.9 |     |     |     |
| 1457029_at   | RIKEN cDNA C030010B13 gene                                    | C030010B13Rik          | 3.9 |     |     |     |
| 1417309_at   | transducer of ERBB2, 2                                        | Tob2                   | 3.9 |     |     |     |
| 1440290_at   | predicted gene, ENSMUSG00000056771                            | ENSMUSG00000056771     | 3.9 |     |     |     |
| 1442967_at   | expressed sequence AU020147                                   | AU020147               | 3.9 |     |     |     |
| 1438687_at   | lymphocyte transmembrane adaptor 1                            | Lax1                   | 3.9 |     |     |     |
| 1428216_s_at | translocase of outer mitochondrial membrane 7 homolog (yeast) | Tomm7                  | 3.9 |     |     |     |
| 1432974_at   | RIKEN cDNA 4933421H12 gene                                    | 4933421H12Rik          | 3.9 |     |     |     |
| 1460531_at   | RIKEN cDNA 2900069M18 gene                                    | 2900069M18Rik          | 3.9 |     |     |     |

| Probeset ID  | Gene Title                                                    | Gene Symbol               | 8mo | 60d | 21d | 6d  |
|--------------|---------------------------------------------------------------|---------------------------|-----|-----|-----|-----|
| 1420935_a_at | serine/arginine repetitive matrix 1                           | Srrm1                     | 3.9 |     |     |     |
| 1457628_at   | coiled-coil domain containing 53                              | Ccdc53                    | 3.9 |     |     |     |
| 1420493_a_at | phosphate cytidyltransferase 2, ethanolamine                  | Pcyt2                     | 3.9 |     |     |     |
| 1427283_at   | myeloid/lymphoid or mixed-lineage leukemia 1                  | Mll1                      | 3.9 |     |     |     |
| 1423989_at   | RIKEN cDNA 2210010N04 gene                                    | 2210010N04Rik             | 3.8 |     |     |     |
| 1450958_at   | transmembrane 4 superfamily member 1                          | Tm4sf1                    | 3.8 |     |     |     |
| 1440836_at   | SET domain containing 1B                                      | Setd1b                    | 3.8 |     |     |     |
| 1428403_at   | RIKEN cDNA 2410025L10 gene                                    | 2410025L10Rik             | 3.8 |     |     |     |
| 1441344_at   | ER lipid raft associated 1                                    | Erlin1                    | 3.8 |     |     |     |
| 1434760_at   | leucine rich repeat transmembrane neuronal 3                  | Lrrtm3                    | 3.8 |     |     |     |
| 1425290_at   | syntaxin 19                                                   | Stx19                     | 3.8 |     |     |     |
| 1427155_at   | FCH and double SH3 domains 1                                  | Fchsd1                    | 3.8 |     |     |     |
| 1449147_at   | carbohydrate (keratan sulfate Gal-6) sulfotransferase 1       | Chst1                     | 3.8 |     |     |     |
| 1441162_at   | Rho-associated coiled-coil containing protein kinase 1        | Rock1                     | 3.8 |     |     |     |
| 1427511_at   | Mus musculus, clone IMAGE:3590001                             | ---                       | 3.8 |     |     |     |
| 1429719_at   | forkhead box P4                                               | Foxp4                     | 3.8 |     |     |     |
| 1429407_at   | peroxisomal biogenesis factor 11c                             | Pex11c                    | 3.8 |     |     |     |
| 1428955_x_at | solute carrier family 9                                       | Slc9a3r2                  | 3.8 |     |     |     |
| 1431806_at   | RIKEN cDNA 4931408D14 gene                                    | 4931408D14Rik             | 3.8 |     |     |     |
| 1421374_a_at | FXYD domain-containing ion transport regulator 1              | Fxyd1                     | 3.8 |     |     |     |
| 1446543_at   | GCN1 general control of amino-acid synthesis 1-like 1 (yeast) | Gcn11                     | 3.8 |     |     |     |
| 1437571_at   | hypermethylated in cancer 2                                   | Hic2                      | 3.8 |     |     |     |
| 1432582_at   | RIKEN cDNA 3110054G05 gene                                    | 3110054G05Rik             | 3.8 |     |     |     |
| 1422028_a_at | E26 avian leukemia oncogene 1, 5' domain                      | Ets1                      | 3.8 |     |     |     |
| 1415728_at   | poly(A) binding protein, nuclear 1                            | Pabpn1                    | 3.8 |     |     |     |
| 1426406_at   | SET domain containing (lysine methyltransferase) 8            | Setd8                     | 3.7 |     |     |     |
| 1453539_at   | alkB, alkylation repair homolog 8 (E. coli)                   | Alkbh8                    | 3.7 |     |     |     |
| 1443862_at   | Mbt domain containing 1                                       | Mbt1                      | 3.7 |     |     |     |
| 1453706_at   | RIKEN cDNA 2900042A17 gene                                    | 2900042A17Rik             | 3.7 |     |     |     |
| 1453424_at   | FYVE and coiled-coil domain containing 1                      | Fyco1                     | 3.7 |     |     |     |
| 1425822_a_at | deltex 1 homolog (Drosophila)                                 | Dtx1                      | 3.7 |     |     |     |
| 1448471_a_at | cytotoxic T lymphocyte-associated protein 2 alpha             | Ctla2a                    | 3.7 |     |     |     |
| 1458828_at   | Expressed sequence AW146242                                   | AW146242                  | 3.7 |     |     |     |
| 1420197_at   | Growth arrest and DNA-damage-inducible 45 beta                | Gadd45b                   | 3.7 |     |     |     |
| 1435458_at   | proviral integration site 1                                   | Pim1                      | 3.7 |     |     |     |
| 1434199_at   | transmembrane protein 151B                                    | Tmem151b                  | 3.7 |     |     |     |
| 1423072_at   | RIKEN cDNA 6720475J19 gene                                    | 6720475J19Rik             | 3.7 |     |     |     |
| 1432978_at   | RIKEN cDNA 9030607L02 gene                                    | 9030607L02Rik             | 3.7 |     |     |     |
| 1418490_at   | serine dehydratase-like                                       | Sdsl                      | 3.7 |     |     |     |
| 1434396_a_at | myosin, light polypeptide 6, alkali, predicted                | EG667952 /// Myl6         | 3.7 |     |     |     |
| 1433127_at   | RIKEN cDNA 4930513L20 gene                                    | 4930513L20Rik             | 3.7 |     |     |     |
| 1430272_at   | GTP binding protein 5                                         | Gtpbp5                    | 3.7 |     |     |     |
| 1459664_at   | WD repeat domain 31                                           | Wdr31                     | 3.7 |     |     |     |
| 1422184_a_at | adenylate kinase 1                                            | Ak1                       | 3.7 |     |     | 2.7 |
| 1456765_at   | hypothetical protein 6430511F03                               | EG621083 /// RP23-448C18. | 3.7 |     |     |     |
| 1425172_at   | rhodopsin                                                     | Rho                       | 3.7 |     |     |     |

| Probeset ID  | Gene Title                                                    | Gene Symbol            | 8mo | 60d | 21d | 6d |
|--------------|---------------------------------------------------------------|------------------------|-----|-----|-----|----|
| 1446788_at   | RIKEN cDNA A430091L06 gene                                    | A430091L06Rik          | 3.7 |     |     |    |
| 1429053_at   | RIKEN cDNA 1110012J17 gene                                    | 1110012J17Rik          | 3.7 |     |     |    |
| 1440575_at   | heat shock protein 4                                          | Hspa4                  | 3.7 |     |     |    |
| 1433576_at   | methionine adenosyltransferase II, alpha                      | Mat2a                  | 3.7 |     |     |    |
| 1420558_at   | selectin, platelet                                            | Selp                   | 3.7 |     |     |    |
| 1438672_at   | parvin, beta                                                  | Parvb                  | 3.7 |     |     |    |
| 1446088_at   | RIKEN cDNA 9430081I23 gene                                    | 9430081I23Rik          | 3.7 |     |     |    |
| 1447631_at   | MYST histone acetyltransferase 2                              | Myst2                  | 3.6 |     |     |    |
| 1460364_at   | general transcription factor II I repeat domain-containing 1  | Gtf2ird1               | 3.6 |     |     |    |
| 1441763_at   | zinc finger, DHHC domain containing 6                         | Zdhhc6                 | 3.6 |     |     |    |
| 1456256_at   | eukaryotic translation initiation factor 5                    | Eif5                   | 3.6 |     |     |    |
| 1455564_at   | breakpoint cluster region homolog                             | Bcr                    | 3.6 |     |     |    |
| 1439080_at   | ErbB2 interacting protein                                     | ErbB2ip                | 3.6 |     |     |    |
| 1446941_at   | expressed sequence C78505                                     | C78505                 | 3.6 |     |     |    |
| 1459879_at   | RIKEN cDNA 4921513D23 gene                                    | 4921513D23Rik          | 3.6 |     |     |    |
| 1431284_a_at | spinster homolog 1 (Drosophila)                               | Spns1                  | 3.6 |     |     |    |
| 1455452_x_at | expressed sequence AI449310                                   | AI449310               | 3.6 |     |     |    |
| 1442171_at   | PRP40 pre-mRNA processing factor 40 homolog A (yeast)         | Prpf40a                | 3.6 |     |     |    |
| 1460456_at   | RIKEN cDNA 2010316F05 gene                                    | 2010316F05Rik          | 3.6 |     |     |    |
| 1424329_a_at | proline-rich Gla (G-carboxyglutamic acid) polypeptide 2       | Prrg2                  | 3.6 |     |     |    |
| 1444256_at   | RAE1 RNA export 1 homolog (S. pombe)                          | Rae1                   | 3.6 |     |     |    |
| 1426069_s_at | solute carrier family 7 , member 4                            | Slc7a4                 | 3.6 |     |     |    |
| 1430037_at   | sorting nexin family member 27                                | Snx27                  | 3.6 |     |     |    |
| 1459132_at   | basonuclin 2                                                  | Bnc2                   | 3.6 |     |     |    |
| 1420500_at   | DnaJ (Hsp40) homolog, subfamily C, member 1                   | Dnajc1                 | 3.6 |     |     |    |
| 1446575_at   | expressed sequence C77583                                     | C77583                 | 3.6 |     |     |    |
| 1427199_at   | furry homolog-like (Drosophila)                               | Fryl                   | 3.6 |     |     |    |
| 1423947_at   | RIKEN cDNA 1110008P14 gene                                    | 1110008P14Rik          | 3.6 |     |     |    |
| 1424907_a_at | phenylalanyl-tRNA synthetase, alpha subunit                   | Farsa                  | 3.6 |     |     |    |
| 1445343_at   | transmembrane emp24 protein transport domain containing 5     | Tmed5                  | 3.6 |     |     |    |
| 1428860_at   | RIKEN cDNA 4930572J05 gene                                    | 4930572J05Rik          | 3.6 |     |     |    |
| 1417670_at   | translocase of inner mitochondrial membrane 44                | Timm44                 | 3.6 |     |     |    |
| 1420467_at   | psoriasis susceptibility 1 candidate 2 (human)                | Psors1c2               | 3.6 |     |     |    |
| 1457293_at   | zinc finger and BTB domain containing 4                       | Zbtb4                  | 3.6 |     |     |    |
| 1454667_at   | sorting nexin 8                                               | Snx8                   | 3.6 |     |     |    |
| 1416870_at   | dynein, axonemal, light chain 4                               | Dnalc4                 | 3.5 |     |     |    |
| 1430807_at   | kelch-like 22 (Drosophila)                                    | Klhl22                 | 3.5 |     |     |    |
| 1448012_at   | predicted gene, EG546524                                      | EG546524               | 3.5 |     |     |    |
| 1421356_at   | testis expressed gene 9                                       | Tex9                   | 3.5 |     |     |    |
| 1456202_at   | leucine rich repeat and fibronectin type III, extracellular 2 | Elfn2                  | 3.5 |     |     |    |
| 1453097_a_at | upstream binding transcription factor, RNA polymerase I       | Ubf                    | 3.5 |     |     |    |
| 1419077_at   | MAGUK p55 subfamily member 3                                  | Mpp3                   | 3.5 |     |     |    |
| 1452406_x_at | erythroid differentiation regulator 1                         | Erdr1                  | 3.5 |     |     |    |
| 1423395_at   | translin-associated factor X                                  | LOC100039215 /// Tsnax | 3.5 |     |     |    |
| 1449832_at   | RIKEN cDNA 1700091H14 gene                                    | 1700091H14Rik          | 3.5 |     |     |    |
| 1451756_at   | FMS-like tyrosine kinase 1                                    | Flt1                   | 3.5 |     |     |    |

| Probeset ID  | Gene Title                                                    | Gene Symbol   | 8mo | 60d | 21d | 6d |
|--------------|---------------------------------------------------------------|---------------|-----|-----|-----|----|
| 1419329_at   | sorbin and SH3 domain containing 3                            | Sorbs3        | 3.5 |     |     |    |
| 1432200_at   | RIKEN cDNA C030044M21 gene                                    | C030044M21Rik | 3.5 |     |     |    |
| 1456443_at   | RIKEN cDNA 4930404N11 gene                                    | 4930404N11Rik | 3.5 |     |     |    |
| 1420588_at   | serine protease inhibitor-like, with Kunitz and WAP domains 1 | Spinlw1       | 3.5 |     |     |    |
| 1419156_at   | SRY-box containing gene 4                                     | Sox4          | 3.5 |     |     |    |
| 1439918_at   | outer dense fiber of sperm tails 2                            | Odf2          | 3.5 |     |     |    |
| 1453301_a_at | alkB, alkylation repair homolog 4 (E. coli)                   | Alkbh4        | 3.5 |     |     |    |
| 1448460_at   | activin A receptor, type 1                                    | Acvr1         | 3.5 |     |     |    |
| 1445229_at   | diacylglycerol O-acyltransferase 1                            | Dgat1         | 3.5 |     |     |    |
| 1433109_at   | macrophage migration inhibitory factor                        | Mif           | 3.5 |     |     |    |
| 1423667_at   | methionine adenosyltransferase II, alpha                      | Mat2a         | 3.5 |     |     |    |
| 1445244_at   | TM2 domain containing 1                                       | Tm2d1         | 3.5 |     |     |    |
| 1446558_at   | RIKEN cDNA F730015K02 gene                                    | F730015K02Rik | 3.5 |     |     |    |
| 1430633_s_at | RIKEN cDNA C430045I18 gene                                    | C430045I18Rik | 3.5 |     |     |    |
| 1438544_at   | RIKEN cDNA 1700001G11 gene                                    | 1700001G11Rik | 3.5 |     |     |    |
| 1435875_at   | protein kinase, AMP-activated, beta 2 non-catalytic subunit   | Prkab2        | 3.5 |     |     |    |
| 1418474_at   | RIKEN cDNA 1500005A01 gene                                    | 1500005A01Rik | 3.5 |     |     |    |
| 1415953_s_at | MAP/microtubule affinity-regulating kinase 2                  | Mark2         | 3.5 |     |     |    |
| 1439704_at   | histone deacetylase 2                                         | Hdac2         | 3.5 |     |     |    |
| 1426190_at   | activator of yeast meiotic promoters 1                        | Aym1          | 3.5 |     |     |    |
| 1445827_at   | Protein kinase C binding protein 1                            | Prkcbp1       | 3.5 |     |     |    |
| 1449493_at   | insulin-like 5                                                | InsI5         | 3.5 |     |     |    |
| 1422719_s_at | nucleoporin 50                                                | Nup50         | 3.5 |     |     |    |
| 1454711_at   | triple functional domain (PTPRF interacting)                  | Trio          | 3.4 |     |     |    |
| 1416628_at   | RIKEN cDNA 0610006I08 gene                                    | 0610006I08Rik | 3.4 |     |     |    |
| 1418712_at   | CDC42 effector protein (Rho GTPase binding) 5                 | Cdc42ep5      | 3.4 |     |     |    |
| 1417066_at   | chaperone, ABC1 activity of bc1 complex like (S. pombe)       | Cabc1         | 3.4 |     |     |    |
| 1420015_s_at | palmitoyl-protein thioesterase 1                              | Ppt1          | 3.4 |     |     |    |
| 1428168_at   | myelin protein zero-like 1                                    | Mpzl1         | 3.4 |     | 2.5 |    |
| 1437089_at   | RIKEN cDNA 4833409A17 gene                                    | 4833409A17Rik | 3.4 |     |     |    |
| 1417893_at   | sideroflexin 3                                                | Sfxn3         | 3.4 |     |     |    |
| 1435711_at   | expressed sequence AI480526                                   | AI480526      | 3.4 |     | 2.7 |    |
| 1432603_at   | nuclear receptor interacting protein 1                        | Nrip1         | 3.4 |     |     |    |
| 1436781_at   | mannosidase 2, alpha B1                                       | Man2b1        | 3.4 |     |     |    |
| 1420647_a_at | keratin 8                                                     | Krt8          | 3.4 |     |     |    |
| 1423005_a_at | espin                                                         | Espin         | 3.4 |     |     |    |
| 1454945_at   | centrosomal protein 97                                        | Cep97         | 3.4 |     |     |    |
| 1429432_at   | BAT2 domain containing 1                                      | Bat2d         | 3.4 |     |     |    |
| 1418188_a_at | metastasis associated lung adenocarcinoma transcript 1        | Malat1        | 3.4 |     | 5.1 |    |
| 1437065_at   | zinc finger and BTB domain containing 20                      | Zbtb20        | 3.4 |     |     |    |
| 1428024_at   | Microtubule-associated protein 1 light chain 3 beta           | Map1lc3b      | 3.4 |     |     |    |
| 1429276_at   | lupus brain antigen 1                                         | Lba1          | 3.4 |     |     |    |
| 1448260_at   | ubiquitin carboxy-terminal hydrolase L1                       | Uchl1         | 3.4 |     |     |    |
| 1449773_s_at | growth arrest and DNA-damage-inducible 45 beta                | Gadd45b       | 3.4 |     |     |    |
| 1434855_at   | amidohydrolase domain containing 2                            | Amdhd2        | 3.4 |     |     |    |
| 1435391_at   | proline rich 8                                                | Prr8          | 3.4 |     |     |    |

| Probeset ID  | Gene Title                                                                   | Gene Symbol             | 8mo | 60d | 21d | 6d |
|--------------|------------------------------------------------------------------------------|-------------------------|-----|-----|-----|----|
| 1459636_at   | angiopoietin 2                                                               | Angpt2                  | 3.4 |     |     |    |
| 1427514_at   | hypothetical protein LOC624295                                               | LOC624295               | 3.4 |     |     |    |
| 1429207_at   | RIKEN cDNA 5730408K05 gene                                                   | 5730408K05Rik           | 3.4 |     |     |    |
| 1443837_x_at | B-cell leukemia/lymphoma 2                                                   | Bcl2                    | 3.4 |     |     |    |
| 1427875_a_at | ribosomal protein L34 /// predicted gene                                     | LOC100048552 /// Rpl34  | 3.4 |     |     |    |
| 1456338_at   | solute carrier family 38, member 9                                           | Slc38a9                 | 3.4 |     |     |    |
| 1460448_s_at | tetratricopeptide repeat domain 14                                           | Ttc14                   | 3.4 |     |     |    |
| 1443504_at   | hypothetical protein E330022O07                                              | E330022O07              | 3.4 |     |     |    |
| 1457116_at   | REX1, RNA exonuclease 1 homolog (S. cerevisiae)                              | Rexo1                   | 3.3 |     |     |    |
| 1454268_a_at | cytochrome b-245, alpha polypeptide                                          | Cyba                    | 3.3 |     |     |    |
| 1452783_at   | fibronectin type III domain containing 3B                                    | Fndc3b                  | 3.3 |     |     |    |
| 1419188_s_at | chemokine (C-C motif) ligand 27                                              | Ccl27 /// LOC100039939  | 3.3 |     |     |    |
| 1421989_s_at | 3'-phosphoadenosine 5'-phosphosulfate synthase 2                             | Papss2                  | 3.3 |     |     |    |
| 1425902_a_at | nuclear factor of kappa light polypeptide gene enhancer in B-cells 2         | Nfkb2                   | 3.3 |     |     |    |
| 1417505_s_at | interleukin 11 receptor, alpha chain 1                                       | Il11ra1                 | 3.3 |     |     |    |
| 1420420_at   | hydroxyacid oxidase 1, liver                                                 | Hao1                    | 3.3 |     |     |    |
| 1424608_a_at | basic leucine zipper and W2 domains 2                                        | Bzw2 /// LOC100039204   | 3.3 |     |     |    |
| 1438165_x_at | vesicle amine transport protein 1 homolog (T californica)                    | Vat1                    | 3.3 |     |     |    |
| 1420635_a_at | T-cell, immune regulator 1, ATPase, H+ transporting, lysosomal V0 protein A3 | Tcrg1                   | 3.3 |     | 3.0 |    |
| 1428816_a_at | GATA binding protein 2                                                       | Gata2                   | 3.3 |     |     |    |
| 1437431_at   | Cut-like homeobox 1                                                          | Cux1                    | 3.3 |     |     |    |
| 1428139_at   | transmembrane protein 180                                                    | Tmem180                 | 3.3 |     |     |    |
| 1423860_at   | prostaglandin D2 synthase (brain)                                            | Ptgds                   | 3.3 |     |     |    |
| 1424472_at   | nucleolar protein family 6 (RNA-associated)                                  | Nol6                    | 3.3 |     |     |    |
| 1434500_at   | tweety homolog 2 (Drosophila)                                                | Ttyh2                   | 3.3 |     |     |    |
| 1443633_at   | RIKEN cDNA 1700086O06 gene                                                   | 1700086O06Rik           | 3.3 |     |     |    |
| 1438038_at   | RIKEN cDNA 4930402H24 gene                                                   | 4930402H24Rik           | 3.3 |     |     |    |
| 1429478_at   | RIKEN cDNA 6720463M24 gene                                                   | 6720463M24Rik           | 3.3 |     |     |    |
| 1423683_at   | cell division cycle associated 4                                             | Cdca4                   | 3.3 |     |     |    |
| 1428296_at   | polymerase (RNA) II (DNA directed) polypeptide L                             | LOC100048680 /// Polr2l | 3.3 |     |     |    |
| 1420851_at   | par-6 partitioning defective 6 homolog gamma (C. elegans)                    | Pard6g                  | 3.3 |     |     |    |
| 1444720_at   | expressed sequence AA408456                                                  | AA408456                | 3.3 |     |     |    |
| 1416104_at   | mannose-P-dolichol utilization defect 1                                      | Mpdu1                   | 3.3 |     |     |    |
| 1440913_at   | cDNA sequence BC037704                                                       | BC037704                | 3.3 |     |     |    |
| 1428306_at   | DNA-damage-inducible transcript 4                                            | Ddit4                   | 3.3 |     |     |    |
| 1453207_at   | RIKEN cDNA 2900053A13 gene                                                   | 2900053A13Rik           | 3.3 |     |     |    |
| 1423756_s_at | insulin-like growth factor binding protein 4                                 | Igfbp4                  | 3.2 |     |     |    |
| 1415746_at   | capicua homolog (Drosophila)                                                 | Cic                     | 3.2 |     |     |    |
| 1445438_at   | DDHD domain containing 1                                                     | Ddhd1                   | 3.2 |     |     |    |
| 1439938_at   | serine/threonine kinase 38                                                   | Stk38                   | 3.2 |     |     |    |
| 1439319_at   | E74-like factor 1                                                            | Elf1                    | 3.2 |     |     |    |
| 1438595_at   | gene model 546, (NCBI)                                                       | Gm546                   | 3.2 |     |     |    |
| 1430404_at   | RIKEN cDNA 4833416J08 gene                                                   | 4833416J08Rik           | 3.2 |     |     |    |
| 1451663_a_at | tripartite motif-containing 3                                                | Trim3                   | 3.2 |     |     |    |
| 1457148_at   | CUB and Sushi multiple domains 2                                             | Csmd2                   | 3.2 |     |     |    |
| 1427121_at   | F-box protein 4                                                              | Fbxo4                   | 3.2 |     |     |    |

| Probeset ID  | Gene Title                                                            | Gene Symbol           | 8mo | 60d | 21d | 6d |
|--------------|-----------------------------------------------------------------------|-----------------------|-----|-----|-----|----|
| 1426528_at   | neuropilin 2                                                          | Nrp2                  | 3.2 |     |     |    |
| 1438429_at   | RIKEN cDNA 2610319H10 gene                                            | 2610319H10Rik         | 3.2 |     |     |    |
| 1455717_s_at | dishevelled associated activator of morphogenesis 2                   | Daam2                 | 3.2 |     |     |    |
| 1452018_at   | NK2 transcription factor related, locus 6 (Drosophila)                | Nkx2-6                | 3.2 |     |     |    |
| 1455861_at   | erythrocyte protein band 4.1-like 5                                   | Epb4.1f5              | 3.2 |     |     |    |
| 1439633_at   | synaptotagmin VII                                                     | Syt7                  | 3.2 |     |     |    |
| 1434825_at   | trinucleotide repeat containing 18                                    | Tnrc18                | 3.2 |     |     |    |
| 1417160_s_at | Kallmann syndrome 1 sequence (human)                                  | Kal1                  | 3.2 |     |     |    |
| 1433004_at   | RIKEN cDNA 4833446E11 gene                                            | 4833446E11Rik         | 3.2 |     |     |    |
| 1459391_at   | ATP-binding cassette, sub-family A (ABC1), member 5                   | Abca5                 | 3.2 |     |     |    |
| 1422769_at   | synaptotagmin binding, cytoplasmic RNA interacting protein            | Syncrip               | 3.2 |     |     |    |
| 1442658_at   | NADH dehydrogenase (ubiquinone) 1 beta subcomplex, 2                  | Ndubf2                | 3.2 |     |     |    |
| 1455998_at   | similar to Zinc finger BED domain containing protein 4                | LOC667118             | 3.2 |     |     |    |
| 1420342_at   | ganglioside-induced differentiation-associated-protein 10             | Gdap10                | 3.2 |     |     |    |
| 1436841_at   | RIKEN cDNA B230380D07 gene                                            | B230380D07Rik         | 3.2 |     |     |    |
| 1457445_at   | trichorhinophalangeal syndrome I (human)                              | Trps1                 | 3.2 |     |     |    |
| 1437474_at   | GATA zinc finger domain containing 2B                                 | Gatad2b               | 3.2 |     |     |    |
| 1448950_at   | interleukin 1 receptor, type I                                        | Il1r1                 | 3.2 |     |     |    |
| 1444312_at   | solute carrier family 22, member 15                                   | Slc22a15              | 3.2 |     |     |    |
| 1448188_at   | uncoupling protein 2 (mitochondrial, proton carrier)                  | Ucp2                  | 3.2 |     |     |    |
| 1456024_at   | general transcription factor III C 1                                  | Gtf3c1                | 3.2 |     |     |    |
| 1442223_at   | Enabled homolog (Drosophila)                                          | Enah                  | 3.2 |     |     |    |
| 1431391_at   | Ral GEF with PH domain and SH3 binding motif 1                        | Ralgps1               | 3.2 |     |     |    |
| 1418391_at   | PHD finger protein 21A                                                | Phf21a                | 3.1 |     |     |    |
| 1424048_a_at | cytochrome b5 reductase 1                                             | Cyb5r1                | 3.1 |     | 2.2 |    |
| 1424920_at   | solute carrier family 37 (glycerol-3-phosphate transporter), member 3 | Slc37a3               | 3.1 |     |     |    |
| 1422670_at   | Rho family GTPase 2                                                   | Rnd2                  | 3.1 |     |     |    |
| 1451200_at   | kinesin family member 1B                                              | Kif1b                 | 3.1 |     |     |    |
| 1427331_at   | adenosine A1 receptor                                                 | Adora1                | 3.1 |     |     |    |
| 1429892_at   | PLAC8-like 1                                                          | Plac8l1               | 3.1 |     |     |    |
| 1420560_at   | cholinergic receptor, nicotinic, epsilon polypeptide                  | Chrne                 | 3.1 |     |     |    |
| 1451432_x_at | alkB, alkylation repair homolog 4 (E. coli)                           | Alkbh4                | 3.1 |     |     |    |
| 1428992_at   | unc-13 homolog D (C. elegans)                                         | Unc13d                | 3.1 |     |     |    |
| 1425869_a_at | presenilin 2                                                          | Psen2                 | 3.1 |     |     |    |
| 1456448_at   | MRNA containing B1 SINE-related sequence                              | ---                   | 3.1 |     |     |    |
| 1422695_at   | tweety homolog 1 (Drosophila)                                         | Ttyh1                 | 3.1 |     |     |    |
| 1427385_s_at | actinin, alpha 1                                                      | Actn1                 | 3.1 |     |     |    |
| 1451485_at   | RIKEN cDNA 3300001P08 gene                                            | 3300001P08Rik         | 3.1 |     |     |    |
| 1451341_s_at | transmembrane protein 189                                             | LOC620966 /// Tmem189 | 3.1 |     |     |    |
| 1424950_at   | SRY-box containing gene 9                                             | Sox9                  | 3.1 |     |     |    |
| 1416517_at   | patatin-like phospholipase domain containing 6                        | Pnpla6                | 3.1 |     |     |    |
| 1429849_at   | RIKEN cDNA 4632411B12 gene                                            | 4632411B12Rik         | 3.1 |     |     |    |
| 1429468_at   | RIKEN cDNA 1110018F16 gene                                            | 1110018F16Rik         | 3.1 |     |     |    |
| 1454296_at   | RIKEN cDNA 4631402F24 gene                                            | 4631402F24Rik         | 3.1 |     |     |    |
| 1453353_at   | RIKEN cDNA 1700047I16 gene                                            | 1700047I16Rik         | 3.1 |     |     |    |
| 1453191_at   | collagen, type XXVII, alpha 1                                         | Col27a1               | 3.1 |     |     |    |

| Probeset ID  | Gene Title                                                     | Gene Symbol                | 8mo | 60d | 21d | 6d  |
|--------------|----------------------------------------------------------------|----------------------------|-----|-----|-----|-----|
| 1426794_at   | protein tyrosine phosphatase, receptor type, S                 | Ptprs                      | 3.1 |     |     |     |
| 1438230_at   | protein geranylgeranyltransferase type I, beta subunit         | Pggt1b                     | 3.1 |     |     |     |
| 1429423_at   | RIKEN cDNA 4930518I15 gene                                     | 4930518I15Rik              | 3.1 |     |     |     |
| 1439905_at   | RIKEN cDNA A330062J17 gene                                     | A330062J17Rik              | 3.1 |     |     |     |
| 1427932_s_at | RIKEN cDNA 1200003I10 gene                                     | 1200003I10Rik /// E430024C | 3.1 |     |     |     |
| 1439159_at   | Arginine glutamic acid dipeptide (RE) repeats                  | Rere                       | 3.1 |     |     |     |
| 1428614_at   | lactate dehydrogenase D                                        | Ldhd                       | 3.1 |     |     |     |
| 1416683_at   | plexin B2                                                      | Plxnb2                     | 3.1 |     |     |     |
| 1456154_at   | Zinc finger protein 444                                        | Zfp444                     | 3.1 |     |     |     |
| 1440945_at   | Glucocorticoid induced transcript 1                            | Glicci1                    | 3.1 |     |     |     |
| 1435658_at   | solute carrier family 27 (fatty acid transporter), member 1    | Slc27a1                    | 3.1 |     |     |     |
| 1450045_at   | serine/arginine repetitive matrix 1                            | Srrm1                      | 3.1 |     |     |     |
| 1436918_at   | similar to Dual-specificity tyrosine-(Y)-kinase 2              | LOC100044376               | 3.1 |     |     |     |
| 1447343_at   | neuropilin 2                                                   | Nrp2                       | 3.1 |     |     |     |
| 1420524_a_at | mannan-binding lectin serine peptidase 2                       | Masp2                      | 3.1 |     |     |     |
| 1453445_at   | RIKEN cDNA 9030601B04 gene                                     | 9030601B04Rik              | 3.1 |     |     |     |
| 1448919_at   | CD302 antigen                                                  | Cd302                      | 3.1 | 2.3 | 2.9 |     |
| 1419097_a_at | stomatin                                                       | Stom                       | 3.1 |     |     |     |
| 1430288_x_at | ribosomal protein S21                                          | Rps21                      | 3.1 |     |     |     |
| 1416769_s_at | ATPase, H+ transporting, lysosomal V0 subunit B                | Atp6v0b                    | 3.1 |     |     |     |
| 1425261_at   | CCAAT/enhancer binding protein (C/EBP), gamma                  | Cebpg                      | 3.0 |     |     |     |
| 1450397_at   | microtubule-associated protein 1B                              | Mtap1b                     | 3.0 |     |     |     |
| 1423895_a_at | CUG triplet repeat, RNA binding protein 2                      | Cugbp2                     | 3.0 |     |     |     |
| 1458765_at   | RNA binding motif protein 10                                   | Rbm10                      | 3.0 |     |     |     |
| 1436362_x_at | CCR4 carbon catabolite repression 4-like (S. cerevisiae)       | Ccrn4l /// LOC100043775    | 3.0 |     | 5.5 |     |
| 1422598_at   | calsequestrin 1                                                | Casq1                      | 3.0 |     |     |     |
| 1435024_at   | RIKEN cDNA 4931428F04 gene                                     | 4931428F04Rik              | 3.0 |     |     |     |
| 1445201_at   | zinc finger protein 53                                         | Zfp53                      | 3.0 |     |     |     |
| 1455994_x_at | elongation of very long chain fatty acids (yeast)-like 1       | Elov1                      | 3.0 |     |     |     |
| 1438255_at   | forkhead box N3                                                | Foxn3                      | 3.0 |     |     |     |
| 1429805_at   | myosin IA                                                      | Myo1a                      | 3.0 |     |     |     |
| 1460534_at   | RIKEN cDNA 5530401A10 gene                                     | 5530401A10Rik              | 3.0 |     |     |     |
| 1449051_at   | peroxisome proliferator activated receptor alpha               | Ppara                      | 3.0 |     |     |     |
| 1418030_at   | solute carrier organic anion transporter family, member 3a1    | Slco3a1                    | 3.0 |     |     |     |
| 1418340_at   | Fc receptor, IgE, high affinity I, gamma polypeptide           | Fcer1g                     | 3.0 |     |     | 4.3 |
| 1439427_at   | claudin 9                                                      | Cldn9                      | 3.0 |     |     |     |
| 1416089_at   | ribosomal protein S15                                          | Rps15                      | 3.0 |     |     |     |
| 1456503_at   | nucleoporin 214                                                | Nup214                     | 3.0 |     |     |     |
| 1460681_at   | CEA-related cell adhesion molecule 1                           | Ceacam1                    | 3.0 |     |     |     |
| 1454524_at   | RIKEN cDNA 2310075M01 gene                                     | 2310075M01Rik              | 3.0 |     |     |     |
| 1436716_at   | Protein phosphatase 1, regulatory (inhibitor) subunit 14B      | Ppp1r14b                   | 3.0 |     |     |     |
| 1422527_at   | histocompatibility 2, class II, locus DMA                      | H2-DMA                     | 3.0 |     |     |     |
| 1456530_x_at | elongation of very long chain fatty acids (yeast)-like 1       | Elov1                      | 3.0 |     |     |     |
| 1427950_at   | zinc finger protein 294                                        | Zfp294                     | 3.0 |     |     |     |
| 1432454_at   | RIKEN cDNA 2410137M14 gene                                     | 2410137M14Rik              | 3.0 |     |     |     |
| 1456580_s_at | ATP synthase, H+ transporting, mitochondrial F1 complex, delta | Atp5d                      | 3.0 |     |     |     |

| Probeset ID  | Gene Title                                                           | Gene Symbol   | 8mo | 60d | 21d | 6d |
|--------------|----------------------------------------------------------------------|---------------|-----|-----|-----|----|
| 1426873_s_at | junction plakoglobin                                                 | Jup           | 3.0 |     |     |    |
| 1417389_at   | glypican 1                                                           | Gpc1          | 3.0 |     |     |    |
| 1416038_at   | staphylococcal nuclease and tudor domain containing 1                | Snd1          | 3.0 |     |     |    |
| 1419477_at   | C-type lectin domain family 2, member d                              | Clec2d        | 3.0 |     |     |    |
| 1456768_a_at | multimerin 2                                                         | Mmrn2         | 3.0 |     |     |    |
| 1456846_at   | predicted gene, EG382639                                             | EG382639      | 3.0 |     |     |    |
| 1436457_at   | RIKEN cDNA F830028O17 gene                                           | F830028O17Rik | 3.0 |     |     |    |
| 1448531_at   | lamin B2                                                             | Lmnb2         | 3.0 |     |     |    |
| 1428065_at   | solute carrier family 44, member 2                                   | Slc44a2       | 3.0 |     |     |    |
| 1453303_at   | RIKEN cDNA 4833417J20 gene                                           | 4833417J20Rik | 3.0 |     |     |    |
| 1432563_at   | RIKEN cDNA 1700116B05 gene                                           | 1700116B05Rik | 3.0 |     |     |    |
| 1424956_at   | AT hook, DNA binding motif, containing 1                             | Ahdc1         | 3.0 |     |     |    |
| 1456645_at   | WD repeat domain 25                                                  | Wdr25         | 3.0 |     |     |    |
| 1441519_at   | nidogen 1                                                            | Nid1          | 3.0 |     |     |    |
| 1425245_a_at | regulator of G-protein signaling 11                                  | Rgs11         | 3.0 |     |     |    |
| 1415977_at   | myo-inositol 1-phosphate synthase A1                                 | Isyna1        | 3.0 |     |     |    |
| 1427178_at   | transmembrane channel-like gene family 4                             | Tmc4          | 3.0 |     |     |    |
| 1451751_at   | DNA-damage-inducible transcript 4-like                               | Ddit4l        | 3.0 |     |     |    |
| 1457511_at   | regulator of G-protein signaling 12                                  | Rgs12         | 3.0 |     |     |    |
| 1445570_at   | NOL1/NOP2/Sun domain family, member 4                                | Nsun4         | 3.0 |     |     |    |
| 1430681_at   | crystallin, lambda 1                                                 | Cryl1         | 3.0 |     |     |    |
| 1452359_at   | RELT-like 1                                                          | Rell1         | 3.0 |     |     |    |
| 1427150_at   | myeloid/lymphoid or mixed-lineage leukemia 3                         | Mll3          | 3.0 |     |     |    |
| 1416331_a_at | nuclear factor, erythroid derived 2,-like 1                          | Nfe2l1        | 3.0 |     |     |    |
| 1458148_at   | NLR family, CARD domain containing 3                                 | Nlr3          | 3.0 |     |     |    |
| 1435550_at   | RIKEN cDNA C430014K11 gene                                           | C430014K11Rik | 3.0 |     |     |    |
| 1438736_at   | THO complex 2                                                        | Thoc2         | 3.0 |     |     |    |
| 1446235_at   | cDNA sequence BC002199                                               | BC002199      | 2.9 |     |     |    |
| 1438900_at   | SAC1 (suppressor of actin mutations 1, homolog)-like (S. cerevisiae) | Sacm1l        | 2.9 |     |     |    |
| 1457766_at   | WAP four-disulfide core domain 6A                                    | Wfdc6a        | 2.9 |     |     |    |
| 1418096_at   | docking protein 3                                                    | Dok3          | 2.9 |     |     |    |
| 1436943_at   | cytochrome b5 domain containing 2                                    | Cyb5d2        | 2.9 |     |     |    |
| 1452916_at   | WW domain binding protein 7                                          | Wbp7          | 2.9 |     |     |    |
| 1436095_at   | chromodomain helicase DNA binding protein 5                          | Chd5          | 2.9 |     |     |    |
| 1456912_at   | zinc finger protein 691                                              | Zfp691        | 2.9 |     |     |    |
| 1458802_at   | human immunodeficiency virus type I enhancer binding protein 3       | Hivep3        | 2.9 |     |     |    |
| 1432160_at   | G protein-coupled receptor kinase-interactor 2                       | Git2          | 2.9 |     |     |    |
| 1438979_s_at | RIKEN cDNA 1700029I15 gene                                           | 1700029I15Rik | 2.9 |     |     |    |
| 1439317_at   | KRIT1, ankyrin repeat containing                                     | Krit1         | 2.9 |     |     |    |
| 1453084_s_at | collagen, type XXII, alpha 1                                         | Col22a1       | 2.9 |     |     |    |
| 1423589_at   | actin related protein 2/3 complex, subunit 4                         | Arpc4         | 2.9 |     |     |    |
| 1458567_at   | RIKEN cDNA D130017N08 gene                                           | D130017N08Rik | 2.9 |     |     |    |
| 1434159_at   | serine/threonine kinase 4                                            | Stk4          | 2.9 |     |     |    |
| 1457900_at   | activating signal cointegrator 1 complex subunit 3                   | Ascc3         | 2.9 |     |     |    |
| 1435857_s_at | amyloid beta (A4) precursor-like protein 1                           | Aplp1         | 2.9 |     | 3.2 |    |
| 1417163_at   | dual specificity phosphatase 10                                      | Dusp10        | 2.9 |     |     |    |

| Probeset ID  | Gene Title                                                    | Gene Symbol           | 8mo | 60d | 21d | 6d  |
|--------------|---------------------------------------------------------------|-----------------------|-----|-----|-----|-----|
| 1428010_at   | translocase of inner mitochondrial membrane 9 homolog (yeast) | Timm9                 | 2.9 |     |     |     |
| 1422047_at   | cadherin 5                                                    | Cdh5                  | 2.9 |     |     |     |
| 1453210_at   | RIKEN cDNA 5730507C01 gene                                    | 5730507C01Rik         | 2.9 |     |     |     |
| 1444006_at   | SET domain containing 2                                       | Setd2                 | 2.9 |     |     |     |
| 1417930_at   | Ngfi-A binding protein 2                                      | Nab2                  | 2.9 |     |     |     |
| 1435510_at   | protein phosphatase 1H (PP2C domain containing)               | Ppm1h                 | 2.9 |     |     | 2.2 |
| 1421338_at   | E74-like factor 4 (ets domain transcription factor)           | Elf4 /// LOC100047149 | 2.9 |     |     |     |
| 1422615_at   | mitogen-activated protein kinase kinase kinase 4              | Map4k4                | 2.9 |     |     |     |
| 1455305_x_at | heterogeneous nuclear ribonucleoprotein A1                    | Hnrnpa1               | 2.9 |     |     |     |
| 1435253_at   | RAB11B, member RAS oncogene family                            | Rab11b                | 2.9 |     |     |     |
| 1438305_at   | regulating synaptic membrane exocytosis 1                     | Rims1                 | 2.9 |     |     |     |
| 1443573_at   | poly (ADP-ribose) polymerase family, member 1                 | Parp1                 | 2.9 |     |     |     |
| 1417858_at   | RAS protein activator like 1 (GAP1 like)                      | Rasal1                | 2.9 |     |     |     |
| 1421474_a_at | splA/ryanodine receptor domain and SOCS box containing 1      | Spsb1                 | 2.9 |     |     |     |
| 1425265_a_at | prion protein interacting protein 1                           | Prnpip1               | 2.9 |     |     |     |
| 1438194_at   | RIKEN cDNA 2900019G14 gene                                    | 2900019G14Rik         | 2.9 |     |     |     |
| 1445390_at   | PRKC, apoptosis, WT1, regulator                               | Pawr                  | 2.9 |     |     |     |
| 1420624_a_at | vesicle-associated membrane protein 8                         | Vamp8                 | 2.9 |     |     |     |
| 1454449_at   | Rab9 effector protein with kelch motifs                       | Rabepk                | 2.9 |     |     |     |
| 1428730_at   | KRIT1, ankyrin repeat containing                              | Krit1                 | 2.9 |     |     |     |
| 1424377_at   | cDNA sequence BC003885 /// predicted gene, EG623867           | BC003885 /// EG623867 | 2.9 |     |     |     |
| 1445206_at   | ZW10 homolog (Drosophila), centromere/kinetochore protein     | Zw10                  | 2.9 |     |     |     |
| 1421335_a_at | EGF-like domain 7                                             | Egfl7                 | 2.9 |     |     |     |
| 1425777_at   | calcium channel, voltage-dependent, beta 1 subunit            | Cacnb1                | 2.9 |     |     |     |
| 1423656_x_at | RIKEN cDNA 1500010J02 gene                                    | 1500010J02Rik         | 2.9 |     |     |     |
| 1416528_at   | SH3 domain binding glutamic acid-rich protein-like 3          | Sh3bgrl3              | 2.9 |     |     |     |
| 1438475_at   | cDNA sequence AB124611                                        | AB124611              | 2.9 |     |     |     |
| 1432959_at   | RIKEN cDNA 4930447I22 gene                                    | 4930447I22Rik         | 2.9 |     |     |     |
| 1443955_at   | RIKEN cDNA 1700094D03 gene                                    | 1700094D03Rik         | 2.9 |     |     |     |
| 1448402_at   | talin 1                                                       | Tln1                  | 2.9 |     |     |     |
| 1430277_at   | RIKEN cDNA 9430034F23 gene                                    | 9430034F23Rik         | 2.9 |     |     |     |
| 1422728_at   | inhibin alpha                                                 | Inha                  | 2.9 |     |     |     |
| 1440975_at   | matrix-remodelling associated 7                               | Mxra7                 | 2.9 |     |     |     |
| 1426825_at   | formin-like 3                                                 | Fmnl3                 | 2.9 |     |     |     |
| 1419126_at   | homeo box D9                                                  | Hoxd9                 | 2.9 |     | 3.5 | 4.4 |
| 1433935_at   | expressed sequence AU020206                                   | AU020206              | 2.8 |     | 2.1 |     |
| 1454636_at   | chromobox homolog 5 (Drosophila HP1a)                         | Cbx5                  | 2.8 |     |     |     |
| 1456424_s_at | phospholipid transfer protein                                 | Pltp                  | 2.8 |     |     |     |
| 1432669_at   | RIKEN cDNA 9030420N05 gene                                    | 9030420N05Rik         | 2.8 |     |     |     |
| 1426606_at   | cartilage acidic protein 1                                    | Crtac1                | 2.8 |     |     |     |
| 1428509_at   | myosin IE                                                     | Myo1e                 | 2.8 |     |     |     |
| 1459813_at   | RIKEN cDNA 1700012D01 gene                                    | 1700012D01Rik         | 2.8 |     |     |     |
| 1455220_at   | frequently rearranged in advanced T-cell lymphomas 2          | Frat2                 | 2.8 |     |     |     |
| 1435465_at   | kelch repeat and BTB (POZ) domain containing 11               | Kbtbd11               | 2.8 |     |     |     |
| 1432459_a_at | zinc finger and BTB domain containing 32                      | Zbtb32                | 2.8 |     |     |     |
| 1419684_at   | chemokine (C-C motif) ligand 8                                | Ccl8 /// LOC100048554 | 2.8 |     |     |     |

| Probeset ID  | Gene Title                                                        | Gene Symbol               | 8mo | 60d | 21d | 6d  |
|--------------|-------------------------------------------------------------------|---------------------------|-----|-----|-----|-----|
| 1428909_at   | RIKEN cDNA A130040M12 gene                                        | A130040M12Rik             | 2.8 |     |     |     |
| 1418924_at   | Ras association (RalGDS/AF-6) domain family (N-terminal) member 7 | Rassf7                    | 2.8 |     |     |     |
| 1444621_at   | IQ motif and Sec7 domain 2                                        | lqsec2                    | 2.8 |     |     |     |
| 1452217_at   | AHNAK nucleoprotein (desmoyokin)                                  | Ahnak                     | 2.8 |     |     |     |
| 1443170_at   | cyclin M1                                                         | Cnnm1                     | 2.8 |     | 3.7 |     |
| 1452566_at   | Mus musculus, clone IMAGE:3983821                                 | ---                       | 2.8 |     |     |     |
| 1455135_at   | RIKEN cDNA 2610014I16 gene                                        | 2610014I16Rik             | 2.8 |     |     |     |
| 1440870_at   | PR domain containing 16                                           | Prdm16                    | 2.8 |     |     |     |
| 1436270_at   | cytochrome b5 domain containing 1 /// similar to CG15429-PA       | Cyb5d1 /// LOC630700      | 2.8 |     |     |     |
| 1417839_at   | claudin 5                                                         | Cldn5                     | 2.8 |     |     |     |
| 1423973_a_at | ADP-ribosylation factor 3                                         | Arf3                      | 2.8 |     |     |     |
| 1436651_at   | PR domain containing 11                                           | Prdm11                    | 2.8 |     |     |     |
| 1426908_at   | UDP-N-acetyl-alpha-D-galactosamine                                | Galnt7                    | 2.8 |     |     |     |
| 1424581_at   | SH3 and cysteine rich domain 2                                    | Stac2                     | 2.8 |     |     |     |
| 1435299_at   | cyclin-dependent kinase 7                                         | Cdk7                      | 2.8 |     |     |     |
| 1421571_a_at | lymphocyte antigen 6 complex, locus C1                            | Ly6c1 /// Ly6c2           | 2.8 |     |     |     |
| 1422946_a_at | DNA methyltransferase (cytosine-5) 1                              | Dnmt1                     | 2.8 |     |     |     |
| 1435889_at   | MAP/microtubule affinity-regulating kinase 2                      | Mark2                     | 2.8 |     |     |     |
| 1452812_at   | latrophilin 1                                                     | Lphn1                     | 2.8 |     |     |     |
| 1416945_at   | prostate tumor over expressed gene 1                              | Ptov1                     | 2.8 |     |     |     |
| 1430911_at   | DNA segment, Chr 19, ERATO Doi 652, expressed                     | D19Erttd652e              | 2.8 |     |     |     |
| 1416924_at   | brain protein I3                                                  | Bri3                      | 2.8 |     |     |     |
| 1438533_at   | myosin IXb                                                        | Myo9b                     | 2.8 |     |     |     |
| 1432035_at   | RIKEN cDNA 4933427J07 gene                                        | 4933427J07Rik             | 2.8 |     |     |     |
| 1418241_at   | upstream transcription factor 2                                   | Usf2                      | 2.8 |     |     |     |
| 1420519_a_at | Era (G-protein)-like 1 (E. coli)                                  | Eral1                     | 2.8 |     |     |     |
| 1427247_at   | DNA segment, Chr 3, Brigham & Women's Genetics 0562 expressed     | D3Bwg0562e                | 2.8 |     |     |     |
| 1428201_at   | RIKEN cDNA 2310036O22 gene                                        | 2310036O22Rik             | 2.8 |     |     |     |
| 1430944_at   | RIKEN cDNA A930030B08 gene                                        | A930030B08Rik             | 2.8 |     |     |     |
| 1440553_at   | mitochondrial trans-2-enoyl-CoA reductase                         | Mecr                      | 2.8 |     | 3.8 |     |
| 1448320_at   | stromal interaction molecule 1                                    | LOC100045432 /// Stim1    | 2.8 |     |     |     |
| 1456703_at   | DNA segment, Chr 5, ERATO Doi 301, expressed                      | D5Erttd301e               | 2.8 |     |     |     |
| 1449618_s_at | RIKEN cDNA 2900092E17 gene                                        | 2900092E17Rik             | 2.8 |     |     |     |
| 1447839_x_at | adrenomedullin                                                    | Adm                       | 2.8 |     |     |     |
| 1429245_at   | RIKEN cDNA 2510022D24 gene                                        | 2510022D24Rik             | 2.8 |     |     |     |
| 1416184_s_at | high mobility group AT-hook 1                                     | Hmga1 /// Hmga1-rs1       | 2.8 |     |     |     |
| 1441508_at   | predicted gene, ENSMUSG00000062298                                | ENSMUSG00000062298        | 2.7 |     |     |     |
| 1418396_at   | G-protein signalling modulator 3 (AGS3-like, C. elegans)          | Gpsm3                     | 2.7 |     | 5.2 | 2.2 |
| 1440689_at   | forkhead box K2                                                   | Foxk2                     | 2.7 |     |     |     |
| 1444752_at   | RIKEN cDNA C230073G13 gene                                        | C230073G13Rik             | 2.7 |     |     |     |
| 1437829_s_at | eukaryotic elongation factor-2 kinase                             | Eef2k                     | 2.7 |     |     |     |
| 1419647_a_at | immediate early response 3                                        | Ier3                      | 2.7 |     |     |     |
| 1415942_at   | ribosomal protein 10                                              | EG234703 /// LOC100041501 | 2.7 |     |     |     |
| 1455167_at   | cytochrome c oxidase, subunit VIIIc                               | Cox8c                     | 2.7 |     |     |     |
| 1429918_at   | Rho GTPase activating protein 20                                  | Arhgap20                  | 2.7 |     |     |     |
| 1442183_at   | similar to Cdv3 protein                                           | LOC236069                 | 2.7 |     |     |     |

| Probeset ID  | Gene Title                                                    | Gene Symbol             | 8mo | 60d | 21d | 6d |
|--------------|---------------------------------------------------------------|-------------------------|-----|-----|-----|----|
| 1452364_at   | suppressor of zeste 12 homolog (Drosophila)                   | Suz12                   | 2.7 |     |     |    |
| 1423686_a_at | proline rich 13                                               | Prr13                   | 2.7 |     |     |    |
| 1454416_at   | RIKEN cDNA 5730575I04 gene                                    | 5730575I04Rik           | 2.7 |     |     |    |
| 1454865_at   | solute carrier family 9 (sodium/hydrogen exchanger), member 8 | Slc9a8                  | 2.7 |     |     |    |
| 1442518_at   | RIKEN cDNA C030044O21 gene                                    | C030044O21Rik           | 2.7 |     |     |    |
| 1433485_x_at | G protein-coupled receptor 56                                 | Gpr56                   | 2.7 |     |     |    |
| 1417216_at   | proviral integration site 2                                   | Pim2                    | 2.7 |     |     |    |
| 1417828_at   | aquaporin 8                                                   | Aqp8                    | 2.7 |     |     |    |
| 1448019_at   | RIKEN cDNA 2900006A08 gene /// TAO kinase 3                   | 2900006A08Rik /// Taok3 | 2.7 |     |     |    |
| 1433780_at   | ubiquitin 1                                                   | Ubn1                    | 2.7 |     |     |    |
| 1439106_at   | zinc finger protein 462                                       | Zfp462                  | 2.7 |     |     |    |
| 1455565_at   | B-cell CLL/lymphoma 9                                         | Bcl9                    | 2.7 |     |     |    |
| 1451387_s_at | cutA divalent cation tolerance homolog (E. coli)              | Cuta                    | 2.7 |     |     |    |
| 1434072_at   | Smith-Magenis syndrome chromosome region, candidate 7 (human) | Smcr7                   | 2.7 |     |     |    |
| 1434742_s_at | apoptosis-inducing factor, mitochondrion-associated 3         | Aifm3                   | 2.7 |     |     |    |
| 1428996_at   | RIKEN cDNA 4833426J09 gene                                    | 4833426J09Rik           | 2.7 |     |     |    |
| 1448094_at   | hypothetical LOC546100                                        | LOC546100               | 2.7 |     |     |    |
| 1457302_at   | Solute carrier family 20, member 2                            | Slc20a2                 | 2.7 |     |     |    |
| 1427865_at   | Beta globin                                                   | ---                     | 2.7 |     |     |    |
| 1428893_at   | oxysterol binding protein-like 7                              | Osbpl7                  | 2.7 |     |     |    |
| 1442267_at   | syntaxin binding protein 4                                    | Stxbp4                  | 2.7 |     |     |    |
| 1416134_at   | amyloid beta (A4) precursor-like protein 1                    | Aplp1                   | 2.7 |     | 2.2 |    |
| 1449836_x_at | Bcl2-interacting killer                                       | Bik                     | 2.7 |     |     |    |
| 1438967_x_at | anti-Mullerian hormone type 2 receptor                        | Amhr2                   | 2.7 |     |     |    |
| 1418153_at   | laminin, alpha 1                                              | Lama1                   | 2.7 |     |     |    |
| 1434619_at   | RIKEN cDNA 4932417H02 gene                                    | 4932417H02Rik           | 2.7 |     |     |    |
| 1452156_a_at | nischarin                                                     | Nisch                   | 2.7 |     |     |    |
| 1440077_at   | RIKEN cDNA 6330549D23 gene                                    | 6330549D23Rik           | 2.7 |     |     |    |
| 1435031_at   | transmembrane protein 120A                                    | Tmem120a                | 2.7 |     |     |    |
| 1427710_at   | coiled-coil domain containing 114                             | Ccdc114                 | 2.7 |     |     |    |
| 1436484_at   | RIKEN cDNA C030019I05 gene                                    | C030019I05Rik           | 2.7 |     |     |    |
| 1434450_s_at | adrenergic receptor kinase, beta 2                            | Adrbk2                  | 2.7 |     |     |    |
| 1434962_x_at | chemokine (C-C motif) ligand 27                               | Ccl27                   | 2.7 |     |     |    |
| 1454368_at   | proteasome (prosome, macropain) 26S subunit, non-ATPase, 7    | Psmc7                   | 2.7 |     |     |    |
| 1456985_at   | Deoxynucleotidyltransferase, terminal, interacting protein 1  | Dnttip1                 | 2.7 |     |     |    |
| 1438482_at   | WW domain containing E3 ubiquitin protein ligase 2            | Wwp2                    | 2.7 |     |     |    |
| 1437210_a_at | bromodomain containing 2                                      | Brd2                    | 2.7 |     |     |    |
| 1417914_at   | RAP2B, member of RAS oncogene family                          | Rap2b                   | 2.7 |     |     |    |
| 1416074_a_at | ribosomal protein L28 /// similar to ribosomal protein L28    | LOC100039731 /// Rpl28  | 2.7 |     |     |    |
| 1446315_at   | ATP citrate lyase                                             | Acly                    | 2.7 |     |     |    |
| 1459911_at   | cerebellar degeneration-related protein 2-like                | Cdr2l                   | 2.7 |     |     |    |
| 1443077_at   | RIKEN cDNA 1700081L11 gene                                    | 1700081L11Rik           | 2.7 |     |     |    |
| 1417362_at   | Rhesus blood group-associated C glycoprotein                  | Rhcg                    | 2.7 |     |     |    |
| 1418702_a_at | RIKEN cDNA 2810428I15 gene                                    | 2810428I15Rik           | 2.7 |     |     |    |
| 1453368_at   | RIKEN cDNA 2310003H01 gene                                    | 2310003H01Rik           | 2.7 |     |     |    |
| 1426399_at   | von Willebrand factor A domain containing 1                   | Vwa1                    | 2.6 |     |     |    |

| Probeset ID  | Gene Title                                                       | Gene Symbol            | 8mo | 60d | 21d | 6d  |
|--------------|------------------------------------------------------------------|------------------------|-----|-----|-----|-----|
| 1426858_at   | inhibin beta-B /// similar to Inhbb protein                      | Inhbb /// LOC100046802 | 2.6 |     |     |     |
| 1439874_at   | RIKEN cDNA 9330102E08 gene                                       | 9330102E08Rik          | 2.6 |     |     |     |
| 1421812_at   | TAP binding protein                                              | Tapbp                  | 2.6 |     |     |     |
| 1443820_x_at | elongation of very long chain fatty acids (yeast)-like 1         | Elov1                  | 2.6 |     |     |     |
| 1459619_at   | erythrocyte protein band 4.1-like 2                              | Epb4.1l2               | 2.6 |     |     |     |
| 1433873_s_at | pericentrin (kendrin)                                            | Pcnt                   | 2.6 |     |     |     |
| 1449474_a_at | nasal embryonic LHRH factor                                      | Nelf                   | 2.6 |     |     |     |
| 1418024_at   | NMDA receptor-regulated gene 1                                   | Narg1                  | 2.6 |     |     |     |
| 1421373_at   | cytochrome c oxidase subunit IV isoform 2                        | Cox4i2                 | 2.6 |     |     |     |
| 1427933_at   | vacuolar protein sorting 33B (yeast)                             | Vps33b                 | 2.6 |     |     |     |
| 1424671_at   | pleckstrin homology domain, with FYVE domain, member 1           | Plekhhf1               | 2.6 |     |     |     |
| 1437040_at   | ethanolamine kinase 2                                            | Etnk2                  | 2.6 |     |     |     |
| 1436586_x_at | ribosomal protein S14                                            | Rps14                  | 2.6 |     |     |     |
| 1454393_at   | DAZ interacting protein 3, zinc finger                           | Dzip3                  | 2.6 |     |     |     |
| 1449362_a_at | misshapen-like kinase 1 (zebrafish)                              | Mink1                  | 2.6 |     |     |     |
| 1425638_at   | centaurin, alpha 2                                               | Centa2                 | 2.6 |     |     |     |
| 1453810_at   | aftiphilin                                                       | Aftph                  | 2.6 |     |     |     |
| 1432820_at   | proteasome (prosome, macropain) 26S subunit, non-ATPase, 7       | Psmc7                  | 2.6 |     |     |     |
| 1419299_at   | RIKEN cDNA 2010012O05 gene                                       | 2010012O05Rik          | 2.6 |     |     |     |
| 1451069_at   | proviral integration site 3                                      | Pim3                   | 2.6 |     |     |     |
| 1444884_at   | palmitoyl-protein thioesterase 1                                 | Ppt1                   | 2.6 |     |     |     |
| 1416511_a_at | CDC42 effector protein (Rho GTPase binding) 4                    | Cdc42ep4               | 2.6 |     |     |     |
| 1421918_at   | acidic (leucine-rich) nuclear phosphoprotein 32 family, member A | Anp32a                 | 2.6 |     |     |     |
| 1443724_at   | junctophilin 3                                                   | Jph3                   | 2.6 |     |     |     |
| 1427109_at   | open reading frame 61                                            | ORF61                  | 2.6 |     |     |     |
| 1417431_a_at | sphingosine kinase 2                                             | Sphk2                  | 2.6 |     |     |     |
| 1443570_at   | COP9 homolog, subunit 3 (Arabidopsis)                            | Cops3                  | 2.6 |     |     |     |
| 1430905_at   | RIKEN cDNA 4921504E06 gene                                       | 4921504E06Rik          | 2.6 |     |     |     |
| 1438561_x_at | transmembrane protein 180                                        | Tmem180                | 2.6 |     |     |     |
| 1447376_at   | Moloney leukemia virus 10                                        | Mov10                  | 2.6 |     |     |     |
| 1438157_s_at | nuclear factor of kappa light polypeptide in B-cells inhibitor a | Nfkbia                 | 2.6 |     |     |     |
| 1450935_at   | excision repair cross-complementing rodent repair deficiency     | Erc5                   | 2.6 |     |     |     |
| 1450844_at   | syntaxin 6                                                       | Stx6                   | 2.6 |     |     |     |
| 1448655_at   | low density lipoprotein receptor-related protein 1               | Lrp1                   | 2.6 |     |     | 3.7 |
| 1442141_at   | cDNA sequence BC028454                                           | BC028454               | 2.6 |     |     |     |
| 1450826_a_at | serum amyloid A 3                                                | Saa3                   | 2.6 |     |     |     |
| 1426485_at   | UBX domain containing 2                                          | Ubx2                   | 2.6 |     |     |     |
| 1420401_a_at | receptor (calcitonin) activity modifying protein 3               | AB182283 /// Ramp3     | 2.6 |     |     |     |
| 1449205_at   | ovo-like 2 (Drosophila)                                          | Ovo2                   | 2.6 |     |     |     |
| 1423974_at   | nuclear mitotic apparatus protein 1                              | Numa1                  | 2.6 |     |     |     |
| 1453295_at   | additional sex combs like 2 (Drosophila)                         | Asxl2                  | 2.6 |     |     |     |
| 1426763_at   | ornithine decarboxylase antizyme 2                               | Oaz2                   | 2.6 |     |     |     |
| 1452415_at   | actinin, alpha 1                                                 | Actn1                  | 2.6 |     |     |     |
| 1460088_at   | RIKEN cDNA 6430531B16 gene                                       | 6430531B16Rik          | 2.6 |     |     |     |
| 1428289_at   | Kruppel-like factor 9 /// RIKEN cDNA 2310051E17 gene             | 2310051E17Rik /// Klf9 | 2.6 |     |     |     |
| 1424117_at   | cDNA sequence BC056474                                           | BC056474               | 2.6 |     |     |     |

| Probeset ID  | Gene Title                                                            | Gene Symbol            | 8mo | 60d | 21d | 6d  |
|--------------|-----------------------------------------------------------------------|------------------------|-----|-----|-----|-----|
| 1456066_a_at | RNA polymerase 1-4                                                    | Rpo1-4                 | 2.6 |     |     |     |
| 1454785_at   | dual specificity phosphatase 11 (RNA/RNP complex 1-interacting)       | Dusp11                 | 2.6 |     | 2.2 |     |
| 1454291_at   | RIKEN cDNA 4933428P19 gene                                            | 4933428P19Rik          | 2.6 |     |     |     |
| 1451422_at   | myosin XVIIIa                                                         | Myo18a                 | 2.6 |     |     | 2.1 |
| 1418711_at   | platelet derived growth factor, alpha                                 | Pdgfa                  | 2.6 |     |     |     |
| 1452092_at   | RIKEN cDNA 4631426J05 gene                                            | 4631426J05Rik          | 2.6 |     |     |     |
| 1431322_at   | immunoglobulin superfamily, member 3                                  | Igsf3                  | 2.6 |     |     |     |
| 1437117_at   | centaurin, beta 1                                                     | Centb1                 | 2.6 |     |     |     |
| 1419256_at   | spectrin beta 2                                                       | Spnb2                  | 2.6 |     | 2.4 |     |
| 1450374_at   | parathyroid hormone 2                                                 | Pth2                   | 2.6 |     |     |     |
| 1427703_at   | platelet-activating factor acetylhydrolase, isoform 1b, beta1 subunit | Pafah1b1               | 2.5 |     |     |     |
| 1423184_at   | intersectin 2                                                         | Itns2                  | 2.5 |     |     |     |
| 1435395_s_at | ATP synthase, H+ transporting, mitochondrial F0 complex               | Atp5j2                 | 2.5 |     |     |     |
| 1452905_at   | maternally expressed 3                                                | Meg3                   | 2.5 |     |     |     |
| 1438631_x_at | tetratricopeptide repeat domain 13                                    | Ttc13                  | 2.5 |     |     |     |
| 1428723_at   | RIKEN cDNA 2310047M10 gene                                            | 2310047M10Rik          | 2.5 |     |     |     |
| 1430980_a_at | eukaryotic translation initiation factor 4A1                          | Eif4a1                 | 2.5 |     |     |     |
| 1437447_s_at | excision repair cross-complementing rodent repair deficiency          | Erccl                  | 2.5 |     |     |     |
| 1423586_at   | AXL receptor tyrosine kinase                                          | Axl                    | 2.5 |     |     |     |
| 1422773_at   | myelin transcription factor 1                                         | Myt1                   | 2.5 |     |     |     |
| 1422064_a_at | zinc finger and BTB domain containing 20                              | Zbtb20                 | 2.5 |     |     |     |
| 1428778_at   | Sfi1 homolog, spindle assembly associated (yeast)                     | Sfi1                   | 2.5 |     |     |     |
| 1441062_at   | DEAD/H (Asp-Glu-Ala-Asp/His) box polypeptide 11                       | Ddx11                  | 2.5 |     |     |     |
| 1448056_at   | HECT, UBA and WWE domain containing 1                                 | Huwe1                  | 2.5 |     |     |     |
| 1430494_at   | RIKEN cDNA 2010005J08 gene                                            | 2010005J08Rik          | 2.5 |     |     |     |
| 1457616_at   | predicted gene, ENSMUSG00000074853                                    | ENSMUSG00000074853     | 2.5 |     |     |     |
| 1419089_at   | tissue inhibitor of metalloproteinase 3                               | Timp3                  | 2.5 |     |     |     |
| 1440316_at   | RIKEN cDNA 6430526N21 gene                                            | 6430526N21Rik          | 2.5 |     |     |     |
| 1460690_at   | cDNA sequence BC003940                                                | BC003940               | 2.5 |     |     |     |
| 1435823_x_at | EGF-like domain 7                                                     | Egfl7                  | 2.5 |     |     |     |
| 1451303_at   | cDNA sequence BC002230                                                | BC002230               | 2.5 |     |     |     |
| 1459922_at   | expressed sequence AI646383                                           | AI646383               | 2.5 |     |     |     |
| 1452708_a_at | Luc7 homolog (S. cerevisiae)-like                                     | Luc7l                  | 2.5 |     |     |     |
| 1453601_at   | zinc finger protein 710                                               | Zfp710                 | 2.5 |     |     |     |
| 1448112_at   | cytochrome c oxidase, subunit VIIc                                    | Cox7c /// LOC100041521 | 2.5 |     |     |     |
| 1417449_at   | acyl-CoA thioesterase 8                                               | Acot8                  | 2.5 |     |     |     |
| 1447585_s_at | mitochondrial ribosomal protein S6                                    | Mrps6                  | 2.5 |     |     |     |
| 1455682_at   | v-abl Abelson murine leukemia viral oncogene homolog 2                | Abl2                   | 2.5 |     |     |     |
| 1428651_at   | kelch-like 24 (Drosophila)                                            | Klhl24                 | 2.5 |     |     |     |
| 1431380_at   | RIKEN cDNA 5730409L17 gene                                            | 5730409L17Rik          | 2.5 |     |     |     |
| 1419122_at   | methyltransferase-like 1                                              | Mettl1                 | 2.5 |     |     |     |
| 1437013_x_at | ATPase, H+ transporting, lysosomal V0 subunit B                       | Atp6v0b                | 2.5 |     |     |     |
| 1435900_at   | zinc finger and BTB domain containing 43                              | Zbtb43                 | 2.5 |     |     |     |
| 1440225_at   | G protein-coupled receptor 116                                        | Gpr116                 | 2.5 |     |     |     |
| 1419866_s_at | ataxin 2 /// similar to ataxin 2                                      | Atxn2 /// LOC100047323 | 2.5 |     |     |     |
| 1454422_at   | RIKEN cDNA 4930456J16 gene                                            | 4930456J16Rik          | 2.5 |     |     |     |

| Probeset ID  | Gene Title                                                                         | Gene Symbol            | 8mo | 60d | 21d | 6d  |
|--------------|------------------------------------------------------------------------------------|------------------------|-----|-----|-----|-----|
| 1416088_a_at | ribosomal protein S15 /// similar to insulinoma protein (rig)                      | LOC100046223 /// Rps15 | 2.5 |     |     |     |
| 1421965_s_at | Notch gene homolog 3 (Drosophila)                                                  | Notch3                 | 2.5 |     |     |     |
| 1438590_at   | Rap guanine nucleotide exchange factor (GEF) 3                                     | Rapgef3                | 2.5 |     |     |     |
| 1434905_at   | NADH dehydrogenase (ubiquinone) 1 alpha subcomplex, 4-like 2                       | Ndufa4l2               | 2.5 |     |     |     |
| 1420911_a_at | milk fat globule-EGF factor 8 protein                                              | Mfge8                  | 2.5 |     |     |     |
| 1427338_at   | ciliary rootlet coiled-coil, rootletin                                             | Crocc                  | 2.5 |     |     |     |
| 1415865_s_at | 2,3-bisphosphoglycerate mutase                                                     | Bpgm                   | 2.5 |     |     |     |
| 1415758_at   | furry homolog-like (Drosophila)                                                    | Fryl                   | 2.5 |     |     |     |
| 1455351_at   | RIKEN cDNA 2610101N10 gene                                                         | 2610101N10Rik          | 2.5 |     |     |     |
| 1456174_x_at | N-myc downstream regulated gene 1                                                  | Ndrg1                  | 2.5 |     |     |     |
| 1419031_at   | fatty acid desaturase 2                                                            | Fads2                  | 2.5 |     |     |     |
| 1429850_x_at | alkB, alkylation repair homolog 4 (E. coli)                                        | Alkbh4                 | 2.5 |     |     |     |
| 1434202_a_at | cDNA sequence BC055107                                                             | BC055107               | 2.5 |     |     |     |
| 1417542_at   | ribosomal protein S6 kinase, polypeptide 2                                         | Rps6ka2                | 2.5 |     |     |     |
| 1416853_at   | neurochondrin                                                                      | Ncdn                   | 2.5 |     |     |     |
| 1428795_at   | RIKEN cDNA 1110021L09 gene                                                         | 1110021L09Rik          | 2.5 |     |     |     |
| 1441021_at   | LETM1 domain containing 1                                                          | Letmd1                 | 2.4 |     |     |     |
| 1424351_at   | WAP four-disulfide core domain 2                                                   | Wfdc2                  | 2.4 |     |     |     |
| 1437436_s_at | G protein-coupled receptor kinase 6                                                | Grk6                   | 2.4 |     |     |     |
| 1427089_at   | cyclin T2                                                                          | Ccnt2                  | 2.4 |     |     |     |
| 1424067_at   | intercellular adhesion molecule 1                                                  | Icam1                  | 2.4 |     |     |     |
| 1443384_at   | PTK2 protein tyrosine kinase 2                                                     | Ptk2                   | 2.4 |     |     |     |
| 1450391_a_at | monoglyceride lipase                                                               | Mgl1                   | 2.4 |     |     |     |
| 1437390_x_at | syntaxin 1A (brain)                                                                | Stx1a                  | 2.4 |     |     |     |
| 1444759_at   | prickle like 1 (Drosophila)                                                        | Prickle1               | 2.4 |     |     |     |
| 1436202_at   | metastasis associated lung adenocarcinoma transcript 1                             | Malat1                 | 2.4 |     | 2.1 | 3.7 |
| 1448483_a_at | NADH dehydrogenase (ubiquinone) 1 beta subcomplex, 2                               | Ndufb2                 | 2.4 |     |     |     |
| 1456062_at   | natriuretic peptide precursor type A                                               | Nppa                   | 2.4 |     |     |     |
| 1451928_a_at | RAD18 homolog (S. cerevisiae)                                                      | Rad18                  | 2.4 |     |     |     |
| 1429997_at   | RIKEN cDNA 4832441B07 gene                                                         | 4832441B07Rik          | 2.4 |     |     |     |
| 1420192_at   | transmembrane protein 191C                                                         | Tmem191c               | 2.4 |     |     |     |
| 1424145_at   | proline-rich polypeptide 3                                                         | Prr3                   | 2.4 |     |     |     |
| 1424477_at   | transmembrane protein 184a                                                         | Tmem184a               | 2.4 |     |     |     |
| 1436187_at   | RIKEN cDNA 1110054M08 gene                                                         | 1110054M08Rik          | 2.4 |     |     |     |
| 1432232_at   | REST corepressor 3                                                                 | Rcor3                  | 2.4 |     |     |     |
| 1419384_at   | protein interacting with C kinase 1                                                | Pick1                  | 2.4 |     |     |     |
| 1442793_s_at | transforming growth factor beta regulated gene 4                                   | Tbrg4                  | 2.4 |     |     |     |
| 1424762_at   | C1q and tumor necrosis factor related protein 5 /// membrane-type frizzled-related | C1qtnf5 /// Mfrp       | 2.4 |     |     |     |
| 1418846_at   | adaptor-related protein complex AP-4, mu 1                                         | Ap4m1                  | 2.4 |     |     |     |
| 1442446_at   | Similar to collagen, type VIII, alpha 2                                            | LOC100042764           | 2.4 |     |     |     |
| 1454860_x_at | defender against cell death 1                                                      | Dad1 /// LOC100044173  | 2.4 |     |     |     |
| 1428623_at   | plexin A1                                                                          | Plxna1                 | 2.4 |     |     |     |
| 1425536_at   | syntaxin 3                                                                         | Stx3                   | 2.4 |     |     |     |
| 1424454_at   | transmembrane protein 87A                                                          | Tmem87a                | 2.4 |     |     |     |
| 1427138_at   | coiled-coil domain containing 88C                                                  | Ccdc88c                | 2.4 |     |     |     |
| 1426422_at   | coiled-coil and C2 domain containing 1A                                            | Cc2d1a                 | 2.4 |     |     |     |

| Probeset ID  | Gene Title                                                          | Gene Symbol               | 8mo | 60d | 21d | 6d  |
|--------------|---------------------------------------------------------------------|---------------------------|-----|-----|-----|-----|
| 1453455_at   | calmodulin binding transcription activator 1                        | Camta1                    | 2.4 |     |     |     |
| 1436801_x_at | CDC42 effector protein (Rho GTPase binding) 4                       | Cdc42ep4                  | 2.4 |     |     |     |
| 1420526_at   | discoidin, CUB and LCCL domain containing 2                         | Dcbd2                     | 2.4 |     |     |     |
| 1433972_at   | calmodulin binding transcription activator 1                        | Camta1                    | 2.4 |     |     |     |
| 1418528_a_at | defender against cell death 1                                       | Dad1 /// LOC100044173     | 2.4 |     |     |     |
| 1433603_at   | NADH dehydrogenase (ubiquinone) Fe-S protein 6                      | Ndufs6                    | 2.4 |     |     |     |
| 1450965_at   | testis expressed gene 261                                           | Tex261                    | 2.4 |     |     |     |
| 1432064_at   | U box domain containing 5                                           | Ubox5                     | 2.4 |     |     |     |
| 1426526_s_at | oviductal glycoprotein 1                                            | Ovgp1                     | 2.4 |     |     |     |
| 1416656_at   | chloride intracellular channel 1                                    | Clic1                     | 2.4 |     |     |     |
| 1458449_at   | F-box and leucine-rich repeat protein 11                            | Fbxl11                    | 2.4 |     |     |     |
| 1460029_at   | GTP binding protein 5                                               | Gtpbp5                    | 2.4 |     |     |     |
| 1421163_a_at | nuclear factor I/A                                                  | Nfia                      | 2.4 |     |     |     |
| 1428126_a_at | RIKEN cDNA 4921506J03 gene                                          | 4921506J03Rik             | 2.4 |     |     |     |
| 1451381_at   | RIKEN cDNA 1810020D17 gene                                          | 1810020D17Rik             | 2.4 |     |     |     |
| 1417628_at   | suppressor of Ty 6 homolog (S. cerevisiae)                          | Supt6h                    | 2.4 |     |     |     |
| 1456421_at   | RIKEN cDNA 4930578M01 gene                                          | 4930578M01Rik             | 2.4 |     |     |     |
| 1437470_at   | Pbx/knotted 1 homeobox                                              | Pknox1                    | 2.4 |     |     |     |
| 1417969_at   | F-box protein 31                                                    | Fbxo31                    | 2.4 |     |     |     |
| 1458400_at   | RIKEN cDNA 9630050P21 gene                                          | 9630050P21Rik             | 2.4 |     |     |     |
| 1425067_at   | cadherin, EGF LAG seven-pass G-type receptor 3                      | Celsr3                    | 2.4 |     |     |     |
| 1424059_at   | suppressor of variegation 4-20 homolog 2 (Drosophila)               | Suv420h2                  | 2.4 |     |     |     |
| 1422440_at   | cyclin-dependent kinase 4                                           | Cdk4 /// LOC640611        | 2.4 |     |     |     |
| 1434059_at   | RIKEN cDNA B230312A22 gene                                          | B230312A22Rik             | 2.4 |     |     |     |
| 1424879_at   | leucine-rich repeats and calponin homology (CH) domain containing 4 | Lrch4 /// Sap25           | 2.4 |     |     |     |
| 1450981_at   | calponin 2                                                          | Cnn2                      | 2.4 |     |     |     |
| 1423087_a_at | prickle homolog 4 (Drosophila)                                      | LOC100047839 /// Prickle4 | 2.4 |     |     |     |
| 1427030_at   | coiled-coil domain containing 52                                    | Ccdc52                    | 2.4 |     |     |     |
| 1424849_at   | WD repeat domain 62                                                 | Wdr62                     | 2.4 |     |     |     |
| 1454283_at   | solute carrier family 38, member 9                                  | Slc38a9                   | 2.4 |     |     |     |
| 1427879_at   | RIKEN cDNA 1810031K17 gene                                          | 1810031K17Rik             | 2.4 |     |     |     |
| 1451184_at   | heterogeneous nuclear ribonucleoprotein A3                          | Hnrpa3 /// LOC100045099   | 2.4 |     |     |     |
| 1423601_s_at | Treacher Collins Franceschetti syndrome 1, homolog                  | Tcof1                     | 2.4 |     |     |     |
| 1442930_at   | expressed sequence AW061147                                         | AW061147                  | 2.4 |     |     |     |
| 1449770_x_at | transmembrane protein 191C                                          | Tmem191c                  | 2.4 |     |     |     |
| 1424590_at   | DEAD (Asp-Glu-Ala-Asp) box polypeptide 19b                          | Ddx19b                    | 2.4 |     |     |     |
| 1449876_at   | protein kinase, cGMP-dependent, type I                              | Prkg1                     | 2.4 |     |     |     |
| 1449041_a_at | thyroid hormone receptor interactor 6                               | Trip6                     | 2.4 |     |     |     |
| 1460227_at   | tissue inhibitor of metalloproteinase 1                             | Timp1                     | 2.4 |     |     |     |
| 1426543_x_at | endonuclease domain containing 1                                    | Endod1                    | 2.4 |     |     |     |
| 1452863_at   | RIKEN cDNA 1700003F12 gene                                          | 1700003F12Rik             | 2.4 |     |     |     |
| 1429650_at   | serine/threonine kinase 40                                          | Stk40                     | 2.4 |     |     |     |
| 1432393_a_at | tRNA-histidine guanylyltransferase 1-like (S. cerevisiae)           | Thg1l                     | 2.4 |     |     |     |
| 1449027_at   | ras homolog gene family, member U                                   | Rhou                      | 2.4 |     |     | 2.2 |
| 1445765_at   | RIKEN cDNA 9430011C21 gene                                          | 9430011C21Rik             | 2.4 |     |     |     |
| 1417877_at   | endonuclease/exonuclease/phosphatase family domain containing 1     | Eepd1                     | 2.4 |     |     |     |

| Probeset ID  | Gene Title                                                           | Gene Symbol   | 8mo | 60d | 21d | 6d |
|--------------|----------------------------------------------------------------------|---------------|-----|-----|-----|----|
| 1459741_x_at | uncoupling protein 2 (mitochondrial, proton carrier)                 | Ucp2          | 2.4 |     |     |    |
| 1440178_x_at | zeta-chain (TCR) associated protein kinase                           | Zap70         | 2.4 |     |     |    |
| 1429835_at   | RIKEN cDNA 2310033E01 gene                                           | 2310033E01Rik | 2.4 |     |     |    |
| 1419213_at   | N-acetyltransferase 6                                                | Nat6          | 2.4 |     |     |    |
| 1419196_at   | hepcidin antimicrobial peptide                                       | Hamp          | 2.4 |     |     |    |
| 1427090_at   | zinc finger, BED domain containing 4                                 | Zbed4         | 2.4 |     |     |    |
| 1460424_at   | transmembrane protein 160                                            | Tmem160       | 2.4 |     |     |    |
| 1418881_at   | N-terminal EF-hand calcium binding protein 2                         | Necab2        | 2.4 |     |     |    |
| 1433776_at   | lipoma HMGIC fusion partner                                          | Lhfp          | 2.4 |     |     |    |
| 1426681_at   | unkempt homolog (Drosophila)                                         | Unk           | 2.3 |     |     |    |
| 1418448_at   | Harvey rat sarcoma oncogene, subgroup R                              | Rras          | 2.3 |     |     |    |
| 1448688_at   | podocalyxin-like                                                     | Podxl         | 2.3 |     |     |    |
| 1418975_at   | NCK interacting protein with SH3 domain                              | Nckipsd       | 2.3 |     |     |    |
| 1453268_at   | tRNA-histidine guanylyltransferase 1-like (S. cerevisiae)            | Thg1l         | 2.3 |     |     |    |
| 1445102_at   | RIKEN cDNA B930096M23 gene                                           | B930096M23Rik | 2.3 |     |     |    |
| 1443362_at   | zinc finger protein 277                                              | Zfp277        | 2.3 |     |     |    |
| 1455271_at   | hypothetical protein LOC620695                                       | LOC620695     | 2.3 |     |     |    |
| 1419072_at   | glutathione S-transferase, mu 7                                      | Gstm7         | 2.3 |     |     |    |
| 1430671_a_at | RIKEN cDNA 0610010K06 gene                                           | 0610010K06Rik | 2.3 |     |     |    |
| 1458748_at   | RNA binding motif protein 27                                         | Rbm27         | 2.3 |     |     |    |
| 1460594_a_at | GDP-mannose pyrophosphorylase A                                      | Gmppa         | 2.3 |     |     |    |
| 1444323_at   | cyclin D3                                                            | Ccnd3         | 2.3 |     |     |    |
| 1424062_at   | ubiquitin-conjugating enzyme E2D 1, UBC4/5 homolog (yeast)           | Ube2d1        | 2.3 |     |     |    |
| 1418518_at   | furin (paired basic amino acid cleaving enzyme)                      | Furin         | 2.3 |     |     |    |
| 1418305_s_at | nucleolar protein family A, member 1 (H/ACA small nucleolar RNPs)    | Nola1         | 2.3 |     |     |    |
| 1458643_at   | deltex 1 homolog (Drosophila)                                        | Dtx1          | 2.3 |     |     |    |
| 1458215_at   | SET domain, bifurcated 1                                             | Setdb1        | 2.3 |     |     |    |
| 1441464_at   | RIKEN cDNA A630035D09 gene                                           | A630035D09Rik | 2.3 |     |     |    |
| 1418670_s_at | perlecan (heparan sulfate proteoglycan 2)                            | Hspg2         | 2.3 |     |     |    |
| 1437283_at   | transportin 2 (importin 3, karyopherin beta 2b)                      | Tnpo2         | 2.3 |     |     |    |
| 1423432_at   | pleckstrin homology domain interacting protein                       | Phip          | 2.3 |     |     |    |
| 1429267_at   | acyl-CoA thioesterase 11                                             | Acot11        | 2.3 |     |     |    |
| 1417224_a_at | CD2 antigen (cytoplasmic tail) binding protein 2                     | Cd2bp2        | 2.3 |     |     |    |
| 1442599_at   | solute carrier family 12 (potassium/chloride transporters), member 9 | Slc12a9       | 2.3 |     |     |    |
| 1420668_a_at | Yip1 domain family, member 2                                         | Yipf2         | 2.3 |     |     |    |
| 1421385_a_at | myosin VIIa                                                          | Myo7a         | 2.3 |     |     |    |
| 1417240_at   | zyxin                                                                | Zyx           | 2.3 |     |     |    |
| 1451357_at   | MPN domain containing                                                | Mpnd          | 2.3 |     |     |    |
| 1442687_at   | RIKEN cDNA 1700064N11 gene                                           | 1700064N11Rik | 2.3 |     |     |    |
| 1454907_at   | Small EDRK-rich factor 1                                             | Serf1         | 2.3 |     |     |    |
| 1439053_at   | hypothetical protein LOC100045050                                    | LOC100045050  | 2.3 |     | 4.7 |    |
| 1421817_at   | glutathione reductase                                                | Gsr           | 2.3 |     |     |    |
| 1429646_at   | RIKEN cDNA 1700112C13 gene                                           | 1700112C13Rik | 2.3 |     |     |    |
| 1456165_at   | RIKEN cDNA 4921521F21 gene                                           | 4921521F21Rik | 2.3 |     |     |    |
| 1460548_a_at | Era (G-protein)-like 1 (E. coli)                                     | Eral1         | 2.3 |     |     |    |
| 1454757_s_at | DNA segment, Chr 12, ERATO Doi 647, expressed                        | D12ErtD647e   | 2.3 |     |     |    |

|              |                                                                   |                       |     |     |
|--------------|-------------------------------------------------------------------|-----------------------|-----|-----|
| 1422397_a_at | interleukin 15 receptor, alpha chain                              | Il15ra                | 2.3 |     |
| 1458879_at   | expressed sequence C76798                                         | C76798                | 2.3 |     |
| 1424760_a_at | SET and MYND domain containing 2                                  | Smyd2                 | 2.3 |     |
| 1451648_a_at | folate receptor 2 (fetal)                                         | Folr2                 | 2.3 |     |
| 1455059_at   | helicase with zinc finger domain                                  | Helz                  | 2.3 | 2.2 |
| 1416954_at   | solute carrier family 25                                          | Slc25a10              | 2.3 |     |
| 1455152_at   | expressed sequence AI462493                                       | AI462493              | 2.3 |     |
| 1434179_at   | myeloid/lymphoid or mixed-lineage leukemia 3                      | MLL3                  | 2.3 | 3.4 |
| 1435115_at   | fibronectin type III domain containing 5                          | Fndc5                 | 2.3 |     |
| 1428183_at   | ankyrin repeat domain 23                                          | Ankrd23               | 2.3 |     |
| 1455458_x_at | GDP-mannose pyrophosphorylase A                                   | Gmppa                 | 2.3 |     |
| 1454086_a_at | LIM domain only 2 /// similar to LIM domain only 2                | Lmo2 /// LOC100048263 | 2.3 |     |
| 1434920_a_at | Ena-vasodilator stimulated phosphoprotein                         | Evl /// LOC100047333  | 2.3 |     |
| 1448624_at   | CD2 antigen (cytoplasmic tail) binding protein 2                  | Cd2bp2                | 2.3 |     |
| 1426025_s_at | lysosomal-associated protein transmembrane 5                      | Laptm5                | 2.3 |     |
| 1416352_s_at | glycoprotein, synaptic 2                                          | Gpsn2                 | 2.3 |     |
| 1428193_at   | ubiquitin specific peptidase 9, X chromosome                      | Usp9x                 | 2.3 |     |
| 1444656_at   | cDNA sequence BC030499                                            | BC030499              | 2.3 |     |
| 1425718_a_at | influenza virus NS1A binding protein                              | Ivns1abp              | 2.3 |     |
| 1445613_at   | Nuclear receptor subfamily 2, group C, member 2                   | Nr2c2                 | 2.3 |     |
| 1456194_a_at | Parkinson disease (autosomal recessive, early onset) 7            | Park7                 | 2.3 |     |
| 1418625_s_at | glyceraldehyde-3-phosphate dehydrogenase                          | 3000002C10Rik         | 2.3 |     |
| 1440315_at   | muscleblind-like 1 (Drosophila)                                   | Mbn1                  | 2.3 |     |
| 1444370_at   | expressed sequence C77058                                         | C77058                | 2.3 |     |
| 1438474_at   | ankyrin repeat domain 35                                          | Ankrd35               | 2.3 |     |
| 1421556_at   | serine (or cysteine) peptidase inhibitor, clade A, member 3A      | Serpina3a             | 2.3 |     |
| 1459890_s_at | RIKEN cDNA 1110008P14 gene                                        | 1110008P14Rik         | 2.3 |     |
| 1431554_a_at | annexin A9                                                        | Anxa9                 | 2.3 |     |
| 1433180_at   | MORN repeat containing 1                                          | Morn1                 | 2.3 |     |
| 1417212_at   | RIKEN cDNA 9530058B02 gene                                        | 9530058B02Rik         | 2.3 |     |
| 1423575_a_at | Williams Beuren syndrome chromosome region 22                     | Wbscr22               | 2.3 |     |
| 1428670_at   | hypothetical gene LOC72520                                        | LOC72520              | 2.3 |     |
| 1442445_at   | RIKEN cDNA 2610027H17 gene                                        | 2610027H17Rik         | 2.3 |     |
| 1459912_at   | mitogen-activated protein kinase kinase kinase 4                  | Map4k4                | 2.3 |     |
| 1445197_x_at | expressed sequence C79595                                         | C79595                | 2.3 |     |
| 1445930_at   | fibronectin type III domain containing 7                          | Fndc7                 | 2.3 |     |
| 1421938_at   | serine hydrolase-like                                             | Serhl                 | 2.3 |     |
| 1419798_at   | RIKEN cDNA 2610019E17 gene                                        | 2610019E17Rik         | 2.3 |     |
| 1423957_at   | interferon stimulated exonuclease gene 20-like 1                  | Isg20l1               | 2.3 |     |
| 1457002_at   | zinc finger protein 408                                           | Zfp408                | 2.3 |     |
| 1454103_at   | dynein, axonemal, heavy chain 2                                   | Dnahc2                | 2.2 |     |
| 1436725_at   | RIKEN cDNA E130306D19 gene                                        | E130306D19Rik         | 2.2 |     |
| 1443817_x_at | NK2 transcription factor related, locus 6 (Drosophila)            | Nkx2-6                | 2.2 |     |
| 1425406_at   | C-type lectin domain family 4, member a2                          | Clec4a2               | 2.2 |     |
| 1428785_at   | angiomin-like 1                                                   | Amotl1                | 2.2 |     |
| 1436632_at   | RIKEN cDNA D130059P03 gene                                        | D130059P03Rik         | 2.2 |     |
| 1455811_at   | eukaryotic translation initiation factor 3, subunit E interacting | Elf3eip               | 2.2 |     |

|              |                                                                                  |                       |     |
|--------------|----------------------------------------------------------------------------------|-----------------------|-----|
| 1417000_at   | ankyrin repeat and BTB (POZ) domain containing 1                                 | Abtb1                 | 2.2 |
| 1417636_at   | solute carrier family 6 , member 9                                               | Slc6a9                | 2.2 |
| 1447703_x_at | zinc finger protein 593                                                          | Zfp593                | 2.2 |
| 1418478_at   | LIM domain only 1                                                                | Lmo1                  | 2.2 |
| 1436817_at   | exocyst complex component 5                                                      | Exoc5                 | 2.2 |
| 1455035_s_at | nucleolar protein 5A                                                             | Nol5a                 | 2.2 |
| 1426871_at   | F-box protein 33                                                                 | Fbxo33                | 2.2 |
| 1440795_x_at | rabaptin, RAB GTPase binding effector protein 2                                  | Rabep2                | 2.2 |
| 1422715_s_at | acid phosphatase 1, soluble                                                      | Acp1 /// LOC631286    | 2.2 |
| 1423887_a_at | TEL2, telomere maintenance 2, homolog (S. cerevisiae)                            | Telo2                 | 2.2 |
| 1450688_at   | ral guanine nucleotide dissociation stimulator-like 2                            | Rgl2                  | 2.2 |
| 1451139_at   | solute carrier family 39 (zinc transporter), member 4                            | Slc39a4               | 2.2 |
| 1437226_x_at | MARCKS-like 1                                                                    | Marcksl1              | 2.2 |
| 1453776_at   | sorting nexin family member 21                                                   | Snx21                 | 2.2 |
| 1451351_at   | tetratricopeptide repeat domain 13                                               | Ttc13                 | 2.2 |
| 1422027_a_at | E26 avian leukemia oncogene 1, 5' domain                                         | Ets1                  | 2.2 |
| 1432374_a_at | DNA segment, Chr 5, Wayne State University 178, expressed                        | D5Wsu178e             | 2.2 |
| 1455711_at   | deltex 4 homolog (Drosophila)                                                    | Dtx4                  | 2.2 |
| 1448387_at   | ring-box 1                                                                       | Rbx1                  | 2.2 |
| 1416489_at   | phosphatidylinositol 4-kinase type 2 beta                                        | Pi4k2b                | 2.2 |
| 1424544_at   | nuclear receptor binding protein 2                                               | Nrbp2                 | 2.2 |
| 1459405_at   | IQ motif containing GTPase activating protein 3                                  | Iqgap3                | 2.2 |
| 1416852_a_at | neurochondrin                                                                    | Ncdn                  | 2.2 |
| 1435669_at   | zinc finger protein 532                                                          | Zfp532                | 2.2 |
| 1432831_at   | coiled-coil domain containing 138                                                | Ccdc138               | 2.2 |
| 1455562_at   | SRY-box containing gene 12                                                       | Sox12                 | 2.2 |
| 1436746_at   | WNK lysine deficient protein kinase 1                                            | Wnk1                  | 2.2 |
| 1436149_at   | cytochrome c oxidase, subunit Vb                                                 | Cox5b                 | 2.2 |
| 1455886_at   | Casitas B-lineage lymphoma                                                       | Cbl /// LOC100048010  | 2.2 |
| 1434147_at   | RELT-like 2                                                                      | Rel2                  | 2.2 |
| 1428578_s_at | protein tyrosine phosphatase, receptor (PTPRF), interacting                      | Ppfia4                | 2.2 |
| 1429456_a_at | polymerase (RNA) III (DNA directed) polypeptide E                                | Polr3e                | 2.2 |
| 1427689_a_at | TNFAIP3 interacting protein 1                                                    | Tnip1                 | 2.2 |
| 1454680_at   | DNA segment, Chr 5, ERATO Doi 579, expressed                                     | D5Erd579e             | 2.2 |
| 1420717_at   | RIKEN cDNA A930018P22 gene                                                       | A930018P22Rik         | 2.2 |
| 1438274_at   | IKAROS family zinc finger 4                                                      | Ikzf4                 | 2.2 |
| 1431323_at   | leucine zipper transcription factor-like 1                                       | Lztf1                 | 2.2 |
| 1457351_at   | TAF2 RNA polymerase II transcription factor                                      | Taf2                  | 2.2 |
| 1428936_at   | ATPase, Ca++ transporting, plasma membrane 1                                     | Atp2b1                | 2.2 |
| 1426631_at   | pseudouridylate synthase 7 homolog (S. cerevisiae) /// hypothetical protein LOC1 | LOC100047009 /// Pus7 | 2.2 |
| 1432719_at   | RIKEN cDNA 4833412K13 gene                                                       | 4833412K13Rik         | 2.2 |
| 1426249_at   | adrenergic receptor kinase, beta 1                                               | Adrbk1                | 2.2 |
| 1427298_at   | dynamamin 3, opposite strand                                                     | Dnm3os                | 2.2 |
| 1441056_at   | ubiquitin specific peptidase 3                                                   | Usp3                  | 2.2 |
| 1418031_at   | myosin IXb                                                                       | Myo9b                 | 2.2 |
| 1460015_at   | spermatogenesis and oogenesis specific basic helix-loop-helix 1                  | Sohlh1                | 2.2 |
| 1451810_at   | open reading frame 63                                                            | ORF63                 | 2.2 |

|                  |                                                                              |                         |     |     |
|------------------|------------------------------------------------------------------------------|-------------------------|-----|-----|
| 1429705_at       | sperm acrosome associated 4                                                  | Spaca4                  | 2.2 |     |
| 1418835_at       | pleckstrin homology-like domain, family A, member 1                          | Phlda1                  | 2.2 |     |
| 1433753_x_at     | Era (G-protein)-like 1 (E. coli)                                             | Eral1                   | 2.2 |     |
| 1430982_at       | splicing factor, arginine/serine-rich 1 (ASF/SF2)                            | LOC100048559 /// Sfrs1  | 2.2 |     |
| 1437706_x_at     | ribosomal protein S14 /// predicted gene, EG545121                           | EG545121 /// Rps14      | 2.2 |     |
| 1434959_at       | desert hedgehog                                                              | Dhh                     | 2.2 |     |
| 1419743_s_at     | coactivator-associated arginine methyltransferase 1                          | Carm1                   | 2.2 |     |
| 1423448_at       | RAB11B, member RAS oncogene family                                           | Rab11b                  | 2.2 |     |
| 1438552_x_at     | zyxin                                                                        | Zyx                     | 2.2 |     |
| 1440034_at       | signal transducing adaptor molecule (SH3 domain and ITAM motif) 2            | Stam2                   | 2.2 |     |
| 1455731_at       | solute carrier family 29 (nucleoside transporters), member 3                 | Slc29a3                 | 2.2 |     |
| 1451255_at       | lipolysis stimulated lipoprotein receptor                                    | Lsr                     | 2.2 |     |
| 1440817_x_at     | zinc finger protein 771 /// similar to crooked legs CG14938-PB               | LOC100047782 /// Zfp771 | 2.2 |     |
| 1445278_at       | gametogenetin                                                                | Ggn                     | 2.2 |     |
| 1438236_at       | nuclear factor I/A                                                           | Nfia                    | 2.2 |     |
| 1416416_x_at     | glutathione S-transferase, mu 1                                              | Gstm1                   | 2.2 | 2.3 |
| 1460718_s_at     | mitochondrial carrier homolog 1 (C. elegans)                                 | Mtch1                   | 2.2 |     |
| 1447469_at       | coiled-coil domain containing 66                                             | Ccdc66                  | 2.2 |     |
| 1423852_at       | shisa homolog 2 (Xenopus laevis)                                             | Shisa2                  | 2.2 |     |
| 1418389_at       | RIKEN cDNA 2810453I06 gene                                                   | 2810453I06Rik           | 2.2 |     |
| 1457531_a_at     | RIKEN cDNA A930017K11 gene                                                   | A930017K11Rik           | 2.2 |     |
| 1435163_at       | RIKEN cDNA 9030612M13 gene                                                   | 9030612M13Rik           | 2.2 |     |
| 1422536_at       | troponin I, cardiac                                                          | Tnni3                   | 2.2 |     |
| 1436339_at       | RIKEN cDNA 1810058I24 gene                                                   | 1810058I24Rik           | 2.2 |     |
| 1436074_at       | nuclear factor of kappa light polypeptide in B-cells inhibitor               | Nfkbid                  | 2.2 |     |
| 1422726_x_at     | spermatogenesis associated glutamate (E)-rich protein 4a                     | Speer4a                 | 2.2 | 5.0 |
| 1442409_at       | DNA segment, Chr 9, Wayne State University 90, expressed                     | D9Wsu90e                | 2.2 |     |
| 1432590_at       | RIKEN cDNA 4930573O21 gene                                                   | 4930573O21Rik           | 2.2 |     |
| 1453297_at       | RIKEN cDNA 4933417O08 gene                                                   | 4933417O08Rik           | 2.1 |     |
| 1435613_x_at     | cytochrome c oxidase, subunit Vb                                             | Cox5b /// LOC100045602  | 2.1 |     |
| 1419867_a_at     | eukaryotic translation initiation factor 4E binding protein 3                | Ankhd1 /// Eif4ebp3     | 2.1 |     |
| 1455500_at       | ring finger protein 213 /// hypothetical LOC672511                           | LOC672511 /// Rnf213    | 2.1 |     |
| 1445149_at       | Poliovirus receptor                                                          | Pvr                     | 2.1 |     |
| 1415676_a_at     | proteasome (prosome, macropain) subunit, beta type 5                         | Psmb5                   | 2.1 |     |
| 1449491_at       | caspase recruitment domain family, member 10                                 | Card10                  | 2.1 |     |
| 1416968_a_at     | hydroxy-delta-5-steroid dehydrogenase, 3 beta- and steroid delta-isomerase 7 | Hsd3b7                  | 2.1 |     |
| 1451197_s_at     | GATA zinc finger domain containing 2A                                        | Gatad2a                 | 2.1 |     |
| 1448330_at       | glutathione S-transferase, mu 1                                              | Gstm1                   | 2.1 | 2.1 |
| 1454960_at       | MAD homolog 3 (Drosophila)                                                   | Smad3                   | 2.1 |     |
| 1439156_at       | gene model 962, (NCBI)                                                       | Gm962                   | 2.1 |     |
| 1421911_at       | signal transducer and activator of transcription 2                           | Stat2                   | 2.1 |     |
| AFFX-GapdhMur/M3 | glyceraldehyde-3-phosphate dehydrogenase                                     | Gapdh                   | 2.1 |     |
| 1419403_at       | cDNA sequence BC017612                                                       | BC017612                | 2.1 |     |
| 1454316_at       | RIKEN cDNA 5830426C09 gene                                                   | 5830426C09Rik           | 2.1 |     |
| 1455569_at       | CDNA clone IMAGE:1548559                                                     | ---                     | 2.1 |     |
| 1419685_at       | UPF1 regulator of nonsense transcripts homolog (yeast)                       | Upf1                    | 2.1 |     |
| 1423749_s_at     | RAN GTPase activating protein 1                                              | Rangap1                 | 2.1 |     |

|              |                                                                     |                        |     |     |
|--------------|---------------------------------------------------------------------|------------------------|-----|-----|
| 1437859_x_at | eukaryotic translation initiation factor 5A                         | Eif5a                  | 2.1 |     |
| 1433712_at   | expressed sequence AW555464                                         | AW555464               | 2.1 |     |
| 1430517_at   | RIKEN cDNA 4930544O15 gene                                          | 4930544O15Rik          | 2.1 |     |
| 1454825_at   | RIKEN cDNA 1110014N23 gene                                          | 1110014N23Rik          | 2.1 |     |
| 1418375_at   | methyl-CpG binding domain protein 6                                 | Mbd6                   | 2.1 |     |
| 1416050_a_at | scavenger receptor class B, member 1                                | Scarb1                 | 2.1 |     |
| 1435628_x_at | cDNA sequence BC005512 /// hypothetical protein LOC215866           | BC005512 /// EG641366  | 2.1 |     |
| 1444657_at   | NEDD4 binding protein 2                                             | N4bp2                  | 2.1 |     |
| 1460362_at   | RIKEN cDNA 2410001C21 gene                                          | 2410001C21Rik          | 2.1 |     |
| 1455857_a_at | RAB2B, member RAS oncogene family                                   | Rab2b                  | 2.1 |     |
| 1428364_at   | sodium channel modifier 1                                           | Scnm1                  | 2.1 |     |
| 1430247_at   | dishevelled associated activator of morphogenesis 2                 | Daam2                  | 2.1 |     |
| 1416582_a_at | Bcl-associated death promoter                                       | Bad                    | 2.1 |     |
| 1460673_at   | folylpolyglutamyl synthetase                                        | Fpgs                   | 2.1 |     |
| 1432872_at   | RIKEN cDNA 4932702M13 gene                                          | 4932702M13Rik          | 2.1 |     |
| 1418482_at   | cytochrome b-561 domain containing 2                                | Cyb561d2               | 2.1 |     |
| 1417288_at   | pleckstrin homology domain-containing, family A                     | Plekha2                | 2.1 |     |
| 1424469_a_at | cleavage and polyadenylation specific factor 4                      | Cpsf4                  | 2.1 |     |
| 1417108_at   | kinesin light chain 4                                               | Klc4                   | 2.1 |     |
| 1430279_at   | RIKEN cDNA 3110038A09 gene                                          | 3110038A09Rik          | 2.1 |     |
| 1420191_s_at | transmembrane protein 191C                                          | Tmem191c               | 2.1 |     |
| 1431944_at   | RIKEN cDNA 4930484H19 gene                                          | 4930484H19Rik          | 2.1 |     |
| 1420520_x_at | Era (G-protein)-like 1 (E. coli)                                    | Eral1                  | 2.1 |     |
| 1426600_at   | solute carrier family 2 (facilitated glucose transporter), member 1 | Slc2a1                 | 2.1 |     |
| 1454717_at   | ankyrin repeat domain 27 (VPS9 domain)                              | Ankrd27                | 2.1 |     |
| 1417608_a_at | ribosomal protein L13a                                              | Rpl13a                 | 2.1 |     |
| 1448498_at   | ribosomal protein S6 kinase, polypeptide 4                          | Rps6ka4                | 2.1 |     |
| 1417799_at   | ATPase, H+ transporting, lysosomal V1 subunit G2                    | Atp6v1g2               | 2.1 |     |
| 1457730_at   | Fanconi anemia, complementation group M                             | Fancm                  | 2.1 |     |
| 1435182_at   | coiled-coil domain containing 61                                    | Ccdc61                 | 2.1 |     |
| 1452190_at   | prolylcarboxypeptidase (angiotensinase C)                           | Prcp                   | 2.1 |     |
| 1424384_a_at | zinc and ring finger 1                                              | Znrf1                  | 2.1 |     |
| 1428867_at   | exocyst complex component 3-like 2                                  | Exoc3l2                | 2.1 |     |
| 1418553_at   | rho/rac guanine nucleotide exchange factor (GEF) 18                 | Arhgef18               | 2.1 | 2.2 |
| 1416765_s_at | mitochondria protein for granulocyte-macrophage colony-stimulation  | LOC100042179/// Magmas | 2.1 |     |
| 1425523_at   | RNA binding motif protein 25                                        | Rbm25                  | 2.1 |     |
| 1452120_at   | N-acetyltransferase 11                                              | Nat11                  | 2.1 |     |
| 1416580_a_at | STIP1 homology and U-Box containing protein 1                       | Stub1                  | 2.1 |     |
| 1426744_at   | sterol regulatory element binding factor 2                          | Srebf2                 | 2.1 |     |
| 1433777_at   | l(3)mbt-like 2 (Drosophila)                                         | L3mbt2                 | 2.1 |     |
| 1420074_at   | DNA segment, Chr 8, ERATO Doi 738, expressed                        | D8Erttd738e            | 2.1 |     |
| 1427578_a_at | eukaryotic translation initiation factor 6                          | Eif6                   | 2.1 |     |
| 1440882_at   | low density lipoprotein receptor-related protein 8                  | Lrp8                   | 2.1 |     |
| 1438542_at   | Transformation related protein 53                                   | Trp53                  | 2.1 |     |
| 1441979_at   | cDNA sequence BC060267                                              | BC060267               | 2.1 |     |
| 1429531_at   | sphingomyelin phosphodiesterase 4                                   | Smpd4                  | 2.1 |     |
| 1422965_at   | angiotensin II, type I receptor-associated protein                  | Agtrap                 | 2.1 |     |

|              |                                                                    |                      |     |     |
|--------------|--------------------------------------------------------------------|----------------------|-----|-----|
| 1423914_at   | RIKEN cDNA C630004H02 gene                                         | C630004H02Rik        | 2.1 |     |
| 1434804_at   | exocyst complex component 6B                                       | Exoc6b               | 2.1 |     |
| 1423632_at   | G protein-coupled receptor 146                                     | Gpr146               | 2.1 |     |
| 1451168_a_at | Rho GDP dissociation inhibitor (GDI) alpha                         | Arhgdia              | 2.1 |     |
| 1423992_at   | GATA zinc finger domain containing 2A                              | Gatad2a              | 2.1 |     |
| 1417040_a_at | Bcl-2-related ovarian killer protein                               | Bok                  | 2.1 |     |
| 1454708_at   | actin-binding LIM protein 1                                        | Ablim1               | 2.1 |     |
| 1455651_at   | telomeric repeat binding factor 2                                  | Terf2                | 2.1 |     |
| 1427236_a_at | myeloid/lymphoid or mixed-lineage leukemia 5                       | Mll5                 | 2.1 |     |
| 1449553_at   | Na <sup>+</sup> /K <sup>+</sup> transporting ATPase interacting 1  | Nkain1               | 2.1 |     |
| 1448345_at   | translocase of outer mitochondrial membrane 34                     | Tomm34               | 2.1 |     |
| 1424138_at   | rhomboid family 1 (Drosophila)                                     | Rhbdf1               | 2.1 |     |
| 1438192_s_at | bromodomain adjacent to zinc finger domain, 2A                     | Baz2a                | 2.1 |     |
| 1444518_at   | Acyl-Coenzyme A oxidase 1, palmitoyl                               | Acox1                | 2.1 |     |
| 1417287_at   | histocompatibility 13                                              | H13                  | 2.1 |     |
| 1449076_x_at | acireductone dioxygenase 1                                         | Adi1                 | 2.1 |     |
| 1459179_at   | DNA segment, Chr 8, ERATO Doi 268, expressed                       | D8Ertd268e           | 2.1 |     |
| 1434805_at   | myeloid/lymphoid or mixed-lineage leukemia (trithorax, Drosophila) | Mllt1                | 2.1 |     |
| 1418508_a_at | growth factor receptor bound protein 2                             | Grb2                 | 2.1 |     |
| 1448960_at   | CXXC finger 5                                                      | Cxxc5                | 2.1 |     |
| 1451528_at   | transmembrane protein 82                                           | Tmem82               | 2.1 |     |
| 1443684_at   | predicted gene, ENSMUSG00000058045                                 | ENSMUSG00000058045   | 2.1 |     |
| 1428516_a_at | alkB, alkylation repair homolog 7 (E. coli)                        | Alkbh7               | 2.1 |     |
| 1426461_at   | UDP-glucose pyrophosphorylase 2                                    | Ugp2                 | 2.1 | 2.7 |
| 1435002_at   | zinc finger protein 507                                            | zfp507               | 2.1 |     |
| 1436640_x_at | 1-acylglycerol-3-phosphate O-acyltransferase 4                     | Agpat4               | 2.1 |     |
| 1420760_s_at | N-myc downstream regulated gene 1                                  | Ndr1                 | 2.1 |     |
| 1435414_s_at | dynactin 1                                                         | Dctn1                | 2.0 |     |
| 1441098_at   | poly(A)-specific ribonuclease (PARN)-like domain containing 1      | Pnlnc1               | 2.0 |     |
| 1428448_a_at | Mpv17 transgene, kidney disease mutant                             | Gtf3c2 /// Mpv17     | 2.0 |     |
| 1443632_at   | obscurin, cytoskeletal calmodulin and titin-interacting RhoGEF     | Obscn                | 2.0 |     |
| 1440823_x_at | Smoothelin-like 2                                                  | Smtnl2               | 2.0 |     |
| 1426192_at   | SWI/SNF related, regulator of chromatin                            | Smarcd2              | 2.0 |     |
| 1429124_s_at | REX1, RNA exonuclease 1 homolog (S. cerevisiae)                    | Rex1                 | 2.0 |     |
| 1428748_at   | RIKEN cDNA 5830428H23 gene                                         | 5830428H23Rik        | 2.0 |     |
| 1454415_at   | scaffold attachment factor B                                       | Safb                 | 2.0 |     |
| 1460447_at   | pseudouridylate synthase 7 homolog (S. cerevisiae)-like            | Pus7l                | 2.0 |     |
| 1417154_at   | solute carrier family 25 (mitochondrial carrier, brain), member 14 | Slc25a14             | 2.0 |     |
| 1451500_at   | Usher syndrome 1C binding protein 1                                | Ushbp1               | 2.0 |     |
| 1424775_at   | 2'-5' oligoadenylate synthetase 1A                                 | Oas1a                | 2.0 |     |
| 1437664_at   | homeo box D3                                                       | Hoxd3                | 2.0 |     |
| 1435039_a_at | phosphatidylinositol-4-phosphate 5-kinase, type 1 alpha            | Pip5k1a              | 2.0 |     |
| 1425812_a_at | calcium channel, voltage-dependent, N type, alpha 1B subunit       | Cacna1b              | 2.0 |     |
| 1438763_at   | dynein, axonemal, heavy chain 2                                    | Dnahc2               | 2.0 |     |
| 1430830_at   | RIKEN cDNA A430105J06 gene                                         | A430105J06Rik        | 2.0 |     |
| 1417490_at   | cathepsin B                                                        | Ctsb                 | 2.0 | 2.0 |
| 1455665_at   | LON peptidase N-terminal domain and ring finger 1                  | LOC631639 /// Lonrf1 | 2.0 |     |

| Probeset ID  | Gene Title                                                        | Gene Symbol            | 8mo | 60d | 21d  | 6d   |
|--------------|-------------------------------------------------------------------|------------------------|-----|-----|------|------|
| 1452258_at   | PHD finger protein 20                                             | Phf20                  | 2.0 |     |      |      |
| 1435364_at   | cysteine and histidine rich 1                                     | Cyhr1                  | 2.0 |     |      |      |
| 1431084_x_at | RIKEN cDNA 1810014B01 gene                                        | 1810014B01Rik          | 2.0 |     |      |      |
| 1448643_at   | Sjogren's syndrome nuclear autoantigen 1                          | Ssna1                  | 2.0 |     |      |      |
| 1424457_at   | amyloid beta (A4) precursor protein-binding, family B, member 3   | Apbb3                  | 2.0 |     |      |      |
| 1428635_at   | catechol-O-methyltransferase domain containing 1                  | Comtd1                 | 2.0 |     |      |      |
| 1428327_at   | trafficking protein, kinesin binding 1                            | Trak1                  | 2.0 |     |      |      |
| 1451073_at   | signal peptide peptidase 3                                        | Sppl3                  | 2.0 |     |      |      |
| 1440122_at   | predicted gene, EG666504                                          | EG666504               | 2.0 |     |      |      |
| 1458085_at   | UBX domain containing 5                                           | Ubx5                   | 2.0 |     |      |      |
| 1448222_x_at | cytochrome c oxidase, subunit VIIIa                               | Cox8a                  | 2.0 |     |      |      |
| 1455630_at   | dynein, axonemal, light chain 1                                   | Dnal1                  | 2.0 |     |      |      |
| 1432340_at   | RIKEN cDNA 1700121N20 gene                                        | 1700121N20Rik          | 2.0 |     |      |      |
| 1437359_at   | ribonucleic acid binding protein S1                               | Rnps1                  | 2.0 |     |      |      |
| 1416112_at   | cytochrome c oxidase, subunit VIIIa                               | Cox8a                  | 2.0 |     |      |      |
| 1428405_at   | host cell factor C1 regulator 1 (XPO1-dependent)                  | Hcfc1r1                | 2.0 |     |      |      |
| 1419100_at   | serine (or cysteine) peptidase inhibitor, clade A, member 3N      | Serpina3n              | 2.0 |     |      |      |
| 1436996_x_at | lysozyme 1                                                        | Lyz1                   |     |     | 17.9 | 59.9 |
| 1419561_at   | chemokine (C-C motif) ligand 3                                    | Ccl3                   |     |     | 32.3 | 44.4 |
| 1419872_at   | colony stimulating factor 1 receptor                              | Csf1r                  |     |     | 9.5  | 36.7 |
| 1418126_at   | chemokine (C-C motif) ligand 5                                    | Ccl5                   |     |     | 5.5  | 33.9 |
| 1417017_at   | cytochrome P450, family 17, subfamily a, polypeptide 1            | Cyp17a1                |     |     |      | 30.9 |
| 1439426_x_at | lysozyme 1                                                        | Lyz1                   |     |     | 13.1 | 28.5 |
| 1450783_at   | interferon-induced protein with tetratricopeptide repeats 1       | Ifit1                  |     |     | 5.9  | 27.5 |
| 1437726_x_at | complement component 1, q subcomponent, beta polypeptide          | C1qb                   |     |     | 31.0 | 25.7 |
| 1450430_at   | mannose receptor, C type 1                                        | Mrc1                   |     |     | 5.1  | 24.5 |
| 1448453_at   | hydroxy-d-5-steroid dehydrogenase, 3 b- and steroid d-isomerase 1 | Hsd3b1                 |     |     |      | 22.6 |
| 1457666_s_at | interferon activated gene 202B                                    | Ifi202b                |     |     | 3.4  | 21.9 |
| 1417936_at   | chemokine (C-C motif) ligand 9                                    | Ccl9                   |     |     | 16.7 | 21.1 |
| 1423547_at   | lysozyme 2                                                        | Lyz2                   |     |     | 21.1 | 20.2 |
| 1421009_at   | radical S-adenosyl methionine domain containing 2                 | Rsad2                  |     |     | 27.7 | 19.0 |
| 1438855_x_at | tumor necrosis factor, alpha-induced protein 2                    | Tnfaip2                |     |     |      | 17.6 |
| 1448591_at   | cathepsin S                                                       | Ctss                   |     |     | 10.6 | 17.6 |
| 1420394_s_at | glycoprotein 49 A                                                 | Gp49a /// Lilrb4       |     |     | 20.4 | 16.1 |
| 1421578_at   | chemokine (C-C motif) ligand 4                                    | Ccl4                   |     |     | 22.1 | 13.6 |
| 1416111_at   | CD83 antigen                                                      | Cd83                   |     |     |      | 13.3 |
| 1448748_at   | pleckstrin                                                        | Plek                   |     |     | 22.6 | 13.1 |
| 1449984_at   | chemokine (C-X-C motif) ligand 2                                  | Cxcl2                  |     |     | 2.8  | 11.8 |
| 1419282_at   | chemokine (C-C motif) ligand 12                                   | Ccl12 /// LOC100048556 |     |     | 22.7 | 11.7 |
| 1436058_at   | radical S-adenosyl methionine domain containing 2                 | Rsad2                  |     |     | 6.8  | 11.5 |
| 1421551_s_at | interferon activated gene 202B                                    | Ifi202b                |     |     | 3.4  | 11.4 |
| 1452231_x_at | interferon activated gene 203                                     | Ifi203                 |     |     | 7.1  | 10.1 |
| 1449145_a_at | caveolin, caveolae protein 1                                      | Cav1                   |     |     |      | 9.3  |
| 1448929_at   | coagulation factor XIII, A1 subunit                               | F13a1                  |     |     | 11.7 | 9.0  |
| 1426906_at   | interferon activated gene 203                                     | Ifi203                 |     |     | 6.2  | 8.7  |
| 1423381_at   | RIKEN cDNA 4921521F21 gene                                        | 4921521F21Rik          |     |     |      | 8.4  |

| Probeset ID  | Gene Title                                                    | Gene Symbol                     | 8mo | 60d | 21d  | 6d  |
|--------------|---------------------------------------------------------------|---------------------------------|-----|-----|------|-----|
| 1448749_at   | pleckstrin                                                    | Plek                            |     |     | 18.1 | 7.9 |
| 1448804_at   | cytochrome P450, family 11, subfamily a, polypeptide 1        | Cyp11a1                         |     |     |      | 7.8 |
| 1419004_s_at | B-cell leukemia/lymphoma 2 related protein A1a, b, d          | Bcl2a1a /// Bcl2a1b /// Bcl2a1d |     |     | 2.0  | 6.9 |
| 1419598_at   | membrane-spanning 4-domains, subfamily A, member 6D           | Ms4a6d                          |     |     | 17.4 | 6.7 |
| 1456084_x_at | fibromodulin                                                  | Fmod                            |     |     |      | 6.1 |
| 1419873_s_at | colony stimulating factor 1 receptor                          | Csf1r                           |     |     | 4.9  | 6.1 |
| 1427076_at   | macrophage expressed gene 1                                   | Mpeg1                           |     |     |      | 6.1 |
| 1419132_at   | toll-like receptor 2                                          | Tlr2                            |     |     |      | 5.8 |
| 1452349_x_at | interferon activated gene 205                                 | Ifi205 /// Mnda                 |     |     | 8.3  | 5.6 |
| 1418293_at   | interferon-induced protein with tetratricopeptide repeats 2   | Ifit2                           |     |     | 19.7 | 5.4 |
| 1420804_s_at | C-type lectin domain family 4, member d                       | Clec4d                          |     |     | 29.2 | 5.4 |
| 1419603_at   | interferon activated gene 204                                 | Ifi204                          |     |     | 10.6 | 5.3 |
| 1423754_at   | interferon induced transmembrane protein 3                    | Ifitm3                          |     |     | 2.4  | 5.3 |
| 1451905_a_at | myxovirus (influenza virus) resistance 1                      | Mx1                             |     |     | 26.4 | 5.2 |
| 1450792_at   | TYRO protein tyrosine kinase binding protein                  | Tyrobp                          |     |     | 7.4  | 5.1 |
| 1421228_at   | chemokine (C-C motif) ligand 7                                | Ccl7                            |     |     | 5.6  | 5.1 |
| 1426808_at   | lectin, galactose binding, soluble 3                          | Lgals3                          |     |     |      | 5.0 |
| 1439902_at   | complement component 5a receptor 1                            | C5ar1                           |     |     | 17.9 | 5.0 |
| 1449399_a_at | interleukin 1 beta                                            | Il1b                            |     |     | 12.2 | 4.9 |
| 1423110_at   | collagen, type I, alpha 2                                     | Col1a2                          |     |     |      | 4.9 |
| 1420380_at   | chemokine (C-C motif) ligand 2                                | Ccl2                            |     |     | 3.0  | 4.8 |
| 1419589_at   | CD93 antigen                                                  | Cd93                            |     |     | 2.6  | 4.7 |
| 1415897_a_at | microsomal glutathione S-transferase 1                        | Mgst1                           |     |     |      | 4.5 |
| 1415906_at   | thymosin, beta 4, X chromosome                                | Tmsb4x                          |     |     |      | 4.2 |
| 1448617_at   | CD53 antigen                                                  | Cd53                            |     |     | 16.0 | 4.2 |
| 1416953_at   | connective tissue growth factor                               | Ctgf                            |     |     |      | 4.2 |
| 1427040_at   | MyoD family inhibitor domain containing                       | Mdfic                           |     |     |      | 4.2 |
| 1437569_at   | transmembrane protein 132E                                    | Tmem132e                        |     |     |      | 4.2 |
| 1424754_at   | membrane-spanning 4-domains, subfamily A, member 7            | Ms4a7                           |     | 2.5 | 12.9 | 4.1 |
| 1417492_at   | cathepsin B                                                   | Ctsb                            |     |     |      | 4.1 |
| 1415904_at   | lipoprotein lipase                                            | Lpl                             |     |     |      | 4.0 |
| 1432466_a_at | apolipoprotein E                                              | ApoE                            |     |     | 7.5  | 4.0 |
| 1441845_at   | calcyphosphine 2                                              | Caps2                           |     |     |      | 3.9 |
| 1423584_at   | insulin-like growth factor binding protein 7                  | Igfbp7                          |     |     |      | 3.9 |
| 1426348_at   | collagen, type IV, alpha 1                                    | Col4a1                          |     |     |      | 3.8 |
| 1454849_x_at | clusterin                                                     | Clu                             |     |     |      | 3.8 |
| 1426955_at   | collagen, type XVIII, alpha 1                                 | Col18a1                         |     |     |      | 3.8 |
| 1454677_at   | tissue inhibitor of metalloproteinase 2                       | Timp2                           |     |     |      | 3.8 |
| 1436346_at   | CD109 antigen                                                 | Cd109                           |     |     | 5.4  | 3.8 |
| 1416529_at   | epithelial membrane protein 1                                 | Emp1                            |     |     |      | 3.8 |
| 1424051_at   | collagen, type IV, alpha 2                                    | Col4a2                          |     |     |      | 3.7 |
| 1451860_a_at | tripartite motif-containing 30                                | Trim30                          |     |     | 6.5  | 3.7 |
| 1452346_at   | UDP-GlcNAc:betaGal beta-1,3-N-acetylglucosaminyltransferase 1 | B3gnt1                          |     |     | 3.6  | 3.7 |
| 1425528_at   | paired related homeobox 1                                     | Prrx1                           |     |     |      | 3.6 |
| 1423635_at   | bone morphogenetic protein 2                                  | Bmp2                            |     |     |      | 3.6 |
| 1450857_a_at | collagen, type I, alpha 2                                     | Col1a2                          |     |     |      | 3.6 |

| Probeset ID  | Gene Title                                          | Gene Symbol                 | 8mo | 60d | 21d  | 6d  |
|--------------|-----------------------------------------------------|-----------------------------|-----|-----|------|-----|
| 1447845_s_at | vanin 1                                             | Vnn1                        |     |     |      | 3.5 |
| 1434141_at   | guanylate cyclase 1, soluble, alpha 3               | Gucy1a3                     |     |     |      | 3.5 |
| 1418930_at   | chemokine (C-X-C motif) ligand 10                   | Cxcl10 /// LOC100045000     |     |     | 7.0  | 3.5 |
| 1416468_at   | aldehyde dehydrogenase family 1, subfamily A1       | Aldh1a1                     |     |     |      | 3.5 |
| 1434195_at   | protease, serine, 35                                | Prss35                      |     |     |      | 3.5 |
| 1433950_at   | immunoglobulin superfamily, member 21               | Igsf21                      |     |     | 3.8  | 3.5 |
| 1422458_at   | T-cell lymphoma breakpoint 1                        | Tcl1                        |     |     | 14.5 | 3.5 |
| 1426947_x_at | collagen, type VI, alpha 2                          | Col6a2                      |     |     |      | 3.5 |
| 1423770_at   | transmembrane channel-like gene family 6            | Tmc6                        |     |     |      | 3.5 |
| 1423909_at   | transmembrane protein 176A                          | Tmem176a                    |     |     |      | 3.5 |
| 1418626_a_at | clusterin                                           | Clu                         |     |     |      | 3.4 |
| 1431110_at   | plexin domain containing 2                          | Plxdc2                      |     |     |      | 3.4 |
| 1417426_at   | serglycin                                           | Srgn                        |     |     | 4.6  | 3.4 |
| 1426276_at   | interferon induced with helicase C domain 1         | Ifih1                       |     |     |      | 3.4 |
| 1437458_x_at | clusterin                                           | Clu                         |     |     |      | 3.4 |
| 1422943_a_at | heat shock protein 1                                | Hspb1                       |     |     |      | 3.4 |
| 1427884_at   | collagen, type III, alpha 1                         | Col3a1                      |     |     |      | 3.4 |
| 1417023_a_at | fatty acid binding protein 4, adipocyte             | Fabp4                       |     |     |      | 3.4 |
| 1455258_at   | potassium voltage gated channel, member 2           | Kcnc2                       |     |     | 5.6  | 3.3 |
| 1418606_at   | homeo box D10                                       | Hoxd10                      |     |     | 4.1  | 3.3 |
| 1437992_x_at | gap junction protein, alpha 1                       | Gja1                        |     |     |      | 3.3 |
| 1426640_s_at | tribbles homolog 2 (Drosophila)                     | Trib2                       |     |     |      | 3.3 |
| 1416617_at   | acyl-CoA synthetase short-chain family member 1     | Acss1                       |     |     | 3.4  | 3.3 |
| 1454862_at   | pleckstrin homology-like domain, family B, member 2 | Phldb2                      |     |     |      | 3.2 |
| 1417027_at   | tripartite motif-containing 2                       | Trim2                       |     |     |      | 3.2 |
| 1430125_s_at | PQ loop repeat containing 1                         | Pqlc1                       |     |     |      | 3.2 |
| 1437689_x_at | clusterin                                           | Clu                         |     |     |      | 3.2 |
| 1436097_x_at | Rho GTPase activating protein 9                     | Arhgap9                     |     |     |      | 3.2 |
| 1418237_s_at | collagen, type XVIII, alpha 1                       | Col18a1                     |     |     |      | 3.2 |
| 1421671_at   | hydroxysteroid (17-beta) dehydrogenase 3            | Hsd17b3                     |     |     |      | 3.2 |
| 1448169_at   | keratin 18                                          | Krt18                       |     |     |      | 3.2 |
| 1427883_a_at | collagen, type III, alpha 1                         | Col3a1                      |     |     |      | 3.2 |
| 1445328_at   | collagen, type IV, alpha 4                          | Col4a4                      |     |     | 2.6  | 3.2 |
| 1417273_at   | pyruvate dehydrogenase kinase, isoenzyme 4          | Pdk4                        |     |     | 3.1  | 3.2 |
| 1448590_at   | collagen, type VI, alpha 1                          | Col6a1                      |     |     |      | 3.2 |
| 1438945_x_at | gap junction protein, alpha 1                       | Gja1                        |     |     |      | 3.1 |
| 1453217_at   | RIKEN cDNA 4930527E24 gene                          | 4930527E24Rik /// LOC666096 |     |     |      | 3.1 |
| 1415949_at   | carboxypeptidase E                                  | Cpe /// LOC100046434        |     |     |      | 3.1 |
| 1448323_a_at | biglycan                                            | Bgn                         |     |     |      | 3.1 |
| 1431375_s_at | parvin, alpha                                       | Parva                       |     |     |      | 3.1 |
| 1418726_a_at | troponin T2, cardiac                                | Tnnt2                       |     |     | 2.8  | 3.1 |
| 1455188_at   | Eph receptor B1                                     | Ephb1                       |     |     |      | 3.1 |
| 1424769_s_at | caldesmon 1                                         | Cald1                       |     |     |      | 3.1 |
| 1419738_a_at | tropomyosin 2, beta                                 | Tpm2                        |     |     |      | 3.1 |
| 1418912_at   | plexin domain containing 2                          | Plxdc2                      |     |     |      | 3.1 |
| 1448162_at   | vascular cell adhesion molecule 1                   | Vcam1                       |     |     |      | 3.1 |

| Probeset ID  | Gene Title                                                         | Gene Symbol            | 8mo | 60d | 21d  | 6d  |
|--------------|--------------------------------------------------------------------|------------------------|-----|-----|------|-----|
| 1429189_at   | arylsulfatase B                                                    | Arsb                   |     |     |      | 3.1 |
| 1417801_a_at | protein tyrosine phosphatase, receptor-type, F interacting protein | Ppfbp2                 |     |     |      | 3.1 |
| 1454764_s_at | solute carrier family 38, member 1                                 | Slc38a1                |     |     |      | 3.1 |
| 1415973_at   | myristoylated alanine rich protein kinase C substrate              | Marcks                 |     |     |      | 3.1 |
| 1415800_at   | gap junction protein, alpha 1                                      | Gja1                   |     |     |      | 3.1 |
| 1420630_at   | RIKEN cDNA 8430419L09 gene                                         | 8430419L09Rik          |     |     |      | 3.0 |
| 1418341_at   | RAB4A, member RAS oncogene family                                  | Rab4a                  |     |     |      | 3.0 |
| 1442434_at   | DNA segment, Chr 8, ERATO Doi 82, expressed                        | D8Erttd82e             |     |     |      | 3.0 |
| 1434842_s_at | UPF3 regulator of nonsense transcripts homolog B (yeast)           | Upf3b                  |     |     | 2.3  | 3.0 |
| 1419483_at   | complement component 3a receptor 1                                 | C3ar1                  |     |     | 21.2 | 3.0 |
| 1454658_at   | ilvB (bacterial acetolactate synthase)-like                        | Ilvb1                  |     |     |      | 3.0 |
| 1438650_x_at | gap junction protein, alpha 1                                      | Gja1                   |     |     |      | 3.0 |
| 1415983_at   | lymphocyte cytosolic protein 1                                     | Lcp1                   |     |     |      | 3.0 |
| 1440250_at   | collagen, type IV, alpha 4                                         | Col4a4                 |     |     | 4.3  | 3.0 |
| 1427674_a_at | seizure related gene 6                                             | Sez6                   |     |     |      | 3.0 |
| 1437889_x_at | biglycan                                                           | Bgn                    |     |     |      | 3.0 |
| 1454704_at   | scavenger receptor class B, member 2                               | Scarb2                 |     |     |      | 3.0 |
| 1438933_x_at | RAS, guanyl releasing protein 2                                    | Rasgrp2                |     |     | 4.7  | 3.0 |
| 1417343_at   | FXFD domain-containing ion transport regulator 6                   | Fxyd6                  |     |     |      | 2.9 |
| 1424010_at   | microfibrillar-associated protein 4                                | Mfap4                  |     |     |      | 2.9 |
| 1422573_at   | AMP deaminase 3                                                    | Ampd3                  |     |     |      | 2.9 |
| 1450757_at   | cadherin 11                                                        | Cdh11                  |     |     |      | 2.9 |
| 1416405_at   | biglycan                                                           | Bgn                    |     |     |      | 2.9 |
| 1448194_a_at | H19 fetal liver mRNA                                               | H19                    |     |     | 2.8  | 2.9 |
| 1448263_a_at | CNDP dipeptidase 2 (metallopeptidase M20 family)                   | Cndp2                  |     |     |      | 2.9 |
| 1448416_at   | matrix Gla protein                                                 | Mgp                    |     |     |      | 2.9 |
| 1449816_at   | sulfotransferase family 5A, member 1                               | Sult5a1                |     |     |      | 2.9 |
| 1438973_x_at | gap junction protein, alpha 1                                      | Gja1                   |     |     |      | 2.8 |
| 1416411_at   | glutathione S-transferase, mu 2                                    | Gstm2                  |     |     |      | 2.8 |
| 1426246_at   | protein S (alpha)                                                  | Pros1                  |     |     |      | 2.8 |
| 1415948_at   | cellular repressor of E1A-stimulated genes 1                       | Creg1                  |     |     |      | 2.8 |
| 1421998_at   | torsin family 3, member A /// similar to ADIR1                     | LOC100047963 /// Tor3a |     |     |      | 2.8 |
| 1450905_at   | plexin C1                                                          | Plxnc1                 |     |     |      | 2.8 |
| 1416454_s_at | actin, alpha 2, smooth muscle, aorta                               | Acta2                  |     |     |      | 2.8 |
| 1452141_a_at | selenoprotein P, plasma, 1                                         | Sepp1                  |     |     | 7.3  | 2.8 |
| 1435026_at   | sparc/osteonectin, cwcv and kazal-like domains proteoglycan 2      | Spock2                 |     |     |      | 2.8 |
| 1448755_at   | collagen, type XV, alpha 1                                         | Col15a1                |     |     |      | 2.8 |
| 1422804_at   | serine (or cysteine) peptidase inhibitor, clade B, member 6b       | Serpnb6b               |     |     |      | 2.8 |
| 1455591_at   | zinc fingerprotein 618                                             | Zfp618                 |     |     | 3.3  | 2.8 |
| 1435176_a_at | inhibitor of DNA binding 2                                         | Id2                    |     |     | 3.1  | 2.8 |
| 1417141_at   | interferon gamma induced GTPase                                    | Igtp                   |     |     | 3.4  | 2.8 |
| 1423477_at   | zinc finger protein of the cerebellum 1 /// similar to Zic protein | LOC100044533 /// Zic1  |     |     | 10.4 | 2.8 |
| 1449318_at   | tubulin, gamma 2 /// similar to Tubulin, gamma 2                   | LOC100045019 /// Tubg2 |     |     | 2.2  | 2.8 |
| 1422437_at   | collagen, type V, alpha 2                                          | Col5a2                 |     |     |      | 2.8 |
| 1439364_a_at | matrix metallopeptidase 2                                          | Mmp2                   |     |     |      | 2.8 |
| 1434779_at   | cerebellin 2 precursor protein                                     | Cbln2                  |     |     | 10.1 | 2.8 |

| Probeset ID  | Gene Title                                                  | Gene Symbol   | 8mo | 60d | 21d | 6d  |
|--------------|-------------------------------------------------------------|---------------|-----|-----|-----|-----|
| 1429089_s_at | RIKEN cDNA 2900026A02 gene                                  | 2900026A02Rik |     |     | 6.6 | 2.8 |
| 1456250_x_at | transforming growth factor, beta induced                    | Tgfb1         |     |     |     | 2.7 |
| 1417143_at   | lysophosphatidic acid receptor 1                            | Lpar1         |     |     |     | 2.7 |
| 1450428_at   | LIM homeobox protein 1                                      | Lhx1          |     |     | 7.1 | 2.7 |
| 1423986_a_at | shisa homolog 5 ( <i>Xenopus laevis</i> )                   | Shisa5        |     |     | 2.7 | 2.7 |
| 1417262_at   | prostaglandin-endoperoxide synthase 2                       | Ptgs2         |     |     | 2.6 | 2.7 |
| 1423555_a_at | interferon-induced protein 44                               | Ifi44         |     |     | 4.0 | 2.7 |
| 1452014_a_at | insulin-like growth factor 1                                | Igf1          |     |     |     | 2.7 |
| 1450165_at   | schlafen 2                                                  | Slfm2         |     |     | 6.2 | 2.7 |
| 1417162_at   | transmembrane BAX inhibitor motif containing 1              | Tmbim1        |     |     |     | 2.7 |
| 1435349_at   | neuropilin 2                                                | Nrp2          |     |     | 3.5 | 2.7 |
| 1424599_at   | fibrinogen-like protein 1                                   | Fgl1          |     |     | 6.0 | 2.7 |
| 1450872_s_at | lysosomal acid lipase A                                     | Lipa          |     |     | 3.3 | 2.6 |
| 1455164_at   | Cdc42 GTPase-activating protein                             | Cdgap         |     |     |     | 2.6 |
| 1423104_at   | insulin receptor substrate 1                                | Irs1          |     |     |     | 2.6 |
| 1456292_a_at | vimentin                                                    | Vim           |     |     |     | 2.6 |
| 1449201_at   | steroidogenic acute regulatory protein                      | Star          |     |     |     | 2.6 |
| 1448259_at   | folliculin-like 1                                           | Fstl1         |     |     |     | 2.6 |
| 1416298_at   | matrix metalloproteinase 9                                  | Mmp9          |     |     |     | 2.6 |
| 1437555_at   | BarH-like 2 ( <i>Drosophila</i> )                           | Barhl2        |     |     | 6.2 | 2.5 |
| 1417111_at   | mannosidase 1, alpha                                        | Man1a         |     |     |     | 2.5 |
| 1448816_at   | prostaglandin I2 (prostacyclin) synthase                    | Ptgis         |     |     |     | 2.5 |
| 1426397_at   | transforming growth factor, beta receptor II                | Tgfb2         |     |     |     | 2.5 |
| 1416401_at   | CD82 antigen                                                | Cd82          |     |     | 2.0 | 2.5 |
| 1452840_at   | RIKEN cDNA 1500009L16 gene                                  | 1500009L16Rik |     |     | 4.2 | 2.5 |
| 1424249_a_at | Rho GTPase activating protein 9                             | Arhgap9       |     |     |     | 2.5 |
| 1453159_at   | EF-hand domain (C-terminal) containing 1                    | Efhc1         |     |     |     | 2.5 |
| 1456733_x_at | serine (or cysteine) peptidase inhibitor, clade H, member 1 | Serpinh1      |     |     |     | 2.5 |
| 1422618_x_at | predicted gene, ENSMUSG00000073257                          | EG546272      |     |     |     | 2.5 |
| 1426864_a_at | neural cell adhesion molecule 1                             | Ncam1         |     |     |     | 2.5 |
| 1435203_at   | mannosidase 2, alpha 2                                      | Man2a2        |     |     |     | 2.5 |
| 1450625_at   | collagen, type V, alpha 2                                   | Col5a2        |     |     |     | 2.5 |
| 1429688_at   | aryl hydrocarbon receptor nuclear translocator-like 2       | Arntl2        |     |     |     | 2.4 |
| 1436359_at   | ret proto-oncogene                                          | Ret           |     |     | 6.1 | 2.4 |
| 1420453_at   | crystallin, gamma S                                         | Crygs         |     |     | 3.6 | 2.4 |
| 1450641_at   | vimentin                                                    | Vim           |     |     |     | 2.4 |
| 1460363_at   | trinucleotide repeat containing 6C                          | Tnrc6c        |     |     |     | 2.4 |
| 1423478_at   | protein kinase C, beta 1                                    | Prkcb1        |     |     |     | 2.4 |
| 1435718_at   | adaptor-related protein complex 3, sigma 2 subunit          | Ap3s2         |     |     |     | 2.4 |
| 1425811_a_at | cysteine and glycine-rich protein 1                         | Csrp1         |     |     |     | 2.4 |
| 1435066_at   | phosphatidylinositol transfer protein, cytoplasmic 1        | Pitpnc1       |     |     | 2.3 | 2.4 |
| 1460177_at   | CNDP dipeptidase 2 (metalloproteinase M20 family)           | Cndp2         |     |     |     | 2.4 |
| 1452309_at   | cingulin-like 1                                             | Cgnl1         |     |     |     | 2.4 |
| 1435264_at   | elastin microfibril interfacier 2                           | Emilin2       |     |     | 2.3 | 2.4 |
| 1448946_at   | kinesin family member 3C                                    | Kif3c         |     |     |     | 2.4 |
| 1438118_x_at | vimentin                                                    | Vim           |     |     |     | 2.4 |

| Probeset ID  | Gene Title                                                                   | Gene Symbol            | 8mo | 60d | 21d | 6d  |
|--------------|------------------------------------------------------------------------------|------------------------|-----|-----|-----|-----|
| 1434528_at   | alanine and arginine rich domain containing protein                          | Aard                   |     |     |     | 2.4 |
| 1437614_x_at | zinc finger, DHHC domain containing 14                                       | Zdhhc14                |     |     | 2.9 | 2.4 |
| 1434642_at   | hydroxysteroid (17-beta) dehydrogenase 11                                    | Hsd17b11               |     |     |     | 2.3 |
| 1417928_at   | PDZ and LIM domain 4                                                         | Pdlim4                 |     |     |     | 2.3 |
| 1450839_at   | DNA segment, human D4S114                                                    | D0H4S114               |     |     |     | 2.3 |
| 1455235_x_at | lactate dehydrogenase B                                                      | Ldhb                   |     |     |     | 2.3 |
| 1417404_at   | ELOVL family member 6, elongation of long chain fatty acids (yeast)          | Elov16                 |     | 3.1 |     | 2.3 |
| 1416236_a_at | myelin protein zero-like 2                                                   | Mpzl2                  |     |     |     | 2.3 |
| 1422529_s_at | calsequestrin 2                                                              | Casq2                  |     |     |     | 2.3 |
| 1451911_a_at | angiotensin I converting enzyme (peptidyl-dipeptidase A) 1                   | Ace                    |     |     |     | 2.3 |
| 1447602_x_at | sulfatase 2                                                                  | Sulf2                  |     |     |     | 2.3 |
| 1438133_a_at | cysteine rich protein 61                                                     | Cyr61                  |     |     |     | 2.3 |
| 1454726_s_at | protein tyrosine phosphatase domain containing 1                             | Ptpdc1                 |     |     |     | 2.3 |
| 1456379_x_at | delta/notch-like EGF-related receptor                                        | Dner                   |     |     | 4.5 | 2.3 |
| 1435010_at   | ankyrin repeat and SOCS box-containing protein 7                             | Asb7                   |     |     |     | 2.3 |
| 1434089_at   | synaptopodin                                                                 | Synpo                  |     |     |     | 2.3 |
| 1427306_at   | ryanodine receptor 1, skeletal muscle                                        | Ryr1                   |     |     |     | 2.3 |
| 1433979_at   | RNA binding motif, single stranded interacting protein 2                     | Rbms2                  |     | 2.8 |     | 2.3 |
| 1451161_a_at | EGF-like module containing, hormone receptor-like sequence 1                 | Emr1                   |     | 6.1 |     | 2.3 |
| 1428910_at   | RIKEN cDNA 2310022B05 gene                                                   | 2310022B05Rik          |     |     |     | 2.3 |
| 1428547_at   | 5' nucleotidase, ecto                                                        | Nt5e                   |     |     |     | 2.3 |
| 1452304_a_at | Rho guanine nucleotide exchange factor (GEF) 5                               | Arhgef5                |     |     |     | 2.3 |
| 1454824_s_at | mitochondrial tumor suppressor 1                                             | Mtms1                  |     | 2.3 |     | 2.3 |
| 1455308_at   | transmembrane protein 16F                                                    | Tmem16f                |     |     |     | 2.3 |
| 1451446_at   | anthrax toxin receptor 1                                                     | Antxr1                 |     |     |     | 2.3 |
| 1423428_at   | receptor tyrosine kinase-like orphan receptor 2                              | Ror2                   |     |     |     | 2.3 |
| 1452114_s_at | insulin-like growth factor binding protein 5                                 | Igfbp5                 |     |     |     | 2.3 |
| 1416441_at   | plasma glutamate carboxypeptidase                                            | Pgcp                   |     |     |     | 2.3 |
| 1452269_at   | spectrin beta 3                                                              | Spnb3                  |     | 3.6 |     | 2.2 |
| 1455531_at   | major facilitator superfamily domain containing 4                            | Mfsd4                  |     |     |     | 2.2 |
| 1460244_at   | ureidopropionase, beta                                                       | Upb1                   |     |     |     | 2.2 |
| 1418753_at   | glutamine fructose-6-phosphate transaminase 2                                | Gfpt2                  |     |     |     | 2.2 |
| 1450627_at   | progressive ankylosis                                                        | Ank                    |     | 3.3 |     | 2.2 |
| 1434111_at   | similar to calcium-independent alpha-latrotoxin receptor homol               | LOC100048050 /// Lphn2 |     |     |     | 2.2 |
| 1441945_s_at | abhydrolase domain containing 14A                                            | Abhd14a                |     |     |     | 2.2 |
| 1429032_at   | MICAL C-terminal like                                                        | Micalcl                |     |     | 2.3 | 2.2 |
| 1438975_x_at | zinc finger, DHHC domain containing 14                                       | Zdhhc14                |     |     | 3.0 | 2.2 |
| 1423668_at   | zinc finger, DHHC domain containing 14                                       | Zdhhc14                |     |     | 2.3 | 2.2 |
| 1451298_at   | pleckstrin homology domain containing, family H (with MyTH4 domain) member 3 | Plekhh3                |     |     |     | 2.2 |
| 1434992_at   | RIKEN cDNA 9130206N08 gene                                                   | 9130206N08Rik          |     |     |     | 2.2 |
| 1448944_at   | neuropilin 1                                                                 | Nrp1                   |     |     |     | 2.2 |
| 1450852_s_at | coagulation factor II (thrombin) receptor                                    | F2r                    |     | 3.0 |     | 2.2 |
| 1454966_at   | integrin alpha 8                                                             | Itga8                  |     |     |     | 2.2 |
| 1448241_at   | GM2 ganglioside activator protein                                            | Gm2a                   |     |     |     | 2.2 |
| 1415961_at   | integral membrane protein 2C                                                 | Itm2c                  |     |     |     | 2.2 |
| 1448696_at   | hephaestin                                                                   | Heph                   |     |     |     | 2.2 |

| Probeset ID  | Gene Title                                                     | Gene Symbol               | 8mo | 60d | 21d  | 6d  |
|--------------|----------------------------------------------------------------|---------------------------|-----|-----|------|-----|
| 1424368_s_at | ubiquilin 1                                                    | Ubqln1                    |     |     |      | 2.2 |
| 1456046_at   | CD93 antigen                                                   | Cd93                      |     |     |      | 2.2 |
| 1438151_x_at | zinc finger, DHHC domain containing 14                         | Zdhhc14                   |     |     |      | 2.2 |
| 1449404_at   | phosphatidylinositol-5-phosphate 4-kinase, type II, alpha      | Pip4k2a                   |     |     | 2.1  | 2.2 |
| 1416808_at   | nidogen 1                                                      | Nid1                      |     |     | 3.4  | 2.2 |
| 1416918_at   | discs, large homolog 3 (Drosophila)                            | Dlg3                      |     |     |      | 2.2 |
| 1438116_x_at | solute carrier family 9                                        | Slc9a3r1                  |     |     |      | 2.2 |
| 1429842_at   | malate dehydrogenase 1B, NAD (soluble)                         | Mdh1b                     |     |     |      | 2.2 |
| 1419938_s_at | Rho guanine nucleotide exchange factor (GEF) 17                | Arhgef17                  |     |     |      | 2.1 |
| 1442865_at   | diacylglycerol kinase kappa                                    | Dgkk                      |     |     | 6.2  | 2.1 |
| 1419582_at   | cytochrome P450, family 2, subfamily c, polypeptide 55         | Cyp2c55                   |     |     |      | 2.1 |
| 1455429_at   | expressed sequence AI450540                                    | AI450540                  |     |     |      | 2.1 |
| 1431591_s_at | ISG15 ubiquitin-like modifier                                  | Isg15 /// LOC100038882    |     |     | 4.5  | 2.1 |
| 1437308_s_at | coagulation factor II (thrombin) receptor                      | F2r                       |     |     | 2.6  | 2.1 |
| 1426241_a_at | sex comb on midleg homolog 1                                   | Scmh1                     |     |     |      | 2.1 |
| 1429052_at   | protein tyrosine phosphatase, receptor type, D                 | Ptprd                     |     |     |      | 2.1 |
| 1437339_s_at | proprotein convertase subtilisin/kexin type 5                  | Pcsk5                     |     |     |      | 2.1 |
| 1450475_at   | distal-less homeobox 3                                         | Dlx3                      |     |     | 3.4  | 2.1 |
| 1424339_at   | 2'-5' oligoadenylate synthetase-like 1                         | Oasl1                     |     |     | 12.5 | 2.1 |
| 1436501_at   | mitochondrial tumor suppressor 1                               | Mtus1                     |     |     |      | 2.1 |
| 1418046_at   | nucleosome assembly protein 1-like 2                           | Nap1l2                    |     |     |      | 2.1 |
| 1422617_at   | predicted gene, ENSMUSG00000073257                             | EG546272 /// LOC100039003 |     |     |      | 2.1 |
| 1456642_x_at | S100 calcium binding protein A10 (calpactin)                   | S100a10                   |     |     |      | 2.1 |
| 1427168_a_at | collagen, type XIV, alpha 1                                    | Col14a1                   |     |     |      | 2.1 |
| 1456133_x_at | integrin beta 5                                                | Itgb5                     |     |     |      | 2.1 |
| 1437671_x_at | protease, serine, 23                                           | Prss23                    |     |     |      | 2.1 |
| 1455215_at   | RIKEN cDNA C530028O21 gene                                     | C530028O21Rik             |     |     |      | 2.1 |
| 1434112_at   | similar to calcium-independent alpha-latrotoxin receptor homol | LOC100048050 /// Lphn2    |     |     |      | 2.1 |
| 1451592_at   | Myb protein P42POP                                             | P42pop                    |     |     |      | 2.1 |
| 1460419_a_at | protein kinase C, beta 1                                       | Prkcb1                    |     | 2.5 |      | 2.1 |
| 1439152_at   | methenyltetrahydrofolate synthetase domain containing          | Mthfsd                    |     |     |      | 2.1 |
| 1448690_at   | potassium channel, subfamily K, member 1                       | Kcnk1                     |     |     |      | 2.1 |
| 1428340_s_at | ATPase type 13A2                                               | Atp13a2                   |     |     |      | 2.1 |
| 1455316_x_at | predicted gene, ENSMUSG00000073624                             | ENSMUSG00000073624        |     |     |      | 2.1 |
| 1415903_at   | solute carrier family 38, member 1                             | Slc38a1                   |     |     |      | 2.1 |
| 1417996_at   | neuroglobin                                                    | Ngb                       |     |     |      | 2.1 |
| 1418445_at   | solute carrier family 16                                       | Slc16a2                   |     |     |      | 2.0 |
| 1435925_at   | G protein-coupled receptor kinase-interactor 2                 | Git2                      |     |     |      | 2.0 |
| 1416165_at   | RAB31, member RAS oncogene family                              | Rab31                     |     |     |      | 2.0 |
| 1428615_at   | purinergic receptor P2Y, G-protein coupled, 5                  | P2ry5                     |     |     |      | 2.0 |
| 1451728_at   | WD repeat domain 13                                            | Wdr13                     |     |     |      | 2.0 |
| 1445710_x_at | double homeobox B-like                                         | Duxbl                     |     |     |      | 2.0 |
| 1460259_s_at | chloride channel calcium activated 1                           | Clca1 /// Clca2           |     |     |      | 2.0 |
| 1454890_at   | angiomin                                                       | Amot                      |     |     | 3.0  | 2.0 |
| 1424470_a_at | Rap guanine nucleotide exchange factor (GEF) 3                 | Rapgef3                   |     |     |      | 2.0 |
| 1415935_at   | SPARC related modular calcium binding 2                        | Smoc2                     |     |     |      | 2.0 |

| Probeset ID  | Gene Title                                                      | Gene Symbol                 | 8mo | 60d | 21d | 6d  |
|--------------|-----------------------------------------------------------------|-----------------------------|-----|-----|-----|-----|
| 1436495_s_at | zinc finger protein 260                                         | Zfp260                      |     |     |     | 2.0 |
| 1437466_at   | activated leukocyte cell adhesion molecule                      | Alcam                       |     |     |     | 2.0 |
| 1416368_at   | glutathione S-transferase, alpha 4                              | Gsta4                       |     |     |     | 2.0 |
| 1426567_a_at | PQ loop repeat containing 1                                     | Pqlc1                       |     |     |     | 2.0 |
| 1424562_a_at | solute carrier family 25                                        | Slc25a4                     |     |     |     | 2.0 |
| 1433796_at   | endonuclease domain containing 1                                | Endod1                      |     |     |     | 2.0 |
| 1455900_x_at | transglutaminase 2, C polypeptide                               | Tgm2                        |     |     |     | 2.0 |
| 1448237_x_at | lactate dehydrogenase B                                         | Ldhb                        |     |     |     | 2.0 |
| 1427659_at   | Mus musculus, clone IMAGE:4006890                               | ---                         |     | 5.1 |     |     |
| 1425398_at   | histone cluster 1, H2bc, H2bb, H2be                             | Hist1h2bb /// Hist1h2bc     |     | 3.4 |     |     |
| 1444674_at   | expressed sequence AU015680                                     | AU015680                    |     | 3.1 | 6.5 |     |
| 1416871_at   | a disintegrin and metallopeptidase domain 8                     | Adam8                       |     | 3.1 | 2.1 |     |
| 1436530_at   | predicted gene, OTTMUSG00000000971                              | OTTMUSG00000000971          |     | 3.0 | 9.0 |     |
| 1427537_at   | epiplakin 1                                                     | Eppk1                       |     | 3.0 | 2.7 |     |
| 1437777_at   | activating transcription factor 2                               | Atf2                        |     | 2.9 | 4.3 |     |
| 1441410_at   | DNA segment, Chr 2, ERATO Doi 112, expressed                    | D2Ertd112e                  |     | 2.8 | 3.9 |     |
| 1417061_at   | solute carrier family 40 (iron-regulated transporter), member 1 | Slc40a1                     |     | 2.8 | 4.1 |     |
| 1450435_at   | L1 cell adhesion molecule                                       | L1cam                       |     | 2.7 | 2.2 |     |
| 1445830_at   | catenin (cadherin associated protein), delta 1                  | Ctnnd1                      |     | 2.6 | 3.0 |     |
| 1445226_at   | cDNA sequence BC023969                                          | BC023969                    |     | 2.6 |     |     |
| 1435435_at   | cortactin binding protein 2                                     | Cttnbp2                     |     | 2.6 |     |     |
| 1457535_at   | RIKEN cDNA 4932438A13 gene                                      | 4932438A13Rik               |     | 2.6 | 7.3 |     |
| 1444418_at   | Inositol 1,4,5-triphosphate receptor 2                          | Itpr2                       |     | 2.6 |     |     |
| 1434850_at   | IQ motif containing GTPase activating protein 3                 | Iqgap3                      |     | 2.6 |     |     |
| 1435197_at   | POU domain, class 3, transcription factor 3                     | Pou3f3                      |     | 2.6 |     |     |
| 1434433_x_at | WD repeat domain 61                                             | Wdr61                       |     | 2.5 |     |     |
| 1438222_at   | DNA segment, Chr 2, ERATO Doi 612, expressed                    | D2Ertd612e                  |     | 2.5 | 5.6 |     |
| 1444320_at   | DDHD domain containing 2                                        | Ddhd2                       |     | 2.5 | 6.1 |     |
| 1436769_at   | proteasome (prosome, macropain) subunit, alpha type 1           | Psm1                        |     | 2.5 |     |     |
| 1448961_at   | phospholipid scramblase 2                                       | Plscr2                      |     | 2.5 |     |     |
| 1457174_at   | expressed sequence AU015680                                     | AU015680                    |     | 2.5 | 4.7 |     |
| 1447977_x_at | novel KRAB box and zinc finger                                  | LOC668030 /// RP23-355G16.5 |     | 2.5 |     |     |
| 1425856_at   | Calcium and integrin binding 1 (calmyrin)                       | Cib1                        |     | 2.4 |     |     |
| 1460069_at   | structural maintenance of chromosomes 6                         | Smc6                        |     | 2.4 | 4.9 |     |
| 1429934_at   | RIKEN cDNA 4930502E18 gene                                      | 4930502E18Rik               |     | 2.4 |     |     |
| 1436370_at   | guanylate cyclase 2c                                            | Gucy2c                      |     | 2.4 |     |     |
| 1447266_at   | small subunit (SSU) processome component, homolog (yeast)       | Utp18                       |     | 2.4 |     |     |
| 1459884_at   | cytochrome c oxidase, subunit VIIc                              | Cox7c /// LOC100041521      |     | 2.3 |     |     |
| 1429024_at   | RNA binding motif protein 20                                    | Rbm20                       |     | 2.3 |     |     |
| 1431556_at   | RIKEN cDNA 4930435M08 gene                                      | 4930435M08Rik               |     | 2.3 |     |     |
| 1445888_x_at | poly (ADP-ribose) polymerase family, member 3                   | Parp3                       |     | 2.3 |     |     |
| 1455087_at   | DNA segment, Chr 7, ERATO Doi 715, expressed                    | D7Ertd715e                  |     | 2.3 | 2.3 |     |
| 1454833_at   | ribosomal protein L35                                           | Rpl35                       |     | 2.2 | 2.1 |     |
| 1443396_at   | survival motor neuron domain containing 1                       | LOC545792 /// Smndc1        |     | 2.2 | 4.8 |     |
| 1439847_s_at | Kruppel-like factor 12                                          | Klf12                       |     | 2.2 |     |     |
| 1428784_at   | Gem-interacting protein                                         | Gmip                        |     | 2.2 |     |     |

| Probeset ID  | Gene Title                                                          | Gene Symbol            | 8mo | 60d | 21d | 6d |
|--------------|---------------------------------------------------------------------|------------------------|-----|-----|-----|----|
| 1436119_at   | aldehyde dehydrogenase 1 family, member L2                          | Aldh1l2                |     | 2.2 | 3.3 |    |
| 1429202_at   | RIKEN cDNA 2610019N06 gene                                          | 2610019N06Rik          |     | 2.2 |     |    |
| 1457673_at   | RIKEN cDNA 6820431F20 gene                                          | 6820431F20Rik          |     | 2.2 |     |    |
| 1441535_at   | Myeloid/lymphoid or mixed-lineage leukemia (trithorax , Drosophila) | Mllt3                  |     | 2.2 |     |    |
| 1415995_at   | caspase 6                                                           | Casp6                  |     | 2.2 |     |    |
| 1453661_at   | RIKEN cDNA 9130403I23 gene                                          | 9130403I23Rik          |     | 2.2 |     |    |
| 1439126_at   | RIKEN cDNA 1110007A13 gene                                          | 1110007A13Rik          |     | 2.2 | 3.9 |    |
| 1447901_x_at | Sfi1 homolog, spindle assembly associated (yeast)                   | Sfi1                   |     | 2.1 |     |    |
| 1427681_s_at | vomeronasal 2, receptor 88                                          | Vmn2r88                |     | 2.1 |     |    |
| 1418548_at   | seminal vesicle secretory protein 6                                 | Svs6                   |     | 2.1 |     |    |
| 1453431_at   | RIKEN cDNA 2610206C17 gene                                          | 2610206C17Rik          |     | 2.1 |     |    |
| 1440048_at   | SWI/SNF related, regulator of chromatin                             | Smarca5                |     | 2.1 | 4.1 |    |
| 1431434_at   | serine/threonine kinase 39, STE20/SPS1 homolog (yeast)              | Stk39                  |     | 2.0 | 9.0 |    |
| 1427193_at   | bromodomain containing 8                                            | Brd8                   |     | 2.0 | 2.4 |    |
| 1447946_at   | a disintegrin and metallopeptidase domain 23                        | Adam23                 |     |     | 3.0 |    |
| 1435769_at   | A kinase (PRKA) anchor protein (yotiao) 9                           | Akap9                  |     |     | 2.5 |    |
| 1447913_x_at | A kinase (PRKA) anchor protein (yotiao) 9                           | Akap9                  |     |     | 2.8 |    |
| 1447912_x_at | A kinase (PRKA) anchor protein (yotiao) 9                           | Akap9                  |     |     | 3.1 |    |
| 1455151_at   | A kinase (PRKA) anchor protein (yotiao) 9                           | Akap9                  |     |     | 4.4 |    |
| 1437082_at   | A kinase (PRKA) anchor protein (yotiao) 9                           | Akap9                  |     |     | 4.5 |    |
| 1430185_at   | A kinase (PRKA) anchor protein 13                                   | Akap13                 |     |     | 6.0 |    |
| 1448490_at   | aarF domain containing kinase 4                                     | Adck4                  |     |     | 2.1 |    |
| 1458053_at   | abl-interactor 2                                                    | Abi2                   |     |     | 8.7 |    |
| 1426942_at   | absent in melanoma 1                                                | Aim1                   |     |     | 2.6 |    |
| 1427052_at   | acetyl-Coenzyme A carboxylase beta                                  | Acacb /// LOC100047358 |     |     | 2.5 |    |
| 1442295_at   | Actin related protein 2/3 complex, subunit 2                        | Arpc2                  |     |     | 3.5 |    |
| 1448279_at   | actin related protein 2/3 complex, subunit 3                        | Arpc3                  |     |     | 2.1 |    |
| 1448327_at   | actinin alpha 2                                                     | Actn2                  |     |     | 3.1 |    |
| 1433477_at   | active BCR-related gene                                             | Abr                    |     |     | 3.9 |    |
| 1450764_at   | acyloxyacyl hydrolase                                               | Aoah                   |     |     | 2.8 |    |
| 1432007_s_at | adaptor protein complex AP-2, alpha 2 subunit                       | Ap2a2                  |     |     | 3.6 |    |
| 1417527_at   | adaptor-related protein complex 3, mu 2 subunit                     | Ap3m2                  |     |     | 3.0 |    |
| 1435892_at   | additional sex combs like 3 (Drosophila)                            | Asxl3                  |     |     | 3.2 |    |
| 1435543_at   | adenomatosis polyposis coli                                         | Apc                    |     |     | 2.0 |    |
| 1434268_at   | adenosine deaminase, RNA-specific                                   | Adar                   |     |     | 2.3 |    |
| 1439276_at   | Adenosine deaminase, RNA-specific                                   | Adar                   |     |     | 3.2 |    |
| 1434722_at   | adenosine monophosphate deaminase 1 (isoform M)                     | Ampd1                  |     |     | 2.5 |    |
| 1456307_s_at | adenylate cyclase 7                                                 | Adcy7                  |     |     | 3.7 |    |
| 1450065_at   | adenylate cyclase 7                                                 | Adcy7                  |     |     | 3.9 |    |
| 1434454_at   | adenylate cyclase 9                                                 | Adcy9                  |     |     | 2.1 |    |
| 1419811_at   | adenylate cyclase 9                                                 | Adcy9                  |     |     | 2.6 |    |
| 1421830_at   | adenylate kinase 3 alpha-like 1 /// similar to adenylylate kinase 4 | Ak3l1                  |     |     | 2.6 |    |
| 1450387_s_at | adenylate kinase 3 alpha-like 1 /// similar to adenylylate kinase 4 | Ak3l1                  |     |     | 3.3 |    |
| 1448318_at   | adipose differentiation related protein                             | Adfp                   |     |     | 4.1 |    |
| 1456917_at   | ADP-ribosylation factor guanine nucleotide-exchange factor 1        | Arfgef1                |     |     | 5.2 |    |
| 1433939_at   | AF4/FMR2 family, member 3                                           | Aff3                   |     |     | 3.6 |    |

| Probeset ID  | Gene Title                                                     | Gene Symbol           | 8mo | 60d | 21d | 6d |
|--------------|----------------------------------------------------------------|-----------------------|-----|-----|-----|----|
| 1426670_at   | agrin                                                          | Agrrn                 |     |     | 2.2 |    |
| 1451461_a_at | aldolase 3, C isoform                                          | Aldoc                 |     |     | 3.9 |    |
| 1416645_a_at | alpha fetoprotein                                              | Afp                   |     |     | 3.4 |    |
| 1416646_at   | alpha fetoprotein                                              | Afp                   |     |     | 3.9 |    |
| 1420947_at   | alpha thalassemia/mental retardation syndrome X-linked homolog | Atrx                  |     |     | 2.4 |    |
| 1433537_at   | alpha thalassemia/mental retardation syndrome X-linked homolog | Atrx                  |     |     | 2.7 |    |
| 1433649_at   | amine oxidase, flavin containing 1                             | Aof1                  |     |     | 2.2 |    |
| 1434507_at   | aminopeptidase-like 1                                          | Npepl1                |     |     | 2.5 |    |
| 1444668_at   | amplified spermatogenic transcripts X encoded                  | Astx                  |     |     | 3.3 |    |
| 1417783_at   | amyotrophic lateral sclerosis 2 (juvenile) homolog (human)     | Als2                  |     |     | 2.1 |    |
| 1435880_at   | ankrin repeat domain 50                                        | Ankrd50               |     |     | 2.1 |    |
| 1443654_at   | ankyrin repeat and FYVE domain containing 1                    | Ankfy1                |     |     | 4.6 |    |
| 1456110_at   | ankyrin repeat domain 11 /// hypothetical protein LOC629623    | Ankrd11 /// LOC629623 |     |     | 2.4 |    |
| 1421220_at   | ankyrin repeat domain 17                                       | Ankrd17               |     |     | 2.8 |    |
| 1437217_at   | ankyrin repeat domain 6                                        | Ankrd6                |     |     | 2.7 |    |
| 1438764_at   | annexin A7                                                     | Anxa7                 |     |     | 2.1 |    |
| 1441141_at   | Antagonist of mitotic exit network 1 homolog (S. cerevisiae)   | Amn1                  |     |     | 4.5 |    |
| 1454670_at   | arginine glutamic acid dipeptide (RE) repeats                  | Rere                  |     |     | 2.1 |    |
| 1459958_at   | arginine/serine-rich coiled-coil 1                             | Rsrc1                 |     |     | 3.6 |    |
| 1443559_at   | Arginine/serine-rich coiled-coil 2                             | Rsrc2                 |     |     | 2.6 |    |
| 1445934_at   | ariadne homolog 2 (Drosophila)                                 | Arih2                 |     |     | 2.3 |    |
| 1415780_a_at | armadillo repeat containing, X-linked 2                        | Armxc2                |     |     | 2.4 |    |
| 1456739_x_at | armadillo repeat containing, X-linked 2                        | Armxc2                |     |     | 2.5 |    |
| 1457970_at   | ARP1 actin-related protein 1 homolog A (yeast)                 | Actr1a                |     |     | 2.4 |    |
| 1441660_at   | ARP2 actin-related protein 2 homolog (yeast)                   | Actr2                 |     |     | 2.9 |    |
| 1426239_s_at | arrestin, beta 2                                               | Arrb2                 |     |     | 2.2 |    |
| 1420985_at   | ash1 (absent, small, or homeotic)-like (Drosophila)            | Ash1l                 |     |     | 2.2 |    |
| 1452958_at   | aspartate beta-hydroxylase domain containing 2                 | Asphd2                |     |     | 3.0 |    |
| 1460579_at   | aspartyl aminopeptidase                                        | Dnpep                 |     |     | 2.3 |    |
| 1446472_at   | AT hook containing transcription factor 1                      | Ahctf1                |     |     | 3.6 |    |
| 1438816_at   | AT hook containing transcription factor 1                      | Ahctf1                |     |     | 6.3 |    |
| 1438921_at   | Ataxia telangiectasia and Rad3 related                         | Atr                   |     |     | 4.8 |    |
| 1459363_at   | Ataxin 2                                                       | Atxn2                 |     |     | 3.2 |    |
| 1436358_at   | ATP synthase mitochondrial F1 complex assembly factor 1        | Atpaf1                |     |     | 2.1 |    |
| 1438809_at   | ATP synthase, H+ transporting, mitochondrial F1 complex        | Atp5c1                |     |     | 2.0 |    |
| 1438178_x_at | ATPase family, AAA domain containing 3A                        | Atad3a                |     |     | 2.0 |    |
| 1456541_x_at | ATPase family, AAA domain containing 3A                        | Atad3a                |     |     | 2.2 |    |
| 1417475_at   | ATPase type 13A1                                               | Atp13a1               |     |     | 2.1 |    |
| 1437797_at   | ATPase, Ca++ transporting, cardiac muscle, slow twitch 2       | Atp2a2                |     |     | 7.3 |    |
| 1439215_at   | ATPase, Ca++-sequestering                                      | Atp2c1                |     |     | 4.1 |    |
| 1455396_at   | ATPase, class I, type 8B, member 1                             | Atp8b1                |     |     | 2.2 |    |
| 1434026_at   | Atpase, class I, type 8B, member 2                             | Atp8b2                |     |     | 2.2 |    |
| 1449622_s_at | ATPase, H+ transporting, lysosomal accessory protein 1         | Atp6ap1               |     |     | 2.5 |    |
| 1421840_at   | ATP-binding cassette, sub-family A (ABC1), member 1            | Abca1                 |     |     | 2.6 |    |
| 1427371_at   | ATP-binding cassette, sub-family A (ABC1), member 8a           | Abca8a                |     |     | 4.2 |    |
| 1452233_at   | ATP-binding cassette, sub-family C (CFTR/MRP), member 1        | Abcc1                 |     |     | 2.0 |    |

| Probeset ID  | Gene Title                                                      | Gene Symbol            | 8mo | 60d | 21d | 6d |
|--------------|-----------------------------------------------------------------|------------------------|-----|-----|-----|----|
| 1423570_at   | ATP-binding cassette, sub-family G (WHITE), member 1            | Abcg1                  |     |     | 3.2 |    |
| 1456060_at   | avian musculoaponeurotic fibrosarcoma (v-maf) AS42 oncogene     | Maf                    |     |     | 8.7 |    |
| 1434284_at   | B double prime 1, pol III transcription initiation factor       | Bdp1                   |     |     | 2.2 |    |
| 1442959_at   | baculoviral IAP repeat-containing 6                             | Birc6                  |     |     | 6.0 |    |
| 1424890_at   | basonuclin 1                                                    | Bnc1                   |     |     | 2.4 |    |
| 1438861_at   | basonuclin 2                                                    | Bnc2                   |     |     | 3.4 |    |
| 1418421_at   | B-cell CLL/lymphoma 6, member B                                 | Bcl6b                  |     |     | 3.8 |    |
| 1428207_at   | B-cell CLL/lymphoma 7A                                          | Bcl7a                  |     |     | 2.4 |    |
| 1451574_at   | B-cell CLL/lymphoma 9                                           | Bcl9                   |     |     | 3.8 |    |
| 1421818_at   | B-cell leukemia/lymphoma 6                                      | Bcl6                   |     |     | 2.1 |    |
| 1455771_at   | benzodiazepine receptor associated protein 1                    | Bzrap1                 |     |     | 3.5 |    |
| 1443142_at   | beta-transducin repeat containing protein                       | Btrc                   |     |     | 6.7 |    |
| 1419304_at   | brachyury                                                       |                        |     |     | 5.6 |    |
| 1442749_at   | Braf transforming gene                                          | Braf                   |     |     | 4.1 |    |
| 1430047_at   | BRCT domain containing 1                                        | Brctd1                 |     |     | 3.4 |    |
| 1452368_at   | breakpoint cluster region homolog                               | Bcr                    |     |     | 2.2 |    |
| 1438198_at   | Bri3 binding protein                                            | Bri3bp                 |     |     | 2.0 |    |
| 1434824_at   | bromodomain adjacent to zinc finger domain, 1B                  | Baz1b                  |     |     | 2.1 |    |
| 1445048_at   | bromodomain adjacent to zinc finger domain, 2B                  | Baz2b                  |     |     | 4.7 |    |
| 1424921_at   | bromodomain containing 4 /// bone marrow stromal cell antigen 2 | Brd4 /// Bst2          |     |     | 2.0 |    |
| 1427192_a_at | bromodomain containing 8                                        | Brd8                   |     |     | 2.5 |    |
| 1452350_at   | bromodomain containing 8                                        | Brd8                   |     |     | 3.0 |    |
| 1444667_at   | bromodomain, testis-specific                                    | Brdt                   |     |     | 5.1 |    |
| 1452240_at   | bruno-like 4, RNA binding protein (Drosophila)                  | Brunol4                |     |     | 2.7 |    |
| 1432910_at   | BTB (POZ) domain containing 7                                   | Btbd7                  |     |     | 7.5 |    |
| 1417393_a_at | C1q domain containing 2                                         | C1qdc2                 |     |     |     |    |
| 1433686_at   | calcineurin binding protein 1                                   | Cabin1                 |     |     | 2.7 |    |
| 1421297_a_at | calcium channel, voltage-dependent, L type, alpha 1C subunit    | Cacna1c                |     |     | 2.7 |    |
| 1438643_at   | Calcium/calmodulin-dependent protein kinase ID                  | Camk1d                 |     |     | 5.6 |    |
| 1448676_at   | calcium/calmodulin-dependent protein kinase II, beta            | Camk2b                 |     |     | 2.3 |    |
| 1439168_at   | calcium/calmodulin-dependent protein kinase II, delta           | Camk2d                 |     |     | 3.0 |    |
| 1433971_at   | calmodulin binding transcription activator 1                    | Camta1                 |     |     | 2.7 |    |
| 1417606_a_at | calreticulin                                                    | Calr                   |     |     | 2.2 |    |
| 1421861_at   | calsyntenin 1                                                   | Clstn1                 |     |     | 2.0 |    |
| 1450355_a_at | capping protein (actin filament), gelsolin-like                 | Capg                   |     |     | 4.1 |    |
| 1434316_at   | carbohydrate (chondroitin) synthase 1                           | Chsy1 /// LOC100047167 |     |     | 2.4 |    |
| 1427912_at   | carbonyl reductase 3                                            | Cbr3                   |     |     | 2.3 |    |
| 1438156_x_at | carnitine palmitoyltransferase 1a, liver                        | Cpt1a                  |     |     | 2.3 |    |
| 1434866_x_at | carnitine palmitoyltransferase 1a, liver                        | Cpt1a                  |     |     | 2.4 |    |
| 1422825_at   | CART prepropeptide                                              | Cartpt                 |     |     | 3.6 |    |
| 1439342_at   | Caseinolytic peptidase X (E.coli)                               | Clpx                   |     |     | 3.5 |    |
| 1449265_at   | caspase 1 /// hypothetical protein LOC100044207                 | Casp1 /// LOC100044207 |     |     | 7.8 |    |
| 1448659_at   | caspase 7                                                       | Casp7                  |     |     | 2.2 |    |
| 1448128_at   | cathepsin A                                                     | Ctsa                   |     |     | 2.4 |    |
| 1448732_at   | cathepsin B                                                     | Ctsb                   |     |     | 2.8 |    |
| 1443084_at   | cathepsin O                                                     | Ctso                   |     |     | 2.3 |    |

| Probeset ID  | Gene Title                                               | Gene Symbol               | 8mo | 60d | 21d  | 6d |
|--------------|----------------------------------------------------------|---------------------------|-----|-----|------|----|
| 1417869_s_at | cathepsin Z                                              | Ctsz                      |     |     | 2.1  |    |
| 1417870_x_at | cathepsin Z                                              | Ctsz                      |     |     | 2.7  |    |
| 1417868_a_at | cathepsin Z                                              | Ctsz                      |     |     | 2.7  |    |
| 1448715_x_at | CCR4 carbon catabolite repression 4-like (S. cerevisiae) | Ccrn4l /// Cog6           |     |     | 2.4  |    |
| 1421000_at   | CCR4-NOT transcription complex, subunit 4                | Cnot4                     |     |     | 2.1  |    |
| 1434311_at   | CCR4-NOT transcription complex, subunit 6-like           | Cnot6l                    |     |     | 2.0  |    |
| 1417268_at   | CD14 antigen                                             | Cd14                      |     |     | 12.7 |    |
| 1419714_at   | CD274 antigen                                            | Cd274                     |     |     | 7.6  |    |
| 1445882_at   | CD300 antigen like family member B                       | Cd300lb                   |     |     | 2.2  |    |
| 1450883_a_at | CD36 antigen                                             | Cd36                      |     |     | 10.0 |    |
| 1423166_at   | CD36 antigen                                             | Cd36                      |     |     | 13.5 |    |
| 1433741_at   | CD38 antigen                                             | Cd38                      |     |     | 2.6  |    |
| 1439221_s_at | CD40 antigen                                             | Cd40                      |     |     | 2.1  |    |
| 1460415_a_at | CD40 antigen                                             | Cd40                      |     |     | 2.6  |    |
| 1420404_at   | CD86 antigen                                             | Cd86                      |     |     | 4.4  |    |
| 1449858_at   | CD86 antigen                                             | Cd86                      |     |     | 17.1 |    |
| 1416066_at   | CD9 antigen                                              | Cd9                       |     |     | 2.1  |    |
| 1443294_at   | Cdc2-related kinase, arginine/serine-rich                | Crkrs                     |     |     | 4.7  |    |
| 1442260_at   | Cdc42 binding protein kinase alpha                       | Cdc42bpa                  |     |     | 4.8  |    |
| 1430039_at   | CDK5 regulatory subunit associated protein 1-like 1      | Cdkal1                    |     |     | 3.5  |    |
| 1447896_s_at | CDNA clone IMAGE:1196043                                 | ---                       |     |     | 2.5  |    |
| 1436798_at   | CDNA clone IMAGE:5039327                                 | ---                       |     |     | 2.1  |    |
| 1454980_at   | CDNA clone IMAGE:582204                                  | ---                       |     |     | 2.0  |    |
| 1459721_at   | CDNA clone IMAGE:6406267                                 | ---                       |     |     | 2.9  |    |
| 1424609_a_at | cDNA sequence BC003993 /// hypothetical protein          | BC003993 /// LOC100039204 |     |     | 5.7  |    |
| 1424607_a_at | cDNA sequence BC003993 /// hypothetical protein          | BC003993 /// LOC100039204 |     |     | 5.9  |    |
| 1444268_at   | cDNA sequence BC004004                                   | BC004004                  |     |     | 3.2  |    |
| 1443827_x_at | cDNA sequence BC004044                                   | BC004044                  |     |     | 2.7  |    |
| 1425108_a_at | cDNA sequence BC004728                                   | BC004728                  |     |     | 2.5  |    |
| 1451221_at   | cDNA sequence BC018507                                   | BC018507                  |     |     | 2.3  |    |
| 1424071_s_at | cDNA sequence BC018507                                   | BC018507                  |     |     | 2.5  |    |
| 1437868_at   | cDNA sequence BC023892                                   | BC023892                  |     |     | 2.5  |    |
| 1431860_at   | cDNA sequence BC026513                                   | BC026513                  |     |     | 2.5  |    |
| 1428048_at   | cDNA sequence BC027582                                   | BC027582                  |     |     | 2.3  |    |
| 1437475_at   | cDNA sequence BC028454                                   | BC028454                  |     |     | 2.3  |    |
| 1455378_at   | cDNA sequence BC057371                                   | BC057371                  |     |     | 2.6  |    |
| 1440819_s_at | cDNA sequence BC059842                                   | BC059842                  |     |     | 3.1  |    |
| 1435279_at   | cDNA sequence BC059842                                   | BC059842                  |     |     | 2.9  |    |
| 1434069_at   | cDNA sequence BC067047                                   | BC067047                  |     |     | 4.5  |    |
| 1448134_at   | cDNA sequence X99384                                     | X99384                    |     |     | 2.9  |    |
| 1453319_at   | cell division cycle and apoptosis regulator 1            | Ccar1                     |     |     | 2.8  |    |
| 1451306_at   | cell division cycle associated 7 like                    | Cdca7l                    |     |     | 2.6  |    |
| 1425639_at   | centaurin, alpha 2                                       | Cent2                     |     |     | 2.4  |    |
| 1433958_at   | centrobin, centrosomal BRCA2 interacting protein         | Centrob                   |     |     | 2.0  |    |
| 1457001_at   | centromere protein K                                     | Cenpk                     |     |     | 3.1  |    |
| 1431405_a_at | centrosome and spindle pole associated protein 1         | Csppl1                    |     |     | 5.1  |    |

| Probeset ID  | Gene Title                                              | Gene Symbol          | 8mo | 60d | 21d  | 6d |
|--------------|---------------------------------------------------------|----------------------|-----|-----|------|----|
| 1417496_at   | ceruloplasmin                                           | Cp                   |     |     | 2.3  |    |
| 1419609_at   | chemokine (C-C motif) receptor 1                        | Ccr1                 |     |     | 2.8  |    |
| 1424727_at   | chemokine (C-C motif) receptor 5                        | Ccr5                 |     |     | 3.0  |    |
| 1437668_at   | Chemokine (C-C motif) receptor-like 1                   | Ccr11                |     |     | 2.0  |    |
| 1427736_a_at | chemokine (C-C motif) receptor-like 2                   | Ccr12                |     |     | 9.0  |    |
| 1419698_at   | chemokine (C-X-C motif) ligand 11                       | Cxcl11 /// LOC630447 |     |     | 2.0  |    |
| 1419697_at   | chemokine (C-X-C motif) ligand 11                       | Cxcl11 /// LOC630447 |     |     | 6.6  |    |
| 1438148_at   | chemokine (C-X-C motif) ligand 3                        | Cxcl3                |     |     | 14.2 |    |
| 1419728_at   | chemokine (C-X-C motif) ligand 5                        | Cxcl5                |     |     | 2.2  |    |
| 1448710_at   | chemokine (C-X-C motif) receptor 4                      | Cxcr4                |     |     | 3.8  |    |
| 1434165_at   | chloride intracellular channel 6                        | Clc6                 |     |     | 2.2  |    |
| 1454866_s_at | chloride intracellular channel 6                        | Clc6                 |     |     | 2.7  |    |
| 1449227_at   | cholesterol 25-hydroxylase                              | Ch25h                |     |     | 8.3  |    |
| 1439314_at   | circadian locomoter output cycles kaput                 | Clock                |     |     | 3.1  |    |
| 1422869_at   | c-mer proto-oncogene tyrosine kinase                    | Mertk                |     |     | 2.3  |    |
| 1418897_at   | coagulation factor II                                   | F2                   |     |     | 2.1  |    |
| 1448931_at   | coagulation factor II (thrombin) receptor-like 1        | F2r1                 |     |     | 3.4  |    |
| 1427320_at   | coatamer protein complex, subunit gamma 2, antisense 2  | Copg2as2             |     |     | 2.3  |    |
| 1445440_at   | coiled coil domain containing 88A                       | Ccdc88a              |     |     | 10.6 |    |
| 1428066_at   | coiled-coil domain containing 120                       | Ccdc120              |     |     | 2.5  |    |
| 1454975_at   | coiled-coil domain containing 131                       | Ccdc131              |     |     | 2.0  |    |
| 1430035_at   | coiled-coil domain containing 132                       | Ccdc132              |     |     | 4.4  |    |
| 1432113_at   | coiled-coil domain containing 18                        | Ccdc18               |     |     | 3.2  |    |
| 1430303_at   | coiled-coil domain containing 41                        | Ccdc41               |     |     | 2.9  |    |
| 1449128_at   | coiled-coil domain containing 43                        | Ccdc43               |     |     | 2.1  |    |
| 1428311_at   | coiled-coil domain containing 6                         | Ccdc6                |     |     | 2.3  |    |
| 1454839_a_at | coiled-coil domain containing 84                        | Ccdc84               |     |     | 2.1  |    |
| 1425476_at   | collagen, type IV, alpha 5                              | Col4a5               |     |     | 3.0  |    |
| 1434479_at   | collagen, type V, alpha 1                               | Col5a1               |     |     | 2.4  |    |
| 1416740_at   | collagen, type V, alpha 1                               | Col5a1               |     |     | 3.2  |    |
| 1429280_at   | collagen, type XXII, alpha 1                            | Col22a1              |     |     | 4.7  |    |
| 1420703_at   | colony stimulating factor 2 receptor, alpha             | Csf2ra               |     |     | 2.0  |    |
| 1449360_at   | colony stimulating factor 2 receptor, beta 2            | Csf2rb2              |     |     | 7.7  |    |
| 1455660_at   | colony stimulating factor 2 receptor, beta              | Csf2rb               |     |     | 6.9  |    |
| 1419427_at   | colony stimulating factor 3 (granulocyte)               | Csf3                 |     |     | 3.6  |    |
| 1442082_at   | complement component 3a receptor 1                      | C3ar1                |     |     | 11.9 |    |
| 1419482_at   | complement component 3a receptor 1                      | C3ar1                |     |     | 7.7  |    |
| 1417314_at   | complement factor B                                     | Cfb                  |     |     | 2.6  |    |
| 1435792_at   | component of Sp100-rs /// predicted gene                | Csprs /// EG665317   |     |     | 3.0  |    |
| 1422649_at   | contactin 6                                             | Cntn6                |     |     | 2.5  |    |
| 1418721_at   | COP9 homolog, subunit 7b (Arabidopsis thaliana)         | Cops7b               |     |     | 2.2  |    |
| 1416246_a_at | coronin, actin binding protein 1A                       | Coro1a               |     |     | 4.3  |    |
| 1436983_at   | CREB binding protein                                    | Crebbp               |     |     | 2.5  |    |
| 1451075_s_at | CTD, RNA polymerase II, polypeptide A small phosphatase | Ctdsp2               |     |     | 3.9  |    |
| 1440740_at   | CTD RNA polymerase II, polypeptide A small phosphatase  | Ctdsp2               |     |     | 5.8  |    |
| 1420331_at   | C-type lectin domain family 4, member e                 | Clec4e               |     |     | 8.9  |    |

| Probeset ID  | Gene Title                                               | Gene Symbol            | 8mo | 60d | 21d  | 6d |
|--------------|----------------------------------------------------------|------------------------|-----|-----|------|----|
| 1420330_at   | C-type lectin domain family 4, member e                  | Clec4e                 |     |     | 20.7 |    |
| 1419627_s_at | C-type lectin domain family 4, member n                  | Clec4n                 |     |     | 6.6  |    |
| 1417039_a_at | cullin 7                                                 | Cul7                   |     |     | 2.9  |    |
| 1447500_at   | cut-like homeobox 2                                      | Cux2                   |     |     | 3.3  |    |
| 1453688_at   | CWF19-like 2, cell cycle control (S. pombe)              | Cwf19l2                |     |     | 4.6  |    |
| 1416122_at   | cyclin D2                                                | Ccnd2                  |     |     | 2.1  |    |
| 1455956_x_at | cyclin D2                                                | Ccnd2                  |     |     | 2.5  |    |
| 1438805_at   | cyclin D3                                                | Ccnd3                  |     |     | 2.8  |    |
| 1453399_at   | cyclin T2                                                | Ccnt2                  |     |     | 4.0  |    |
| 1432352_at   | cyclin Y                                                 | Ccny                   |     |     | 6.5  |    |
| 1434045_at   | cyclin-dependent kinase inhibitor 1B                     | Cdkn1b                 |     |     | 2.7  |    |
| 1452394_at   | cysteinyl-tRNA synthetase                                | Cars                   |     |     | 2.1  |    |
| 1416274_at   | cystinosis, nephropathic                                 | Ctns                   |     |     | 2.0  |    |
| 1425661_at   | cytidine and dCMP deaminase domain containing 1          | Cdadc1                 |     |     | 3.0  |    |
| 1450484_a_at | cytidine monophosphate (UMP-CMP) kinase 2, mitochondrial | Cmpk2                  |     |     | 10.6 |    |
| 1422978_at   | cytochrome b-245, beta polypeptide                       | Cybb                   |     |     | 2.2  |    |
| 1436778_at   | cytochrome b-245, beta polypeptide                       | Cybb                   |     |     | 6.4  |    |
| 1436779_at   | cytochrome b-245, beta polypeptide                       | Cybb                   |     |     | 10.3 |    |
| 1417277_at   | cytochrome P450, family 4, subfamily f, polypeptide 16   | Cyp4f16                |     |     | 3.5  |    |
| 1419959_s_at | cytoplasmic polyadenylated homeobox                      | Cphx /// LOC100039213  |     |     | 2.4  |    |
| 1452352_at   | cytotoxic T lymphocyte-associated protein 2 beta         | Ctla2b                 |     |     | 2.7  |    |
| 1429903_at   | D4, zinc and double PHD fingers family 2                 | Dpf2                   |     |     | 3.3  |    |
| 1435376_at   | DDHD domain containing 2                                 | Ddhd2                  |     |     | 2.4  |    |
| 1444590_at   | DDHD domain containing 2                                 | Ddhd2                  |     |     | 2.6  |    |
| 1441631_at   | DEAD (Asp-Glu-Ala-Asp) box polypeptide 24                | Ddx24                  |     |     | 3.8  |    |
| 1453852_at   | DEAD (Asp-Glu-Ala-Asp) box polypeptide 50                | Ddx50                  |     |     | 5.4  |    |
| 1453251_at   | DEAH (Asp-Glu-Ala-His) box polypeptide 30                | Dhx30                  |     |     | 5.5  |    |
| 1426915_at   | death associated protein kinase 1                        | Dapk1                  |     |     | 3.3  |    |
| 1437182_at   | death inducer-obliterator 1                              | Dido1                  |     |     | 2.7  |    |
| 1452220_at   | dedicator of cytokinesis 1                               | Dock1                  |     |     | 2.1  |    |
| 1435343_at   | dedicator of cytokinesis 10                              | Dock10                 |     |     | 4.1  |    |
| 1428852_at   | dedicator of cyto-kinesis 3                              | Dock3                  |     |     | 2.2  |    |
| 1435208_at   | deltex 3-like (Drosophila)                               | Dtx3l                  |     |     | 2.4  |    |
| 1439825_at   | deltex 3-like (Drosophila)                               | Dtx3l                  |     |     | 3.1  |    |
| 1433500_at   | DENN/MADD domain containing 2A                           | Dennd2a                |     |     | 4.2  |    |
| 1457500_at   | DEP domain containing 5                                  | Depdc5                 |     |     | 3.8  |    |
| 1429597_at   | developmental pluripotency associated 4                  | Dppa4                  |     |     | 5.4  |    |
| 1452169_a_at | diacylglycerol kinase zeta                               | Dgkz                   |     |     | 2.3  |    |
| 1451970_at   | diacylglycerol lipase, beta                              | Daglb                  |     |     | 2.2  |    |
| 1460571_at   | Dicer1, Dcr-1 homolog (Drosophila)                       | Dicer1                 |     |     | 2.7  |    |
| 1427941_at   | Dicer1, Dcr-1 homolog (Drosophila)                       | Dicer1                 |     |     | 2.9  |    |
| 1446169_at   | DiGeorge syndrome critical region gene 8                 | Dgcr8                  |     |     | 4.1  |    |
| 1452908_at   | DIP2 disco-interacting protein 2 homolog A (Drosophila)  | Dip2a /// LOC100044059 |     |     | 2.8  |    |
| 1437951_at   | DIS3 mitotic control homolog (S. cerevisiae)-like 2      | Dis3l2                 |     |     | 2.5  |    |
| 1435578_s_at | disabled homolog 1 (Drosophila)                          | Dab1                   |     |     | 2.4  |    |
| 1420498_a_at | disabled homolog 2 (Drosophila)                          | Dab2                   |     |     | 3.7  |    |

| Probeset ID  | Gene Title                                                  | Gene Symbol  | 8mo | 60d | 21d | 6d |
|--------------|-------------------------------------------------------------|--------------|-----|-----|-----|----|
| 1423063_at   | DNA methyltransferase 3A                                    | Dnmt3a       |     |     | 2.4 |    |
| 1423065_at   | DNA methyltransferase 3A                                    | Dnmt3a       |     |     | 2.5 |    |
| 1442489_at   | DNA segment, Chr 1, ERATO Doi 564, expressed                | D1Erttd564e  |     |     | 9.3 |    |
| 1447984_at   | DNA segment, Chr 1, ERATO Doi 75, expressed                 | D1Erttd75e   |     |     | 3.6 |    |
| 1449688_at   | DNA segment, Chr 10, ERATO Doi 610, expressed               | D10Erttd610e |     |     | 5.9 |    |
| 1419978_s_at | DNA segment, Chr 10, ERATO Doi 610, expressed               | D10Erttd610e |     |     | 6.8 |    |
| 1445273_at   | DNA segment, Chr 10, ERATO Doi 638, expressed               | D10Erttd638e |     |     | 3.9 |    |
| 1457539_at   | DNA segment, Chr 10, ERATO Doi 709, expressed               | D10Erttd709e |     |     | 6.8 |    |
| 1438810_at   | DNA segment, Chr 10, ERATO Doi 755, expressed               | D10Erttd755e |     |     | 6.7 |    |
| 1426780_at   | DNA segment, Chr 14, ERATO Doi 436, expressed               | D14Erttd436e |     |     | 2.7 |    |
| 1438868_at   | DNA segment, Chr 14, ERATO Doi 668, expressed               | D14Erttd668e |     |     | 2.3 |    |
| 1439980_at   | DNA segment, Chr 14, ERATO Doi 725, expressed               | D14Erttd725e |     |     | 4.8 |    |
| 1445999_at   | DNA segment, Chr 19, ERATO Doi 132, expressed               | D19Erttd132e |     |     | 3.6 |    |
| 1440417_at   | DNA segment, Chr 19, ERATO Doi 409, expressed               | D19Erttd409e |     |     | 2.5 |    |
| 1458414_at   | ddit4l                                                      | D2Erttd93e   |     |     | 5.9 |    |
| 1443490_at   | DNA segment, Chr 3, ERATO Doi 34, expressed                 | D3Erttd34e   |     |     | 2.1 |    |
| 1444872_at   | DNA segment, Chr 3, ERATO Doi 740, expressed                | D3Erttd740e  |     |     | 6.3 |    |
| 1457626_at   | DNA segment, Chr 3, Wayne State University 106, expressed   | D3Wsu106e    |     |     | 3.8 |    |
| 1443242_at   | DNA segment, Chr 5, ERATO Doi 121, expressed                | D5Erttd121e  |     |     | 2.5 |    |
| 1458934_at   | DNA segment, Chr 5, ERATO Doi 505, expressed                | D5Erttd505e  |     |     | 2.5 |    |
| 1460063_at   | DNA segment, Chr 5, ERATO Doi 798, expressed                | D5Erttd798e  |     |     | 3.7 |    |
| 1438788_at   | DNA segment, Chr 5, Wayne State University 152, expressed   | D5Wsu152e    |     |     | 4.3 |    |
| 1442069_at   | DNA segment, Chr 5, Wayne State University 178, expressed   | D5Wsu178e    |     |     | 4.2 |    |
| 1456056_a_at | DNA segment, Chr 6, Wayne State University 116, expressed   | D6Wsu116e    |     |     | 2.4 |    |
| 1460162_at   | DNA segment, Chr 8, ERATO Doi 124, expressed                | D8Erttd124e  |     |     | 2.1 |    |
| 1440499_at   | DNA segment, Chr 9, ERATO Doi 26, expressed                 | D9Erttd26e   |     |     | 3.0 |    |
| 1446102_at   | DNA segment, Chr 9, ERATO Doi 292, expressed                | D9Erttd292e  |     |     | 7.0 |    |
| 1434196_at   | DnaJ (Hsp40) homolog, subfamily A, member 4                 | Dnaja4       |     |     | 2.2 |    |
| 1447649_x_at | DnaJ (Hsp40) homolog, subfamily C, member 1                 | Dnajc1       |     |     | 3.3 |    |
| 1459791_at   | DnaJ (Hsp40) homolog, subfamily C, member 1                 | Dnajc1       |     |     | 3.6 |    |
| 1445337_at   | DnaJ (Hsp40) homolog, subfamily C, member 13                | Dnajc13      |     |     | 2.2 |    |
| 1442855_at   | dopey family member 1                                       | Dopey1       |     |     | 6.0 |    |
| 1428330_at   | dopey family member 2                                       | Dopey2       |     |     | 2.2 |    |
| 1439049_at   | DPH5 homolog (S. cerevisiae)                                | Dph5         |     |     | 3.5 |    |
| 1440615_at   | dual specificity phosphatase 16                             | Dusp16       |     |     | 2.9 |    |
| 1415834_at   | dual specificity phosphatase 6                              | Dusp6        |     |     | 3.7 |    |
| 1427416_x_at | dual specificity phosphatase 7                              | Dusp7        |     |     | 3.1 |    |
| 1452097_a_at | dual specificity phosphatase 7                              | Dusp7        |     |     | 3.2 |    |
| 1452382_at   | dynamin 3, opposite strand                                  | Dnm3os       |     |     | 3.2 |    |
| 1421544_at   | dynein, axonemal, heavy chain 11                            | Dnahc11      |     |     | 2.1 |    |
| 1445329_at   | dystrobrevin, beta                                          | Dtnb         |     |     | 3.1 |    |
| 1427682_a_at | early growth response 2                                     | Egr2         |     |     | 4.8 |    |
| 1427683_at   | early growth response 2                                     | Egr2         |     |     | 4.9 |    |
| 1428173_at   | echinoderm microtubule associated protein like 2            | Eml2         |     |     | 2.4 |    |
| 1450241_a_at | ecotropic viral integration site 2a                         | Evi2a        |     |     | 5.6 |    |
| 1440464_at   | ELAV (embryonic lethal, abnormal vision, Drosophila)-like 1 | Elavl1       |     |     | 3.9 |    |

| Probeset ID  | Gene Title                                                 | Gene Symbol | 8mo | 60d | 21d | 6d |
|--------------|------------------------------------------------------------|-------------|-----|-----|-----|----|
| 1448797_at   | ELK3, member of ETS oncogene family                        | Elk3        |     |     | 5.7 |    |
| 1442514_a_at | elongation factor RNA polymerase II-like 3                 | Ell3        |     |     | 3.4 |    |
| 1446228_at   | endoplasmic reticulum metalloproteinase 1                  | Ermp1       |     |     | 3.6 |    |
| 1437347_at   | endothelin receptor type B                                 | Ednrb       |     |     | 6.2 |    |
| 1426001_at   | eomesodermin homolog (Xenopus laevis)                      | Eomes       |     |     | 4.2 |    |
| 1435172_at   | eomesodermin homolog (Xenopus laevis)                      | Eomes       |     |     | 7.0 |    |
| 1430152_at   | epidermal growth factor receptor pathway substrate 15      | Eps15       |     |     | 2.6 |    |
| 1417018_at   | EGF-containing fibulin-like extracellular matrix protein 2 | Efemp2      |     |     | 3.9 |    |
| 1419431_at   | epiregulin                                                 | Ereg        |     |     | 4.0 |    |
| 1425624_at   | EPM2A (laforin) interacting protein 1                      | Epm2aip1    |     |     | 2.0 |    |
| 1434105_at   | EPM2A (laforin) interacting protein 1                      | Epm2aip1    |     |     | 2.1 |    |
| 1440175_at   | Epsin 2                                                    | Epn2        |     |     | 7.3 |    |
| 1444150_at   | erythrocyte protein band 4.1                               | Epb4.1      |     |     | 4.5 |    |
| 1418294_at   | erythrocyte protein band 4.1-like 4b                       | Epb4.1l4b   |     |     | 3.8 |    |
| 1441604_at   | Esterase D/formylglutathione hydrolase                     | Esd         |     |     | 2.0 |    |
| 1442864_at   | estrogen related receptor, alpha                           | Esrra       |     |     | 2.0 |    |
| 1428142_at   | ets variant gene 5                                         | Etv5        |     |     | 8.4 |    |
| 1427036_a_at | eukaryotic translation initiation factor 4, gamma 1        | Eif4g1      |     |     | 2.5 |    |
| 1438172_x_at | exonuclease domain containing 1                            | Exod1       |     |     | 2.1 |    |
| 1453359_at   | exosome component 1                                        | Exosc1      |     |     | 3.0 |    |
| 1417730_at   | exostoses (multiple) 1                                     | Ext1        |     |     | 2.1 |    |
| 1445535_at   | expressed sequence AA407107                                | AA407107    |     |     | 3.8 |    |
| 1449750_at   | expressed sequence AA407331                                | AA407331    |     |     | 4.6 |    |
| 1440717_at   | expressed sequence AA407881                                | AA407881    |     |     | 2.2 |    |
| 1433551_at   | expressed sequence AI427515                                | AI427515    |     |     | 2.8 |    |
| 1457150_at   | expressed sequence AI428301                                | AI428301    |     |     | 2.7 |    |
| 1437176_at   | expressed sequence AI451557                                | AI451557    |     |     | 4.2 |    |
| 1435665_at   | expressed sequence AI451617                                | AI451617    |     |     | 6.3 |    |
| 1443972_at   | expressed sequence AI465300                                | AI465300    |     |     | 4.7 |    |
| 1437570_at   | expressed sequence AI503301                                | AI503301    |     |     | 4.6 |    |
| 1457035_at   | expressed sequence AI607873                                | AI607873    |     |     | 9.2 |    |
| 1434067_at   | expressed sequence AI662270                                | AI662270    |     |     | 4.7 |    |
| 1440277_at   | expressed sequence AU041474                                | AU041474    |     |     | 2.9 |    |
| 1434372_at   | expressed sequence AW112010                                | AW112010    |     |     | 5.5 |    |
| 1444273_at   | expressed sequence AW555355                                | AW555355    |     |     | 2.4 |    |
| 1449765_at   | expressed sequence C76628                                  | C76628      |     |     | 2.1 |    |
| 1444467_at   | expressed sequence C77534                                  | C77534      |     |     | 3.3 |    |
| 1444677_at   | expressed sequence C77673                                  | C77673      |     |     | 3.3 |    |
| 1459469_at   | expressed sequence C78516                                  | C78516      |     |     | 3.2 |    |
| 1456931_at   | expressed sequence C85363                                  | C85363      |     |     | 9.9 |    |
| 1420288_at   | expressed sequence T25656                                  | T25656      |     |     | 2.9 |    |
| 1432337_at   | Fanconi anemia, complementation group L                    | Fancl       |     |     | 2.5 |    |
| 1437544_at   | far upstream element (FUSE) binding protein 1              | Fubp1       |     |     | 2.8 |    |
| 1433857_at   | FAT tumor suppressor homolog 1 (Drosophila)                | Fat1        |     |     | 2.2 |    |
| 1423100_at   | FBJ osteosarcoma oncogene                                  | Fos         |     |     | 2.1 |    |
| 1456220_at   | F-box and leucine-rich repeat protein 7                    | Fbxl7       |     |     | 2.7 |    |

| Probeset ID  | Gene Title                                              | Gene Symbol       | 8mo | 60d | 21d  | 6d |
|--------------|---------------------------------------------------------|-------------------|-----|-----|------|----|
| 1438336_at   | F-box and WD-40 domain protein 11                       | Fbxw11            |     |     | 2.7  |    |
| 1447294_at   | F-box and WD-40 domain protein 11                       | Fbxw11            |     |     | 2.8  |    |
| 1451524_at   | F-box and WD-40 domain protein 2                        | Fbxw2             |     |     | 2.1  |    |
| 1436487_x_at | F-box and WD-40 domain protein 2                        | Fbxw2             |     |     | 2.7  |    |
| 1436206_at   | F-box protein 10                                        | Fbxo10            |     |     | 2.5  |    |
| 1448747_at   | F-box protein 32                                        | Fbxo32            |     |     | 2.4  |    |
| 1440376_at   | F-box protein 41                                        | Fbxo41            |     |     | 3.4  |    |
| 1417876_at   | Fc receptor, IgG, high affinity I                       | Fcgr1             |     |     | 17.5 |    |
| 1448891_at   | Fc receptor-like S, scavenger receptor                  | Fcrls             |     |     | 2.6  |    |
| 1442970_at   | FCH and double SH3 domains 2                            | Fchsd2            |     |     | 7.0  |    |
| 1442453_at   | FCH domain only 2                                       | Fcho2             |     |     | 2.4  |    |
| 1434424_at   | feline leukemia virus subgroup C cellular receptor 1    | Flvcr1            |     |     | 2.3  |    |
| 1434285_at   | FERM domain containing 4A                               | Frm�4a            |     |     | 2.4  |    |
| 1451264_at   | FERM domain containing 6                                | Frmđ6             |     |     | 2.8  |    |
| 1427021_s_at | ferritin heavy chain 1                                  | Fth1              |     |     | 2.4  |    |
| 1418364_a_at | ferritin light chain 1 /// ferritin light chain 2       | EG665937 /// Ftł1 |     |     | 2.2  |    |
| 1422302_s_at | ferritin light chain 1 /// ferritin light chain 2       | EG665937 /// Ftł1 |     |     | 2.1  |    |
| 1419540_at   | ferritin, heavy polypeptide-like 17 /// predicted gene  | EG434726          |     |     | 2.4  |    |
| 1421855_at   | fibrinogen-like protein 2                               | Fgl2              |     |     | 4.0  |    |
| 1436551_at   | fibroblast growth factor receptor 1                     | Fgfr1             |     |     | 2.3  |    |
| 1426642_at   | fibronectin 1                                           | Fn1               |     |     | 2.4  |    |
| 1418243_at   | ficolin A                                               | Fcna              |     |     | 3.5  |    |
| 1445534_at   | Filamin, beta                                           | Flnb              |     |     | 2.2  |    |
| 1416803_at   | FK506 binding protein 7                                 | Fkbp7             |     |     | 2.2  |    |
| 1437687_x_at | FK506 binding protein 9                                 | Fkbp9             |     |     | 2.0  |    |
| 1439189_at   | folliculin interacting protein 2                        | Fnip2             |     |     | 2.2  |    |
| 1434458_at   | follistatin                                             | Fst               |     |     | 2.9  |    |
| 1416693_at   | forkhead box C2                                         | Foxc2             |     |     | 9.9  |    |
| 1434939_at   | forkhead box F1a                                        | Foxf1a            |     |     | 2.2  |    |
| 1420374_at   | forkhead box J2                                         | Foxj2             |     |     | 2.2  |    |
| 1436925_at   | forkhead box N3                                         | Foxn3             |     |     | 2.2  |    |
| 1434002_at   | forkhead box N3                                         | Foxn3             |     |     | 2.2  |    |
| 1434831_a_at | forkhead box O3a                                        | Foxo3a            |     |     | 2.3  |    |
| 1434832_at   | forkhead box O3a                                        | Foxo3a            |     |     | 2.3  |    |
| 1455242_at   | forkhead box P1                                         | Foxp1             |     |     | 2.1  |    |
| 1435222_at   | forkhead box P1                                         | Foxp1             |     |     | 2.2  |    |
| 1455280_at   | Fras1 related extracellular matrix protein 1            | Frem1             |     |     | 2.1  |    |
| 1431066_at   | fucosyltransferase 11                                   | Fut11             |     |     | 2.0  |    |
| 1448765_at   | Fyn proto-oncogene                                      | Fyn               |     |     | 2.6  |    |
| 1417558_at   | Fyn proto-oncogene                                      | Fyn               |     |     | 2.6  |    |
| 1460578_at   | FYVE, RhoGEF and PH domain containing 5                 | Fgd5              |     |     | 3.4  |    |
| 1419721_at   | G protein-coupled receptor 109A                         | Gpr109a           |     |     | 3.3  |    |
| 1439255_s_at | G protein-coupled receptor 137B                         | Gpr137b           |     |     | 2.8  |    |
| 1439256_x_at | G protein-coupled receptor 137B, pseudogene             | Gpr137b-ps        |     |     | 2.7  |    |
| 1424455_at   | G protein-coupled receptor associated sorting protein 1 | Gprasp1           |     |     | 2.1  |    |
| 1451672_at   | G protein-coupled receptor kinase 6                     | Grk6              |     |     | 2.4  |    |

| Probeset ID  | Gene Title                                                  | Gene Symbol            | 8mo | 60d | 21d | 6d |
|--------------|-------------------------------------------------------------|------------------------|-----|-----|-----|----|
| 1450187_a_at | galactose-1-phosphate uridyl transferase                    | Galt                   |     |     | 2.1 |    |
| 1459917_at   | gametogenetin binding protein 2                             | Ggnbp2                 |     |     | 3.2 |    |
| 1416522_a_at | gene rich cluster, C10 gene                                 | Grccl10                |     |     | 2.6 |    |
| 1438888_at   | germ cell-less homolog 1 (Drosophila)                       | Gmcl1                  |     |     | 4.4 |    |
| 1457228_x_at | GLE1 RNA export mediator (yeast)                            | Gle1                   |     |     | 3.2 |    |
| 1440720_s_at | GLE1 RNA export mediator (yeast)                            | Gle1                   |     |     | 3.3 |    |
| 1440540_at   | GLE1 RNA export mediator (yeast)                            | Gle1 /// LOC383774     |     |     | 5.5 |    |
| 1433716_x_at | GDNF family receptor alpha 2                                | Gfra2                  |     |     | 3.9 |    |
| 1455154_at   | GLI-Kruppel family member GLI3                              | Gli3                   |     |     | 2.1 |    |
| 1456067_at   | GLI-Kruppel family member GLI3                              | Gli3                   |     |     | 2.3 |    |
| 1430353_at   | GLIS family zinc finger 3                                   | Glis3                  |     |     | 5.5 |    |
| 1454818_at   | glucocorticoid modulatory element binding protein 2         | Gmeb2                  |     |     | 2.1 |    |
| 1450081_x_at | glucose phosphate isomerase 1                               | Gpi1                   |     |     | 2.2 |    |
| 1420997_a_at | glucose phosphate isomerase 1                               | Gpi1                   |     |     | 2.3 |    |
| 1422489_at   | glucosidase 1                                               | Gcs1                   |     |     | 2.1 |    |
| 1448124_at   | glucuronidase, beta                                         | Gusb                   |     |     | 2.0 |    |
| 1438385_s_at | glutamic pyruvate transaminase (alanine aminotransferase) 2 | Gpt2                   |     |     | 2.1 |    |
| 1416592_at   | glutaredoxin                                                | Glrx                   |     |     | 5.0 |    |
| 1459850_x_at | glycine receptor, beta subunit                              | Glrb                   |     |     | 2.1 |    |
| 1439931_at   | glycogen synthase kinase 3 beta                             | Gsk3b                  |     |     | 3.6 |    |
| 1418483_a_at | glycoprotein galactosyltransferase alpha 1, 3               | Ggta1                  |     |     | 3.8 |    |
| 1434007_at   | glycosyltransferase-like 1B                                 | Gyltl1b                |     |     | 4.8 |    |
| 1429293_at   | glypican 2 (cerebroglycan)                                  | Gpc2                   |     |     | 2.3 |    |
| 1421088_at   | glypican 4                                                  | Gpc4                   |     |     | 2.1 |    |
| 1448580_at   | golgi apparatus protein 1                                   | Glg1                   |     |     | 2.4 |    |
| 1460554_s_at | golgi apparatus protein 1                                   | Glg1                   |     |     | 2.5 |    |
| 1435032_at   | golgi autoantigen, golgin subfamily b, macrogolgin 1        | Golgb1                 |     |     | 3.1 |    |
| 1417390_at   | GPN-loop GTPase 1                                           | Gpn1                   |     |     | 2.2 |    |
| 1427046_at   | grainyhead-like 2 (Drosophila)                              | Grhl2                  |     |     | 2.2 |    |
| 1452151_at   | GRAM domain containing 4                                    | Gramd4                 |     |     | 2.4 |    |
| 1438629_x_at | granulin                                                    | Grn                    |     |     | 2.0 |    |
| 1448148_at   | granulin                                                    | Grn                    |     |     | 2.2 |    |
| 1451856_at   | GRB10 interacting GYF protein 2                             | Gigyf2                 |     |     | 4.7 |    |
| 1417315_at   | GRIP1 associated protein 1                                  | Gripap1                |     |     | 3.1 |    |
| 1453851_a_at | growth arrest and DNA-damage-inducible 45 gamma             | Gadd45g                |     |     | 3.4 |    |
| 1455904_at   | growth arrest specific 5                                    | Gas5                   |     |     | 2.2 |    |
| 1436222_at   | growth arrest specific 5                                    | Gas5                   |     |     | 2.3 |    |
| 1457093_at   | GTPase activating protein and VPS9 domains 1                | Gapvd1                 |     |     | 5.9 |    |
| 1446684_at   | GTPase activating RANGAP domain-like 1                      | Garn1                  |     |     | 2.4 |    |
| 1429184_at   | GTPase, very large interferon inducible 1                   | Gvin1 /// LOC100042856 |     |     | 3.4 |    |
| 1419470_at   | guanine nucleotide binding protein (G protein), beta 4      | Gnb4                   |     |     | 2.8 |    |
| 1428156_at   | guanine nucleotide binding protein (G protein), gamma 2     | Gng2                   |     |     | 2.6 |    |
| 1428939_s_at | guanine nucleotide binding protein, alpha q polypeptide     | Gnaq                   |     |     | 4.3 |    |
| 1429180_at   | guanosine monophosphate reductase 2                         | Gmpr2                  |     |     | 2.5 |    |
| 1418240_at   | guanylate nucleotide binding protein 2                      | Gbp2                   |     |     | 2.1 |    |
| 1426363_x_at | H2A histone family, member Y2                               | H2afy2                 |     |     | 3.1 |    |

| Probeset ID  | Gene Title                                                                  | Gene Symbol       | 8mo | 60d | 21d | 6d |
|--------------|-----------------------------------------------------------------------------|-------------------|-----|-----|-----|----|
| 1421612_a_at | H2A histone family, member Y3, member Y2                                    | H2afy2 /// H2afy3 |     |     | 3.1 |    |
| 1434060_at   | Hect domain and RCC1 (CHC1)                                                 | Herc1             |     |     | 2.1 |    |
| 1444599_at   | Hect domain and RLD 4                                                       | Herc4             |     |     | 4.8 |    |
| 1446224_at   | HECT domain containing 2                                                    | Hectd2            |     |     | 5.9 |    |
| 1415703_at   | HECT, UBA and WWE domain containing 1                                       | Huwe1             |     |     | 3.8 |    |
| 1419234_at   | helicase (DNA) B                                                            | Helb              |     |     | 3.6 |    |
| 1419235_s_at | helicase (DNA) B                                                            | Helb              |     |     | 6.0 |    |
| 1423319_at   | hematopoietically expressed homeobox                                        | Hhex              |     |     | 2.1 |    |
| 1449455_at   | hemopoietic cell kinase                                                     | Hck               |     |     | 2.4 |    |
| 1433977_at   | heparan sulfate (glucosamine) 3-O-sulfotransferase 3B1                      | Hs3st3b1          |     |     | 7.4 |    |
| 1438913_x_at | hepatoma-derived growth factor, related protein 2                           | Hdgrfp2           |     |     | 3.0 |    |
| 1450647_at   | Hermansky-Pudlak syndrome 3 homolog (human)                                 | Hps3              |     |     | 2.3 |    |
| 1436549_a_at | heterogeneous nuclear ribonucleoprotein A1                                  | Hnrnpa1           |     |     | 2.0 |    |
| 1424251_a_at | heterogeneous nuclear ribonucleoprotein D-like                              | Hnrpd1            |     |     | 2.3 |    |
| 1424252_at   | heterogeneous nuclear ribonucleoprotein D-like                              | Hnrpd1            |     |     | 3.0 |    |
| 1415963_at   | heterogeneous nuclear ribonucleoprotein H2                                  | Hnrph2            |     |     | 2.2 |    |
| 1434390_at   | Heterogeneous nuclear ribonucleoprotein U                                   | Hnrnpu            |     |     | 2.4 |    |
| 1437874_s_at | hexosaminidase B                                                            | Hexb              |     |     | 3.0 |    |
| 1442466_a_at | histidine acid phosphatase domain containing 2A                             | Hisppd2a          |     |     | 4.6 |    |
| 1426048_s_at | histidine rich calcium binding protein /// transcription factor AP-2, alpha | Hrc /// Tcfap2a   |     |     | 3.4 |    |
| 1435290_x_at | histocompatibility 2, class II antigen A, alpha                             | H2-Aa             |     |     | 2.2 |    |
| 1422892_s_at | histocompatibility 2, class II antigen E alpha                              | H2-Ea             |     |     | 2.8 |    |
| 1425917_at   | histocompatibility 28                                                       | H28               |     |     | 5.0 |    |
| 1422870_at   | homeo box C4                                                                | Hoxc4             |     |     | 2.3 |    |
| 1443020_at   | homeobox containing 1                                                       | Hmbox1            |     |     | 2.6 |    |
| 1425983_x_at | homeodomain interacting protein kinase 2                                    | Hipk2             |     |     | 2.2 |    |
| 1424863_a_at | homeodomain interacting protein kinase 2                                    | Hipk2             |     |     | 2.8 |    |
| 1433736_at   | host cell factor C1                                                         | Hcfc1             |     |     | 2.3 |    |
| 1442842_at   | Hspb associated protein 1                                                   | Hspbap1           |     |     | 2.2 |    |
| 1422018_at   | human immunodeficiency virus type I enhancer binding protein 2              | Hivep2            |     |     | 2.7 |    |
| 1456667_at   | huntingtin                                                                  | Htt               |     |     | 3.2 |    |
| 1434557_at   | huntingtin interacting protein 1                                            | Hip1              |     |     | 2.4 |    |
| 1429871_at   | hyaluronan mediated motility receptor (RHAMM)                               | Hmnr              |     |     | 3.4 |    |
| 1444908_at   | hyaluronic acid binding protein 4                                           | Habp4             |     |     | 2.0 |    |
| 1442732_at   | hydroxyacyl-Coenzyme A dehydrogenase                                        | Hadhb             |     |     | 2.1 |    |
| 1425421_at   | hypothetical LOC100134980                                                   | LOC100134980      |     |     | 2.5 |    |
| 1457464_at   | hypothetical LOC403342                                                      | C130015C19        |     |     | 3.8 |    |
| 1442992_at   | hypothetical LOC403343                                                      | 130004C03         |     |     | 6.1 |    |
| 1441349_at   | hypothetical LOC552904                                                      | LOC552904         |     |     | 2.8 |    |
| 1441546_at   | hypothetical LOC624524                                                      | LOC624524         |     |     | 2.6 |    |
| 1455510_at   | hypothetical protein LOC100039483                                           | LOC100039483      |     |     | 3.4 |    |
| 1446177_at   | Hypothetical protein LOC100041249                                           | LOC100041249      |     |     | 3.3 |    |
| 1440254_at   | hypothetical protein LOC100041277                                           | LOC100041277      |     |     | 2.9 |    |
| 1446168_at   | hypothetical protein LOC100041495                                           | LOC100041495      |     |     | 3.0 |    |
| 1459561_at   | Hypothetical protein LOC100042603                                           | LOC100042603      |     |     | 2.6 |    |
| 1444663_at   | hypothetical protein LOC100047469                                           | LOC100047469      |     |     | 3.6 |    |

| Probeset ID  | Gene Title                                                          | Gene Symbol            | 8mo | 60d | 21d  | 6d |
|--------------|---------------------------------------------------------------------|------------------------|-----|-----|------|----|
| 1456662_at   | hypothetical protein LOC546058                                      | LOC546058              |     |     | 5.7  |    |
| 1425424_at   | hypothetical protein LOC620031                                      | MGC7817                |     |     | 4.9  |    |
| 1418825_at   | immunity-related GTPase family, M                                   | Irgm                   |     |     | 2.4  |    |
| 1449700_at   | Immunoglobulin (CD79A) binding protein 1                            | Igbbp1                 |     |     | 2.3  |    |
| 1420000_s_at | immunoglobulin (CD79A) binding protein 1                            | Igbbp1                 |     |     | 2.7  |    |
| 1421408_at   | immunoglobulin superfamily, member 6                                | IgSF6                  |     |     | 3.4  |    |
| 1427381_at   | immunoresponsive gene 1                                             | Irg1                   |     |     | 3.4  |    |
| 1422537_a_at | inhibitor of DNA binding 2                                          | Id2                    |     |     | 2.8  |    |
| 1415851_a_at | inosine 5'-phosphate dehydrogenase 2                                | Impdh2                 |     |     | 2.1  |    |
| 1415852_at   | inosine 5'-phosphate dehydrogenase 2                                | Impdh2                 |     |     | 2.5  |    |
| 1417297_at   | inositol 1,4,5-triphosphate receptor 3                              | Itpr3                  |     |     | 2.0  |    |
| 1428373_at   | inositol hexaphosphate kinase 2                                     | Ihpk2                  |     |     | 2.1  |    |
| 1447757_x_at | inositol polyphosphate-5-phosphatase F                              | Inpp5f                 |     |     | 2.9  |    |
| 1433542_at   | inositol polyphosphate-5-phosphatase F                              | Inpp5f                 |     |     | 3.2  |    |
| 1434446_at   | insulin receptor                                                    | Insr                   |     |     | 2.2  |    |
| 1441429_at   | insulin receptor substrate 4                                        | Irs4                   |     |     | 2.7  |    |
| 1455223_at   | insulin-like growth factor 2 mRNA binding protein 1                 | Igf2bp1                |     |     | 3.5  |    |
| 1424112_at   | insulin-like growth factor 2 receptor                               | Igf2r                  |     |     | 2.1  |    |
| 1424111_at   | insulin-like growth factor 2 receptor                               | Igf2r                  |     |     | 3.2  |    |
| 1428967_at   | insulin-like growth factor I receptor                               | Igf1r                  |     |     | 2.4  |    |
| 1452982_at   | insulin-like growth factor I receptor                               | Igf1r                  |     |     | 2.7  |    |
| 1426943_at   | integrator complex subunit 1                                        | Ints1                  |     |     | 2.3  |    |
| 1443128_at   | integrator complex subunit 6                                        | Ints6                  |     |     | 5.5  |    |
| 1456775_at   | integrator complex subunit 8                                        | Ints8                  |     |     | 3.6  |    |
| 1426919_at   | integrin beta 1 (fibronectin receptor beta)                         | Irgb1                  |     |     | 2.1  |    |
| 1455257_at   | integrin beta 3                                                     | Irgb3                  |     |     | 2.5  |    |
| 1452348_s_at | interferon activated gene 203 /// interferon activated gene 204     | Ifi203 /// Ifi204      |     |     | 10.1 |    |
| 1417292_at   | interferon gamma inducible protein 47                               | Ifi47                  |     |     | 2.7  |    |
| 1419042_at   | interferon inducible GTPase 1 /// hypothetical protein LOC100044196 | Igpp1 /// LOC100044196 |     |     | 3.6  |    |
| 1448436_a_at | interferon regulatory factor 1                                      | Irf1                   |     |     | 2.0  |    |
| 1418265_s_at | interferon regulatory factor 2                                      | Irf2                   |     |     | 2.0  |    |
| 1417244_a_at | interferon regulatory factor 7                                      | Irf7                   |     |     | 2.3  |    |
| 1426278_at   | interferon, alpha-inducible protein 27                              | Ifi27                  |     |     | 4.8  |    |
| 1449025_at   | interferon-induced protein with tetratricopeptide repeats 3         | Ifit3                  |     |     | 12.7 |    |
| 1421473_at   | interleukin 1 alpha                                                 | Il1a                   |     |     | 2.4  |    |
| 1425663_at   | interleukin 1 receptor antagonist                                   | Il1rn                  |     |     | 9.7  |    |
| 1451798_at   | interleukin 1 receptor antagonist                                   | Il1rn                  |     |     | 17.8 |    |
| 1419532_at   | interleukin 1 receptor, type II                                     | Il1r2                  |     |     | 5.3  |    |
| 1450330_at   | interleukin 10                                                      | Il10                   |     |     | 6.8  |    |
| 1418219_at   | interleukin 15                                                      | Il15                   |     |     | 2.4  |    |
| 1429893_at   | interleukin 17 receptor D                                           | Il17rd                 |     |     | 3.4  |    |
| 1416295_a_at | interleukin 2 receptor, gamma chain                                 | Il2rg                  |     |     | 2.3  |    |
| 1448575_at   | interleukin 7 receptor                                              | Il7r                   |     |     | 3.0  |    |
| 1433885_at   | IQ motif containing GTPase activating protein 2                     | Iqgap2                 |     |     | 2.6  |    |
| 1435992_at   | IQ motif containing with AAA domain                                 | Iqca                   |     |     | 2.3  |    |
| 1431316_at   | itchy, E3 ubiquitin protein ligase                                  | Itch                   |     |     | 3.1  |    |

| Probeset ID  | Gene Title                                                      | Gene Symbol | 8mo | 60d | 21d  | 6d |
|--------------|-----------------------------------------------------------------|-------------|-----|-----|------|----|
| 1454923_at   | IWS1 homolog (S. cerevisiae)                                    | lws1        |     |     | 2.1  |    |
| 1433803_at   | Janus kinase 1                                                  | Jak1        |     |     | 2.0  |    |
| 1428320_at   | jumonji domain containing 1B                                    | Jmjd1b      |     |     | 2.1  |    |
| 1439998_at   | jumonji domain containing 1C                                    | Jmjd1c      |     |     | 5.3  |    |
| 1437106_at   | jumonji, AT rich interactive domain 1A (Rbp2 like)              | Jarid1a     |     |     | 2.2  |    |
| 1457482_at   | jumonji, AT rich interactive domain 1B (Rbp2 like)              | Jarid1b     |     |     | 4.4  |    |
| 1442278_at   | Jumonji, AT rich interactive domain 1B (Rbp2 like)              | Jarid1b     |     |     | 7.0  |    |
| 1422697_s_at | jumonji, AT rich interactive domain 2                           | Jarid2      |     |     | 2.2  |    |
| 1422698_s_at | jumonji, AT rich interactive domain 2                           | Jarid2      |     |     | 2.8  |    |
| 1450350_a_at | Jun dimerization protein 2                                      | Jdp2        |     |     | 2.1  |    |
| 1449034_at   | kallikrein B, plasma 1                                          | Klkb1       |     |     | 2.6  |    |
| 1419722_at   | kallikrein related-peptidase 8                                  | Klk8        |     |     | 2.4  |    |
| 1446255_at   | KCNQ1 overlapping transcript 1                                  | Kcnq1ot1    |     |     | 3.5  |    |
| 1442029_at   | KCNQ1 overlapping transcript 1                                  | Kcnq1ot1    |     |     | 8.7  |    |
| 1435786_at   | kelch-like 12 (Drosophila)                                      | Klhl12      |     |     | 2.2  |    |
| 1426978_at   | kelch-like 2, Mayven (Drosophila)                               | Klhl2       |     |     | 2.0  |    |
| 1436557_at   | keratin 73                                                      | Krt73       |     |     | 2.2  |    |
| 1442252_at   | kinesin family member 13A                                       | Kif13a      |     |     | 3.3  |    |
| 1455746_at   | kinesin family member 13A                                       | Kif13a      |     |     | 3.3  |    |
| 1446507_at   | Kinesin family member 24                                        | Kif24       |     |     | 5.2  |    |
| 1460559_at   | KN motif and ankyrin repeat domains 2                           | Kank2       |     |     | 2.3  |    |
| 1442125_at   | KRIT1, ankyrin repeat containing                                | Krit1       |     |     | 7.3  |    |
| 1416350_at   | Kruppel-like factor 16                                          | Klf16       |     |     | 2.0  |    |
| 1417395_at   | Kruppel-like factor 4 (gut)                                     | Klf4        |     |     | 2.0  |    |
| 1419354_at   | Kruppel-like factor 7 (ubiquitous)                              | Klf7        |     |     | 2.1  |    |
| 1419355_at   | Kruppel-like factor 7 (ubiquitous)                              | Klf7        |     |     | 2.7  |    |
| 1457670_s_at | lamin A                                                         | Lmna        |     |     | 2.4  |    |
| 1425472_a_at | lamin A                                                         | Lmna        |     |     | 2.6  |    |
| 1427010_s_at | laminin, alpha 5                                                | Lama5       |     |     | 2.0  |    |
| 1427009_at   | laminin, alpha 5                                                | Lama5       |     |     | 2.2  |    |
| 1428510_at   | latrophilin 1                                                   | Lphn1       |     |     | 4.3  |    |
| 1421217_a_at | lectin, galactose binding, soluble 9                            | Lgals9      |     |     | 2.8  |    |
| 1448380_at   | lectin, galactoside-binding, soluble, 3 binding protein         | Lgals3bp    |     |     | 2.0  |    |
| 1444037_at   | lectin, mannose-binding, 1                                      | Lman1       |     |     | 2.6  |    |
| 1416621_at   | lethal giant larvae homolog 1 (Drosophila)                      | Llgl1       |     |     | 2.2  |    |
| 1433505_a_at | leucine rich repeat containing 8D                               | Lrrc8d      |     |     | 2.3  |    |
| 1455489_at   | leucine rich repeat transmembrane neuronal 2                    | Lrrtm2      |     |     | 6.2  |    |
| 1448352_at   | leucine zipper protein 1                                        | Luzp1       |     |     | 2.3  |    |
| 1433783_at   | LIM domain binding 3                                            | Ldb3        |     |     | 3.8  |    |
| 1440167_s_at | LIM domain containing preferred translocation partner in lipoma | Lpp         |     |     | 2.3  |    |
| 1458582_at   | lin-54 homolog (C. elegans)                                     | Lin54       |     |     | 2.7  |    |
| 1449172_a_at | lin-7 homolog B (C. elegans)                                    | Lin7b       |     |     | 7.0  |    |
| 1439239_at   | lin-7 homolog B (C. elegans)                                    | Lin7b       |     |     | 12.4 |    |
| 1460651_at   | linker for activation of T cells                                | Lat         |     |     | 2.1  |    |
| 1452836_at   | lipin 2                                                         | Lpin2       |     |     | 2.1  |    |
| 1417741_at   | liver glycogen phosphorylase                                    | Pygl        |     |     | 3.1  |    |

| Probeset ID  | Gene Title                                                              | Gene Symbol | 8mo | 60d | 21d  | 6d |
|--------------|-------------------------------------------------------------------------|-------------|-----|-----|------|----|
| 1442258_at   | lon peptidase 2, peroxisomal                                            | Lonp2       |     |     | 3.6  |    |
| 1426288_at   | low density lipoprotein receptor-related protein 4                      | Lrp4        |     |     | 2.1  |    |
| 1436766_at   | LUC7-like 2 (S. cerevisiae)                                             | Luc7l2      |     |     | 3.3  |    |
| 1454969_at   | LY6/PLAUR domain containing 6                                           | Lypd6       |     |     | 2.7  |    |
| 1449328_at   | lymphocyte antigen 75                                                   | Ly75        |     |     | 2.2  |    |
| 1422903_at   | lymphocyte antigen 86                                                   | Ly86        |     |     | 8.5  |    |
| 1451359_at   | lysophosphatidylcholine acyltransferase 1                               | Lpcat1      |     |     | 5.2  |    |
| 1423140_at   | lysosomal acid lipase A                                                 | Lipa        |     |     | 4.1  |    |
| 1417721_s_at | lysosomal-associated protein transmembrane 5                            | Laptm5      |     |     | 2.2  |    |
| 1423848_at   | M phase phosphoprotein 6                                                | Mphosph6    |     |     | 2.0  |    |
| 1431159_at   | MACRO domain containing 2                                               | Macro2      |     |     | 13.4 |    |
| 1438467_at   | macrophage galactose N-acetyl-galactosamine specific lectin 2           | Mgl2        |     |     | 4.8  |    |
| 1448061_at   | macrophage scavenger receptor 1                                         | Msr1        |     |     | 12.2 |    |
| 1457836_at   | major facilitator superfamily domain containing 11                      | Mfsd11      |     |     | 2.4  |    |
| 1429108_at   | male-specific lethal 2-like 1 (Drosophila)                              | Msl2l1      |     |     | 2.5  |    |
| 1417110_at   | mannosidase 1, alpha                                                    | Man1a       |     |     | 2.4  |    |
| 1436193_at   | mannosidase, alpha, class 1C, member 1                                  | Man1c1      |     |     | 2.7  |    |
| 1426914_at   | MARVEL (membrane-associating) domain containing 2                       | Marveld2    |     |     | 2.5  |    |
| 1436796_at   | matrin 3                                                                | Matr3       |     |     | 2.8  |    |
| 1458508_at   | matrin 3                                                                | Matr3       |     |     | 4.9  |    |
| 1417256_at   | matrix metalloproteinase 13                                             | Mmp13       |     |     | 13.2 |    |
| 1421977_at   | matrix metalloproteinase 19                                             | Mmp19       |     |     | 3.2  |    |
| 1448291_at   | matrix metalloproteinase 9                                              | Mmp9        |     |     | 3.2  |    |
| 1434746_at   | MAX gene associated                                                     | Mga         |     |     | 2.1  |    |
| 1441287_at   | Mbt domain containing 1                                                 | Mbtd1       |     |     | 3.5  |    |
| 1453160_at   | mediator complex subunit 13                                             | Med13       |     |     | 2.2  |    |
| 1434603_at   | mediator complex subunit 13-like                                        | Med13l      |     |     | 2.7  |    |
| 1437632_at   | mediator complex subunit 14                                             | Med14       |     |     | 3.9  |    |
| 1450229_at   | mediator complex subunit 14                                             | Med14       |     |     | 3.0  |    |
| 1441617_at   | mediator complex subunit 15                                             | Med15       |     |     | 6.0  |    |
| 1425585_at   | mediator of RNA polymerase II transcription, subunit 12 homolog (yeast) | Med12       |     |     | 3.1  |    |
| 1453197_at   | mediator of RNA polymerase II transcription, subunit 25 homolog (yeast) | Med25       |     |     | 2.1  |    |
| 1452606_at   | meiotic nuclear divisions 1 homolog (S. cerevisiae)                     | Mnd1        |     |     | 2.1  |    |
| 1416357_a_at | melanoma cell adhesion molecule                                         | Mcam        |     |     | 5.9  |    |
| 1450919_at   | membrane protein, palmitoylated                                         | Mpp1        |     |     | 2.0  |    |
| 1458690_at   | membrane-associated ring finger (C3HC4) 7                               | March7      |     |     | 3.5  |    |
| 1448240_at   | membrane-bound transcription factor peptidase, site 1                   | Mbtps1      |     |     | 2.3  |    |
| 1420671_x_at | membrane-spanning 4-domains, subfamily A, member 4C                     | Ms4a4c      |     |     | 3.8  |    |
| 1450291_s_at | membrane-spanning 4-domains, subfamily A, member 4C                     | Ms4a4c      |     |     | 5.0  |    |
| 1418826_at   | membrane-spanning 4-domains, subfamily A, member 6B                     | Ms4a6b      |     |     | 2.3  |    |
| 1419599_s_at | membrane-spanning 4-domains, subfamily A, member 6D                     | Ms4a6d      |     |     | 18.9 |    |
| 1429060_at   | metastasis associated lung adenocarcinoma transcript 1                  | Malat1      |     |     | 5.2  |    |
| 1438403_s_at | metastasis associated lung adenocarcinoma transcript 1                  | Malat1      |     |     | 2.5  |    |
| 1452378_at   | metastasis associated lung adenocarcinoma transcript 1                  | Malat1      |     |     | 4.1  |    |
| 1424356_a_at | meteorin, glial cell differentiation regulator-like                     | Metrn1      |     |     | 3.1  |    |
| 1438538_at   | methyl CpG binding protein 2                                            | Mecp2       |     |     | 4.2  |    |

| Probeset ID  | Gene Title                                                                 | Gene Symbol       | 8mo | 60d | 21d  | 6d |
|--------------|----------------------------------------------------------------------------|-------------------|-----|-----|------|----|
| 1455529_at   | mex3 homolog A (C. elegans)                                                | Mex3a             |     |     | 2.1  |    |
| 1434221_at   | microtubule associated monooxygenase, calponin and LIM domain containing 3 | Mical3            |     |     | 3.1  |    |
| 1439585_at   | midasin homolog (yeast)                                                    | Mdn1              |     |     | 4.1  |    |
| 1438239_at   | midline 1                                                                  | Mid1              |     |     | 2.4  |    |
| 1430969_at   | mitochondrial carrier homolog 2 (C. elegans)                               | Mtch2             |     |     | 2.4  |    |
| 1438842_at   | mitochondrial carrier homolog 2 (C. elegans)                               | Mtch2             |     |     | 2.6  |    |
| 1439210_at   | mitochondrial ribosomal protein S9                                         | Mrps9             |     |     | 3.1  |    |
| 1429784_at   | Mitogen-activated protein kinase 1 interacting protein 1-like              | Mapk1ip11         |     |     | 2.3  |    |
| 1450973_s_at | mitogen-activated protein kinase binding protein 1                         | Mapkbp1           |     |     | 2.1  |    |
| 1423403_at   | mitogen-activated protein kinase binding protein 1                         | Mapkbp1           |     |     | 2.2  |    |
| 1421340_at   | mitogen-activated protein kinase kinase kinase 5                           | Map3k5            |     |     | 3.1  |    |
| 1439830_at   | mitogen-activated protein kinase kinase kinase 5                           | Map3k5            |     |     | 3.3  |    |
| 1450244_a_at | mitogen-activated protein kinase kinase kinase 2                           | Map4k2            |     |     | 2.1  |    |
| 1417967_at   | MMS19 (MET18 S. cerevisiae)                                                | Mms19             |     |     | 2.1  |    |
| 1421814_at   | moesin                                                                     | Msn               |     |     | 3.0  |    |
| 1435645_at   | monocyte to macrophage differentiation-associated                          | LOC676546 /// Mmd |     |     | 2.5  |    |
| 1452781_a_at | Mpv17 transgene, kidney disease mutant                                     | Gtf3c2 /// Mpv17  |     |     | 2.2  |    |
| 1416672_s_at | mucolipin 1                                                                | Mcoln1            |     |     | 2.2  |    |
| 1431705_a_at | mucolipin 2                                                                | Mcoln2            |     |     | 2.6  |    |
| 1418664_at   | multiple PDZ domain protein                                                | Mpdz              |     |     | 2.1  |    |
| 1439554_at   | Mus musculus, clone IMAGE:4007547, mRNA                                    | ---               |     |     | 5.8  |    |
| 1436818_a_at | Musashi homolog 2 (Drosophila)                                             | Msi2              |     |     | 2.8  |    |
| 1448602_at   | muscle glycogen phosphorylase                                              | Pygm              |     |     | 3.7  |    |
| 1458919_at   | muskelin 1, intracellular mediator containing kelch motifs                 | Mkn1              |     |     | 4.8  |    |
| 1434274_at   | MYC binding protein 2                                                      | Mycbp2            |     |     | 2.1  |    |
| 1447150_at   | MYC binding protein 2                                                      | Mycbp2            |     |     | 5.1  |    |
| 1428167_a_at | myelin protein zero-like 1                                                 | Mpzl1             |     |     | 2.3  |    |
| 1433811_at   | myeloid/lymphoid (trithorax homolog, Drosophila); tran                     | Mllt6             |     |     | 2.6  |    |
| 1442070_at   | myeloid/lymphoid (trithorax homolog, Drosophila); tran                     | Mllt10            |     |     | 13.5 |    |
| 1452377_at   | myeloid/lymphoid or mixed-lineage leukemia 1                               | Mll1              |     |     | 2.5  |    |
| 1457193_at   | myeloid/lymphoid or mixed-lineage leukemia 3                               | Mll3              |     |     | 2.3  |    |
| 1434178_at   | myeloid/lymphoid or mixed-lineage leukemia 3                               | Mll3              |     |     | 2.7  |    |
| 1423321_at   | myeloid-associated differentiation marker                                  | Myadm             |     |     | 2.1  |    |
| 1439389_s_at | myeloid-associated differentiation marker                                  | Myadm             |     |     | 2.3  |    |
| 1419754_at   | myosin Va                                                                  | Myo5a             |     |     | 2.1  |    |
| 1421615_at   | myosin XV                                                                  | Myo15             |     |     | 3.0  |    |
| 1427025_at   | myotubularin related protein 7                                             | Mttr7             |     |     | 2.6  |    |
| 1419676_at   | myxovirus (influenza virus) resistance 2                                   | Mx2               |     |     | 2.3  |    |
| 1416056_a_at | NADH dehydrogenase (ubiquinone) 1 beta subcomplex, 11                      | Ndufb11           |     |     | 2.2  |    |
| 1455911_x_at | NADH dehydrogenase (ubiquinone) 1 beta subcomplex, 11                      | Ndufb11           |     |     | 2.1  |    |
| 1416057_at   | NADH dehydrogenase (ubiquinone) 1 beta subcomplex, 11                      | Ndufb11           |     |     | 2.0  |    |
| 1427191_at   | natriuretic peptide receptor 2                                             | Npr2              |     |     | 3.2  |    |
| 1437660_at   | natural killer tumor recognition sequence                                  | Nktr              |     |     | 4.2  |    |
| 1428787_at   | NCK associated protein 1 like                                              | Nckap11           |     |     | 2.0  |    |
| 1435355_at   | nebulin                                                                    | Neb               |     |     | 2.9  |    |
| 1437853_x_at | necdin                                                                     | Ndn               |     |     | 2.6  |    |

| Probeset ID  | Gene Title                                                                      | Gene Symbol | 8mo | 60d | 21d  | 6d |
|--------------|---------------------------------------------------------------------------------|-------------|-----|-----|------|----|
| 1455792_x_at | necdin                                                                          | Ndn         |     |     | 2.5  |    |
| 1435383_x_at | necdin                                                                          | Ndn         |     |     | 2.6  |    |
| 1435382_at   | necdin                                                                          | Ndn         |     |     | 2.7  |    |
| 1441444_at   | Neurobeachin like 1                                                             | Nbeal1      |     |     | 2.0  |    |
| 1452525_a_at | neurofibromatosis 1                                                             | Nf1         |     |     | 2.1  |    |
| 1441353_at   | neuron navigator 2                                                              | Nav2        |     |     | 2.1  |    |
| 1444780_at   | neuron navigator 2                                                              | Nav2        |     |     | 3.3  |    |
| 1448561_at   | neutrophil cytosolic factor 2                                                   | Ncf2        |     |     | 5.1  |    |
| 1418465_at   | neutrophil cytosolic factor 4                                                   | Ncf4        |     |     | 2.7  |    |
| 1422952_at   | Ng23 protein                                                                    | Ng23        |     |     | 2.7  |    |
| 1438592_at   | NIMA (never in mitosis gene a)-related expressed kinase 1                       | Nek1        |     |     | 8.2  |    |
| 1442103_at   | Nipped-B homolog (Drosophila)                                                   | Nipbl       |     |     | 6.2  |    |
| 1433758_at   | nischarin                                                                       | Nisch       |     |     | 2.6  |    |
| 1425412_at   | NLR family, pyrin domain containing 3                                           | Nlrp3       |     |     | 2.4  |    |
| 1450000_at   | NLR family, pyrin domain containing 4C                                          | Nlrp4c      |     |     | 2.6  |    |
| 1436794_at   | NLR family, pyrin domain containing 4F                                          | Nlrp4f      |     |     | 5.2  |    |
| 1438818_at   | NMD3 homolog (S. cerevisiae)                                                    | Nmd3        |     |     | 4.4  |    |
| 1448154_at   | N-myc downstream regulated gene 2                                               | Ndrp2       |     |     | 2.5  |    |
| 1444387_at   | N-myristoyltransferase 2                                                        | Nmt2        |     |     | 3.1  |    |
| 1431239_at   | non-POU-domain-containing, octamer binding protein                              | Nono        |     |     | 2.1  |    |
| 1423920_at   | non-SMC condensin I complex, subunit H                                          | Ncaph       |     |     | 2.1  |    |
| 1418634_at   | Notch gene homolog 1 (Drosophila)                                               | Notch1      |     |     | 2.1  |    |
| 1455556_at   | Notch gene homolog 2 (Drosophila)                                               | Notch2      |     |     | 2.0  |    |
| 1451821_a_at | nuclear antigen Sp100                                                           | Sp100       |     |     | 2.3  |    |
| 1457113_at   | nuclear autoantigenic sperm protein (histone-binding)                           | Nasp        |     |     | 3.3  |    |
| 1457404_at   | Nuclear factor of kappa light polypeptide gene enhancer in B-cells inhibitor, z | Nfkbiz      |     |     | 3.5  |    |
| 1457117_at   | nuclear factor, erythroid derived 2, like 2                                     | Nfe2l2      |     |     | 2.3  |    |
| 1448893_at   | nuclear receptor co-repressor 2                                                 | Ncor2       |     |     | 2.7  |    |
| 1454295_at   | nuclear receptor interacting protein 1                                          | Nrip1       |     |     | 2.8  |    |
| 1460647_a_at | nuclear receptor subfamily 2, group F, member 6                                 | Nr2f6       |     |     | 2.5  |    |
| 1435088_at   | nuclear receptor-binding SET-domain protein 1                                   | Nsd1        |     |     | 2.5  |    |
| 1456916_at   | Nuclear receptor-binding SET-domain protein 1                                   | Nsd1        |     |     | 3.3  |    |
| 1424323_at   | nucleolar complex associated 2 homolog (S. cerevisiae)                          | Noc2l       |     |     | 2.6  |    |
| 1436136_at   | nucleolar complex associated 2 homolog (S. cerevisiae)                          | Noc2l       |     |     | 4.7  |    |
| 1441689_at   | nucleoporin 153                                                                 | Nup153      |     |     | 5.9  |    |
| 1445136_at   | Nucleoporin 155                                                                 | Nup155      |     |     | 3.2  |    |
| 1444892_at   | nucleoporin 160                                                                 | Nup160      |     |     | 2.3  |    |
| 1449140_at   | NudC domain containing 2                                                        | Nudcd2      |     |     | 2.5  |    |
| 1418566_s_at | NudC domain containing 2                                                        | Nudcd2      |     |     | 2.6  |    |
| 1438284_at   | oculocerebrorenal syndrome of Lowe                                              | Ocrl        |     |     | 2.1  |    |
| 1457313_at   | oculocerebrorenal syndrome of Lowe                                              | Ocrl        |     |     | 2.7  |    |
| 1424855_at   | oleoyl-ACP hydrolase                                                            | Olah        |     |     | 4.4  |    |
| 1451510_s_at | oleoyl-ACP hydrolase                                                            | Olah        |     |     | 5.3  |    |
| 1438767_at   | oncostatin M                                                                    | Osm         |     |     | 10.4 |    |
| 1437252_at   | opposite strand transcription unit to Stag3                                     | Gats        |     |     | 2.1  |    |
| 1427172_at   | oral-facial-digital syndrome 1 gene homolog (human)                             | Ofd1        |     |     | 2.0  |    |

| Probeset ID  | Gene Title                                                                | Gene Symbol           | 8mo | 60d | 21d  | 6d |
|--------------|---------------------------------------------------------------------------|-----------------------|-----|-----|------|----|
| 1437601_at   | orthodenticle homolog 1 (Drosophila)                                      | Otx1                  |     |     | 3.1  |    |
| 1444592_at   | O-sialoglycoprotein endopeptidase                                         | Osgpep                |     |     | 3.1  |    |
| 1438724_at   | oxysterol binding protein-like 3                                          | Osbpl3                |     |     | 2.2  |    |
| 1428484_at   | oxysterol binding protein-like 3                                          | Osbpl3                |     |     | 3.7  |    |
| 1457809_at   | p300/CBP-associated factor /// predicted gene, EG330129                   | EG330129 /// Pcaf     |     |     | 3.4  |    |
| 1442204_at   | Pannexin 2                                                                | Panx2                 |     |     | 2.1  |    |
| 1446272_at   | PCTAIRE-motif protein kinase 2                                            | Pctk2                 |     |     | 3.2  |    |
| 1441238_at   | PDS5, regulator of cohesion maintenance, homolog A (S. cerevisiae)        | Pds5a                 |     |     | 4.1  |    |
| 1442731_at   | PDS5, regulator of cohesion maintenance, homolog A (S. cerevisiae)        | Pds5a                 |     |     | 5.4  |    |
| 1443618_at   | PDZ domain containing 2                                                   | Pdzd2                 |     |     | 2.5  |    |
| 1435457_at   | PDZ domain containing 4                                                   | Pdzd4                 |     |     | 4.2  |    |
| 1416846_a_at | PDZ domain containing RING finger 3                                       | Pdzrn3                |     |     | 2.6  |    |
| 1451328_at   | pecanex-like 3 (Drosophila)                                               | Pcnxl3                |     |     | 2.0  |    |
| 1453839_a_at | peptidase inhibitor 16                                                    | Pi16                  |     |     | 3.6  |    |
| 1422272_at   | per-hexamer repeat gene 4                                                 | Phxr4                 |     |     | 2.0  |    |
| 1417602_at   | period homolog 2 (Drosophila)                                             | Per2                  |     |     | 2.0  |    |
| 1442243_at   | period homolog 3 (Drosophila)                                             | Per3                  |     |     | 3.9  |    |
| 1417133_at   | peripheral myelin protein                                                 | Pmp22                 |     |     | 7.8  |    |
| 1434822_at   | periphilin 1                                                              | Pphln1                |     |     | 2.1  |    |
| 1440267_at   | peroxisome biogenesis factor 1                                            | Pex1                  |     |     | 2.1  |    |
| 1426381_at   | peroxisome proliferative activated receptor, gamma, coactivator-related 1 | Pprc1                 |     |     | 2.3  |    |
| 1423703_at   | peter pan homolog (Drosophila)                                            | Ppan                  |     |     | 2.0  |    |
| 1435601_at   | PH domain and leucine rich repeat protein phosphatase-like                | Phlpp1                |     |     | 2.1  |    |
| 1446642_at   | PHD finger protein 14                                                     | Phf14                 |     |     | 7.0  |    |
| 1452259_at   | PHD finger protein 20                                                     | Phf20                 |     |     | 2.0  |    |
| 1418203_at   | phorbol-12-myristate-13-acetate-induced protein 1                         | Pmaip1                |     |     | 2.4  |    |
| 1446968_at   | phosphatidylinositol binding clathrin assembly protein                    | Picalm                |     |     | 3.6  |    |
| 1446974_at   | phosphatidylinositol-3-phosphate/phosphatidylinositol 5-kinase, type III  | Pip5k3                |     |     | 2.0  |    |
| 1424954_a_at | phosphatidylinositol-4-phosphate 5-kinase, type 1 gamma                   | Pip5k1c               |     |     | 2.2  |    |
| 1419279_at   | phosphatidylinositol-5-phosphate 4-kinase, type II, alpha                 | Pip4k2a               |     |     | 3.2  |    |
| 1442700_at   | phosphodiesterase 4B, cAMP specific                                       | Pde4b                 |     |     | 3.0  |    |
| 1456413_at   | phosphodiesterase 4D interacting protein (myomegalin)                     | Pde4dip               |     |     | 4.4  |    |
| 1429831_at   | phosphoinositide-3-kinase adaptor protein 1                               | Pik3ap1               |     |     | 4.6  |    |
| 1456047_at   | phospholipase A2, group IVB (cytosolic)                                   | LOC433466 /// Pla2g4b |     |     | 2.5  |    |
| 1430700_a_at | phospholipase A2, group VII                                               | Pla2g7                |     |     | 3.2  |    |
| 1442963_at   | Phospholipase C, gamma 1                                                  | Plcg1                 |     |     | 2.5  |    |
| 1433678_at   | phospholipase D family, member 4                                          | Pld4                  |     |     | 2.9  |    |
| 1417963_at   | phospholipid transfer protein                                             | Pltp                  |     |     | 3.0  |    |
| 1434518_at   | phosphorylase kinase alpha 2                                              | Phka2                 |     |     | 2.0  |    |
| 1447564_x_at | piwi-like homolog 4 (Drosophila)                                          | Piwil4                |     |     | 3.0  |    |
| 1418471_at   | placental growth factor                                                   | Pgf                   |     |     | 2.2  |    |
| 1448995_at   | platelet factor 4                                                         | Pf4                   |     |     | 42.7 |    |
| 1449351_s_at | platelet-derived growth factor, C polypeptide                             | Pdgfc                 |     |     | 2.1  |    |
| 1419123_a_at | platelet-derived growth factor, C polypeptide                             | Pdgfc                 |     |     | 2.4  |    |
| 1417523_at   | pleckstrin                                                                | Plek                  |     |     | 3.9  |    |
| 1417965_at   | pleckstrin homology domain containing, family A                           | Plekha1               |     |     | 2.0  |    |

| Probeset ID  | Gene Title                                                               | Gene Symbol             | 8mo | 60d | 21d | 6d |
|--------------|--------------------------------------------------------------------------|-------------------------|-----|-----|-----|----|
| 1457491_at   | Pleckstrin homology domain containing, family A                          | Plekha1                 |     |     | 2.3 |    |
| 1418201_at   | pleckstrin homology domain containing, family G member 2                 | Plekhg2                 |     |     | 2.4 |    |
| 1452248_at   | pleckstrin homology domain containing, family G member 5                 | Plekhg5                 |     |     | 2.6 |    |
| 1429004_at   | pleckstrin homology domain interacting protein                           | Phip                    |     |     | 2.2 |    |
| 1438535_at   | pleckstrin homology domain interacting protein                           | Phip                    |     |     | 9.5 |    |
| 1452178_at   | plectin 1 /// similar to Plec1 protein                                   | LOC100046469 /// Plec1  |     |     | 2.2 |    |
| 1451564_at   | poly (ADP-ribose) polymerase family, member 14                           | Parp14                  |     |     | 2.3 |    |
| 1417800_at   | poly (ADP-ribose) polymerase family, member 2                            | Parp2                   |     |     | 2.1 |    |
| 1422850_at   | poly(A) binding protein, nuclear 1                                       | Pabpn1                  |     |     | 2.9 |    |
| 1460210_at   | polycystic kidney disease 1 homolog                                      | Pkd1                    |     |     | 3.6 |    |
| 1438004_at   | polymerase (DNA directed) sigma                                          | Pols                    |     |     | 2.2 |    |
| 1430328_at   | polymerase (RNA) III (DNA directed) polypeptide F                        | Polr3f                  |     |     | 3.9 |    |
| 1441239_at   | potassium channel tetramerisation domain containing 18                   | Kctd18                  |     |     | 3.2 |    |
| 1416324_s_at | potassium channel tetramerisation domain containing 20                   | Kctd20                  |     |     | 2.2 |    |
| 1416323_at   | potassium channel tetramerisation domain containing 20                   | Kctd20                  |     |     | 2.3 |    |
| 1423950_at   | potassium voltage-gated channel, shaker-related subfamily, beta member 3 | Kcnab3                  |     |     | 4.2 |    |
| 1460038_at   | POU domain, class 3, transcription factor 1                              | LOC100045707 /// Pou3f1 |     |     | 2.6 |    |
| 1431238_at   | PQ loop repeat containing 1                                              | Pqlc1                   |     |     | 2.0 |    |
| 1442740_at   | PR domain containing 5                                                   | Prdm5                   |     |     | 2.5 |    |
| 1428647_at   | pre B-cell leukemia transcription factor 1                               | LOC676870 /// Pbx1      |     |     | 2.0 |    |
| 1418893_at   | pre B-cell leukemia transcription factor 2                               | Pbx2                    |     |     | 2.6 |    |
| 1449261_at   | pre B-cell leukemia transcription factor 2                               | Pbx2                    |     |     | 3.3 |    |
| 1418894_s_at | pre B-cell leukemia transcription factor 2                               | Pbx2                    |     |     | 3.6 |    |
| 1439560_x_at | predicted gene, EG432995                                                 | EG432995                |     |     | 3.5 |    |
| 1442536_at   | predicted gene, EG619719                                                 | EG619719                |     |     | 3.7 |    |
| 1444993_at   | predicted gene, EG664949                                                 | EG664949                |     |     | 2.3 |    |
| 1443858_at   | Predicted gene, EG667823                                                 | EG667823                |     |     | 2.4 |    |
| 1438050_x_at | predicted gene, EG668525                                                 | EG668525                |     |     | 4.5 |    |
| 1435740_at   | predicted gene, ENSMUSG00000072684                                       | ENSMUSG00000072684      |     |     | 2.3 |    |
| 1458701_at   | preimplantation protein 4                                                | Prei4                   |     |     | 3.2 |    |
| 1429639_at   | preimplantation protein 4                                                | Prei4                   |     |     | 5.6 |    |
| 1452249_at   | prickle like 1 (Drosophila)                                              | Prickle1                |     |     | 4.4 |    |
| 1415901_at   | procollagen-lysine, 2-oxoglutarate 5-dioxygenase 3                       | Plod3                   |     |     | 2.4 |    |
| 1428688_at   | programmed cell death protein 11                                         | Pdcd11                  |     |     | 2.2 |    |
| 1421410_a_at | proline-serine-threonine phosphatase-interacting protein 2               | Pstpip2                 |     |     | 2.9 |    |
| 1444419_at   | prolylcarboxypeptidase (angiotensinase C)                                | LOC100048394 /// Prcp   |     |     | 2.4 |    |
| 1424208_at   | prostaglandin E receptor 4 (subtype EP4)                                 | Ptger4                  |     |     | 2.6 |    |
| 1434891_at   | prostaglandin F2 receptor negative regulator                             | Ptgfrn                  |     |     | 2.7 |    |
| 1447122_at   | Proteasome (prosome, macropain) 26S subunit, non-ATPase, 1               | Psm1                    |     |     | 6.1 |    |
| 1417056_at   | proteasome (prosome, macropain) 28 subunit, alpha                        | Psme1                   |     |     | 2.1 |    |
| 1446464_at   | Proteasome (prosome, macropain) activator subunit 4                      | Psme4                   |     |     | 5.5 |    |
| 1441707_at   | Proteasome (prosome, macropain) subunit, alpha type 3                    | Psma3                   |     |     | 2.2 |    |
| 1450696_at   | proteasome (prosome, macropain) subunit, beta type 9                     | Psm9                    |     |     | 2.4 |    |
| 1448379_at   | protection of telomeres 1A                                               | Pot1a                   |     |     | 2.8 |    |
| 1420664_s_at | protein C receptor, endothelial                                          | Procr                   |     |     | 2.3 |    |
| 1446448_at   | protein inhibitor of activated STAT 1                                    | Pias1                   |     |     | 2.5 |    |

| Probeset ID  | Gene Title                                                              | Gene Symbol              | 8mo | 60d | 21d  | 6d |
|--------------|-------------------------------------------------------------------------|--------------------------|-----|-----|------|----|
| 1428230_at   | protein kinase D3                                                       | Prkd3                    |     |     | 2.7  |    |
| 1457197_at   | protein kinase, cAMP dependent, catalytic, beta                         | Prkacb                   |     |     | 6.1  |    |
| 1451576_at   | protein kinase, DNA activated, catalytic polypeptide                    | Prkdc                    |     |     | 2.5  |    |
| 1429500_at   | protein phosphatase 1A, magnesium dependent, alpha isoform              | Ppm1a                    |     |     | 2.3  |    |
| 1423911_at   | protein phosphatase 2, regulatory subunit B (B56), alpha isoform        | LOC100046393 /// Ppp2r5a |     |     | 2.2  |    |
| 1453298_at   | protein tyrosine phosphatase, non-receptor type 21                      | Ptpn21                   |     |     | 4.1  |    |
| 1422124_a_at | protein tyrosine phosphatase, receptor type, C                          | Ptprc                    |     |     | 7.8  |    |
| 1420843_at   | protein tyrosine phosphatase, receptor type, F                          | Ptprf                    |     |     | 3.4  |    |
| 1428577_at   | protein tyrosine phosphatase, receptor type, f polypeptide, interacting | Ppfia4                   |     |     | 4.2  |    |
| 1455030_at   | protein tyrosine phosphatase, receptor type, J                          | Ptprij                   |     |     | 2.6  |    |
| 1447825_x_at | protocadherin 8                                                         | Pcdh8                    |     |     | 2.0  |    |
| 1438103_at   | protocadherin gamma subfamily C, 4                                      | Pcdhgc4                  |     |     | 2.1  |    |
| 1433104_at   | pseudouridine synthase 3                                                | Pus3                     |     |     | 2.3  |    |
| 1428800_a_at | pseudouridylate synthase 7 homolog (S. cerevisiae)-like                 | Pus7l                    |     |     | 2.4  |    |
| 1419853_a_at | purinergic receptor P2X, ligand-gated ion channel, 7                    | P2rx7                    |     |     | 4.5  |    |
| 1452913_at   | Purkinje cell protein 4-like 1                                          | Pcp4l1                   |     |     | 2.7  |    |
| 1418560_at   | pyruvate dehydrogenase E1 alpha 1                                       | Pdha1                    |     |     | 2.6  |    |
| 1423748_at   | pyruvate dehydrogenase kinase, isoenzyme 1                              | Pdk1                     |     |     | 6.0  |    |
| 1435836_at   | pyruvate dehydrogenase kinase, isoenzyme 1                              | Pdk1                     |     |     | 4.5  |    |
| 1423747_a_at | pyruvate dehydrogenase kinase, isoenzyme 1                              | Pdk1                     |     |     | 5.4  |    |
| 1417308_at   | pyruvate kinase, muscle                                                 | Pkm2                     |     |     | 2.3  |    |
| 1457336_at   | R3H domain 1 (binds single-stranded nucleic acids)                      | R3hdm1                   |     |     | 4.0  |    |
| 1434156_at   | RAB11 family interacting protein 4 (class II)                           | Rab11fip4                |     |     | 2.2  |    |
| 1443954_at   | RAD18 homolog (S. cerevisiae)                                           | Rad18                    |     |     | 3.2  |    |
| 1421008_at   | radical S-adenosyl methionine domain containing 2                       | Rsad2                    |     |     | 12.9 |    |
| 1450690_at   | RAN binding protein 2                                                   | Ranbp2                   |     |     | 2.1  |    |
| 1445883_at   | RAN binding protein 2                                                   | Ranbp2                   |     |     | 7.3  |    |
| 1440104_at   | RAN binding protein 2                                                   | Ranbp2                   |     |     | 7.7  |    |
| 1442775_at   | RAN GTPase activating protein 1                                         | Rangap1                  |     |     | 4.2  |    |
| 1436325_at   | RAR-related orphan receptor alpha                                       | Rora                     |     |     | 2.3  |    |
| 1448546_at   | Ras association (RalGDS/AF-6) domain family member 3                    | Rassf3                   |     |     | 3.2  |    |
| 1451516_at   | Ras homolog enriched in brain like 1                                    | Rheb1                    |     |     | 2.8  |    |
| 1447818_x_at | Ras homolog enriched in brain like 1                                    | Rheb1                    |     |     | 3.0  |    |
| 1429444_at   | RAS-like, family 11, member A                                           | Rasl11a                  |     |     | 2.5  |    |
| 1455323_at   | RB-associated KRAB repressor                                            | Rbak                     |     |     | 2.1  |    |
| 1428227_at   | RE1-silencing transcription factor                                      | Rest                     |     |     | 2.2  |    |
| 1425565_at   | RE1-silencing transcription factor                                      | Rest                     |     |     | 2.4  |    |
| 1418580_at   | receptor transporter protein 4                                          | Rtp4                     |     |     | 2.2  |    |
| 1418487_at   | receptor-interacting serine-threonine kinase 4                          | Ripk4                    |     |     | 2.2  |    |
| 1418488_s_at | receptor-interacting serine-threonine kinase 4                          | Ripk4                    |     |     | 2.4  |    |
| 1446606_at   | region containing RIKEN cDNA 1700028E10 gene                            | LOC625175                |     |     | 3.3  |    |
| 1434027_at   | regulator of calcineurin 3                                              | Rcan3                    |     |     | 3.9  |    |
| 1436059_at   | regulatory factor X, 1 (influences HLA class II expression)             | Rfx1                     |     |     | 2.2  |    |
| 1439724_at   | resistance to inhibitors of cholinesterase 8 homolog B (C. elegans)     | Ric8b                    |     |     | 2.1  |    |
| 1421359_at   | ret proto-oncogene                                                      | Ret                      |     |     | 6.2  |    |
| 1433906_at   | retinaldehyde binding protein 1-like 1                                  | Rlbp11                   |     |     | 4.9  |    |

| Probeset ID  | Gene Title                                           | Gene Symbol               | 8mo | 60d | 21d | 6d |
|--------------|------------------------------------------------------|---------------------------|-----|-----|-----|----|
| 1454773_at   | retinoid X receptor alpha                            | Rxra                      |     |     | 2.8 |    |
| 1428369_s_at | Rho GTPase activating protein 21                     | Arhgap21                  |     |     | 2.7 |    |
| 1444128_at   | Rho GTPase activating protein 26                     | Arhgap26                  |     |     | 2.5 |    |
| 1457410_at   | Rho GTPase activating protein 5                      | Arhgap5                   |     |     | 4.1 |    |
| 1457172_at   | Rho guanine nucleotide exchange factor (GEF) 15      | Arhgef15                  |     |     | 6.1 |    |
| 1435941_at   | rhomboid, veinlet-like 3 (Drosophila)                | Rhbdl3                    |     |     | 3.1 |    |
| 1454639_x_at | ribosomal protein L41 /// RIKEN cDNA 2210411K19 gene | 2210411K19Rik /// Rpl41   |     |     | 3.0 |    |
| 1415913_at   | ribosomal protein S13 /// predicted gene, EG625298   | EG625298 /// LOC100039924 |     |     | 2.1 |    |
| 1416276_a_at | ribosomal protein S4, X-linked                       | Rps4x                     |     |     | 2.1 |    |
| 1426123_a_at | ribosome binding protein 1                           | Rrbp1                     |     |     | 2.6 |    |
| 1449221_a_at | ribosome binding protein 1                           | Rrbp1                     |     |     | 3.3 |    |
| 1428679_s_at | RIKEN cDNA 0610010K14 gene                           | 0610010K14Rik             |     |     | 2.8 |    |
| 1429252_at   | RIKEN cDNA 0610010K14 gene                           | 0610010K14Rik             |     |     | 2.8 |    |
| 1438254_at   | RIKEN cDNA 1110007A13 gene                           | 1110007A13Rik             |     |     | 2.1 |    |
| 1451302_at   | RIKEN cDNA 1110012L19 gene                           | 1110012L19Rik             |     |     | 2.1 |    |
| 1436747_at   | RIKEN cDNA 1110014K08 gene                           | 1110014K08Rik             |     |     | 3.1 |    |
| 1455294_at   | RIKEN cDNA 1110029L17 gene                           | 1110029L17Rik             |     |     | 2.7 |    |
| 1439543_at   | RIKEN cDNA 1110064A23 gene                           | 1110064A23Rik             |     |     | 5.6 |    |
| 1429219_at   | RIKEN cDNA 1200009F10 gene                           | 1200009F10Rik             |     |     | 2.7 |    |
| 1423655_a_at | RIKEN cDNA 1500010J02 gene                           | 1500010J02Rik             |     |     | 2.2 |    |
| 1447537_at   | RIKEN cDNA 1500032P08 gene                           | 1500032P08Rik             |     |     | 3.3 |    |
| 1439014_at   | RIKEN cDNA 1600021P15 gene                           | 1600021P15Rik             |     |     | 2.3 |    |
| 1430199_at   | RIKEN cDNA 1700007E05 gene                           | 1700007E05Rik             |     |     | 4.2 |    |
| 1453168_at   | RIKEN cDNA 1700029J07 gene                           | 1700029J07Rik             |     |     | 2.1 |    |
| 1430499_at   | RIKEN cDNA 1700058M13 gene                           | 1700058M13Rik             |     |     | 2.2 |    |
| 1447569_at   | RIKEN cDNA 1700081L11 gene                           | 1700081L11Rik             |     |     | 2.0 |    |
| 1441400_at   | RIKEN cDNA 1810029B16 gene                           | 1810029B16Rik             |     |     | 2.1 |    |
| 1433530_at   | RIKEN cDNA 2210411K19 gene                           | 2210411K19Rik             |     |     | 3.5 |    |
| 1452159_at   | RIKEN cDNA 2310001A20 gene                           | 2310001A20Rik             |     |     | 2.1 |    |
| 1425087_at   | RIKEN cDNA 2310003F16 gene                           | 2310003F16Rik             |     |     | 2.0 |    |
| 1428383_a_at | RIKEN cDNA 2310021P13 gene                           | 2310021P13Rik             |     |     | 2.7 |    |
| 1436001_at   | RIKEN cDNA 2310028O11 gene                           | 2310028O11Rik             |     |     | 2.4 |    |
| 1445881_at   | RIKEN cDNA 2310035P21 gene                           | 2310035P21Rik             |     |     | 6.5 |    |
| 1455389_s_at | RIKEN cDNA 2310051F07 gene                           | 2310051F07Rik             |     |     | 3.9 |    |
| 1443314_at   | RIKEN cDNA 2410042D21 gene                           | 2410042D21Rik             |     |     | 2.9 |    |
| 1444220_at   | RIKEN cDNA 2410089E03 gene                           | 2410089E03Rik             |     |     | 3.3 |    |
| 1429967_at   | RIKEN cDNA 2600002B07 gene                           | 2600002B07Rik             |     |     | 2.8 |    |
| 1438591_at   | RIKEN cDNA 2610019A05 gene                           | 2610019A05Rik             |     |     | 3.1 |    |
| 1442897_at   | RIKEN cDNA 2610024E20 gene                           | 2610024E20Rik             |     |     | 2.1 |    |
| 1430264_at   | RIKEN cDNA 2610030P05 gene                           | 2610030P05Rik             |     |     | 5.6 |    |
| 1457593_at   | RIKEN cDNA 2610202C22 gene                           | 2610202C22Rik             |     |     | 4.0 |    |
| 1455160_at   | RIKEN cDNA 2610203C20 gene                           | 2610203C20Rik             |     |     | 2.0 |    |
| 1428604_at   | RIKEN cDNA 2610305D13 gene                           | 2610305D13Rik             |     |     | 3.7 |    |
| 1433312_at   | RIKEN cDNA 2700057C20 gene                           | 2700057C20Rik             |     |     | 3.2 |    |
| 1436349_at   | RIKEN cDNA 2700094K13 gene                           | 2700094K13Rik             |     |     | 2.0 |    |
| 1441087_at   | RIKEN cDNA 2810011L19 gene                           | 2810011L19Rik             |     |     | 2.3 |    |

| Probeset ID  | Gene Title                       | Gene Symbol                    | 8mo | 60d | 21d  | 6d |
|--------------|----------------------------------|--------------------------------|-----|-----|------|----|
| 1430195_at   | RIKEN cDNA 2810043O03 gene       | 2810043O03Rik                  |     |     | 6.9  |    |
| 1429821_at   | RIKEN cDNA 2810046L04 gene       | 2810046L04Rik                  |     |     | 3.5  |    |
| 1432924_at   | RIKEN cDNA 2810404I24 gene       | 2810404I24Rik                  |     |     | 6.3  |    |
| 1454521_at   | RIKEN cDNA 2810421E14 gene       | 2810421E14Rik                  |     |     | 3.8  |    |
| 1430010_at   | RIKEN cDNA 2810465G24 gene       | 2810465G24Rik                  |     |     | 2.0  |    |
| 1452989_at   | RIKEN cDNA 2900009J20 gene       | 2900009J20Rik                  |     |     | 4.6  |    |
| 1454384_at   | RIKEN cDNA 2900057C01 gene       | 2900057C01Rik                  |     |     | 4.6  |    |
| 1429857_at   | RIKEN cDNA 2900092D14 gene       | 2900092D14Rik                  |     |     | 2.0  |    |
| 1430816_at   | RIKEN cDNA 3110003A22 gene       | 3110003A22Rik                  |     |     | 2.4  |    |
| 1429331_at   | RIKEN cDNA 4632427E13 gene       | 4632427E13Rik                  |     |     | 2.5  |    |
| 1446425_at   | RIKEN cDNA 4732418C07 gene       | 4732418C07Rik                  |     |     | 4.4  |    |
| 1430220_at   | RIKEN cDNA 4833420G17 gene       | 4833420G17Rik                  |     |     | 2.4  |    |
| 1456906_at   | RIKEN cDNA 4833432P19 gene, mRNA | ---                            |     |     | 2.4  |    |
| 1441753_at   | RIKEN cDNA 4921505C17 gene       | 4921505C17Rik                  |     |     | 3.0  |    |
| 1432694_at   | RIKEN cDNA 4921527H02 gene       | 4921527H02Rik                  |     |     | 2.3  |    |
| 1429694_at   | RIKEN cDNA 4930402H24 gene       | 4930402H24Rik                  |     |     | 3.3  |    |
| 1454216_at   | RIKEN cDNA 4930408F14 gene       | 4930408F14Rik                  |     |     | 2.2  |    |
| 1457754_at   | RIKEN cDNA 4930430F08 gene       | 4930430F08Rik                  |     |     | 2.3  |    |
| 1431924_at   | RIKEN cDNA 4930432N10 gene       | 4930432N10Rik                  |     |     | 2.5  |    |
| 1419151_at   | RIKEN cDNA 4930449I24 gene       | 4930449I24Rik /// LOC100041548 |     |     | 4.1  |    |
| 1431870_at   | RIKEN cDNA 4930463O16 gene       | 4930463O16Rik                  |     |     | 2.4  |    |
| 1439969_at   | RIKEN cDNA 4930500O05 gene       | 4930500O05Rik                  |     |     | 2.1  |    |
| 1439134_s_at | RIKEN cDNA 4930524O07 gene       | 4930524O07Rik                  |     |     | 2.1  |    |
| 1439133_at   | RIKEN cDNA 4930524O07 gene       | 4930524O07Rik                  |     |     | 2.3  |    |
| 1431648_at   | RIKEN cDNA 4930528F23 gene       | 4930528F23Rik                  |     |     | 2.8  |    |
| 1441039_at   | RIKEN cDNA 4930532J02 gene       | 4930532J02Rik                  |     |     | 2.4  |    |
| 1433276_at   | RIKEN cDNA 4930556A12 gene       | 4930556A12Rik                  |     |     | 4.2  |    |
| 1427016_at   | RIKEN cDNA 4932438A13 gene       | 4932438A13Rik                  |     |     | 2.1  |    |
| 1444660_at   | RIKEN cDNA 4932438A13 gene       | 4932438A13Rik                  |     |     | 5.0  |    |
| 1440851_at   | RIKEN cDNA 4933407N01 gene       | 4933407N01Rik                  |     |     | 4.2  |    |
| 1432642_at   | RIKEN cDNA 4933411E06 gene       | 4933411E06Rik                  |     |     | 5.2  |    |
| 1429811_at   | RIKEN cDNA 4933424B01 gene       | 4933424B01Rik                  |     |     | 2.0  |    |
| 1445223_at   | RIKEN cDNA 4933430H15 gene       | 4933430H15Rik                  |     |     | 2.2  |    |
| 1430441_at   | RIKEN cDNA 4933438K21 gene       | 4933438K21Rik                  |     |     | 3.3  |    |
| 1438541_at   | RIKEN cDNA 4933439F18 gene       | 4933439F18Rik                  |     |     | 3.3  |    |
| 1428694_at   | RIKEN cDNA 5033413D16 gene       | 5033413D16Rik                  |     |     | 3.6  |    |
| 1460361_at   | RIKEN cDNA 5033414D02 gene       | 5033414D02Rik                  |     |     | 2.1  |    |
| 1460500_at   | RIKEN cDNA 5033421C21 gene       | 5033421C21Rik                  |     |     | 11.2 |    |
| 1432946_at   | RIKEN cDNA 5230400M06 gene       | 5230400M06Rik                  |     |     | 4.1  |    |
| 1455553_at   | RIKEN cDNA 5330401P04 gene       | 5330401P04Rik                  |     |     | 2.4  |    |
| 1428419_at   | RIKEN cDNA 5430411K18 gene       | 5430411K18Rik                  |     |     | 2.1  |    |
| 1432850_at   | RIKEN cDNA 5430434G16 gene       | 5430434G16Rik                  |     |     | 3.4  |    |
| 1433174_a_at | RIKEN cDNA 5430440L12 gene       | 5430440L12Rik                  |     |     | 2.2  |    |
| 1452750_at   | RIKEN cDNA 5530601H04 gene       | 5530601H04Rik                  |     |     | 2.2  |    |
| 1453790_at   | RIKEN cDNA 5730403B10 gene       | 5730403B10Rik                  |     |     | 2.2  |    |
| 1432843_at   | RIKEN cDNA 5730405O12 gene       | 5730405O12Rik                  |     |     | 3.4  |    |

| Probeset ID  | Gene Title                 | Gene Symbol   | 8mo | 60d | 21d  | 6d |
|--------------|----------------------------|---------------|-----|-----|------|----|
| 1428220_at   | RIKEN cDNA 5730419I09 gene | 5730419I09Rik |     |     | 2.0  |    |
| 1444738_at   | RIKEN cDNA 5730419I09 gene | 5730419I09Rik |     |     | 7.3  |    |
| 1443226_at   | RIKEN cDNA 5730470L24 gene | 5730470L24Rik |     |     | 2.4  |    |
| 1457642_at   | RIKEN cDNA 5730507N06 gene | 5730507N06Rik |     |     | 2.5  |    |
| 1457913_at   | RIKEN cDNA 5730601F06 gene | 5730601F06Rik |     |     | 3.6  |    |
| 1420758_at   | RIKEN cDNA 5830411J07 gene | 5830411J07Rik |     |     | 4.2  |    |
| 1430379_at   | RIKEN cDNA 5830411K21 gene | 5830411K21Rik |     |     | 3.9  |    |
| 1436652_at   | RIKEN cDNA 5830418K08 gene | 5830418K08Rik |     |     | 2.3  |    |
| 1456296_at   | RIKEN cDNA 5830418K08 gene | 5830418K08Rik |     |     | 4.8  |    |
| 1430702_at   | RIKEN cDNA 5830427D03 gene | 5830427D03Rik |     |     | 5.1  |    |
| 1433624_at   | RIKEN cDNA 5830434P21 gene | 5830434P21Rik |     |     | 2.5  |    |
| 1429978_at   | RIKEN cDNA 5830467E07 gene | 5830467E07Rik |     |     | 5.8  |    |
| 1453658_at   | RIKEN cDNA 5830477G23 gene | 5830477G23Rik |     |     | 2.7  |    |
| 1430585_at   | RIKEN cDNA 5930436O19 gene | 5930436O19Rik |     |     | 7.2  |    |
| 1440163_at   | RIKEN cDNA 6030490B17 gene | 6030490B17Rik |     |     | 8.8  |    |
| 1437873_at   | RIKEN cDNA 6030490I01 gene | 6030490I01Rik |     |     | 2.8  |    |
| 1437753_at   | RIKEN cDNA 6230409E13 gene | 6230409E13Rik |     |     | 2.0  |    |
| 1426766_at   | RIKEN cDNA 6330403K07 gene | 6330403K07Rik |     |     | 4.3  |    |
| 1460555_at   | RIKEN cDNA 6330500D04 gene | 6330500D04Rik |     |     | 5.6  |    |
| 1441403_at   | RIKEN cDNA 6430501K19 gene | 6430501K19Rik |     |     | 3.0  |    |
| 1451456_at   | RIKEN cDNA 6430706D22 gene | 6430706D22Rik |     |     | 2.3  |    |
| 1429949_at   | RIKEN cDNA 6530415H11 gene | 6530415H11Rik |     |     | 2.5  |    |
| 1437798_at   | RIKEN cDNA 6720422M22 gene | 6720422M22Rik |     |     | 2.5  |    |
| 1456282_at   | RIKEN cDNA 6720457D02 gene | 6720457D02Rik |     |     | 2.8  |    |
| 1456896_at   | RIKEN cDNA 6720462K09 gene | 6720462K09Rik |     |     | 3.1  |    |
| 1436740_at   | RIKEN cDNA 6820431F20 gene | 6820431F20Rik |     |     | 3.7  |    |
| 1437717_x_at | RIKEN cDNA 6820431F20 gene | 6820431F20Rik |     |     | 4.3  |    |
| 1429882_at   | RIKEN cDNA 6820431F20 gene | 6820431F20Rik |     |     | 10.1 |    |
| 1458058_at   | RIKEN cDNA 7030407E18 gene | 7030407E18Rik |     |     | 11.4 |    |
| 1444797_at   | RIKEN cDNA 8030474K03 gene | 8030474K03Rik |     |     | 2.1  |    |
| 1431158_at   | RIKEN cDNA 8430406H22 gene | 8430406H22Rik |     |     | 2.2  |    |
| 1444646_at   | RIKEN cDNA 8430420F16 gene | 8430420F16Rik |     |     | 4.1  |    |
| 1430097_at   | RIKEN cDNA 8430436C05 gene | 8430436C05Rik |     |     | 2.7  |    |
| 1430942_at   | RIKEN cDNA 8430437O03 gene | 8430437O03Rik |     |     | 7.1  |    |
| 1440974_at   | RIKEN cDNA 9030203C11 gene | 9030203C11Rik |     |     | 3.4  |    |
| 1429846_at   | RIKEN cDNA 9030411K21 gene | 9030411K21Rik |     |     | 3.2  |    |
| 1433101_at   | RIKEN cDNA 9030419F21 gene | 9030419F21Rik |     |     | 3.9  |    |
| 1430191_at   | RIKEN cDNA 9130004J05 gene | 9130004J05Rik |     |     | 5.5  |    |
| 1438299_at   | RIKEN cDNA 9230108I15 gene | 9230108I15Rik |     |     | 2.2  |    |
| 1441114_at   | RIKEN cDNA 9330156P08 gene | 9330156P08Rik |     |     | 4.3  |    |
| 1430663_at   | RIKEN cDNA 9430037O13 gene | 9430037O13Rik |     |     | 3.6  |    |
| 1441779_at   | RIKEN cDNA 9530006C21 gene | 9530006C21Rik |     |     | 2.7  |    |
| 1459344_at   | RIKEN cDNA 9630019E01 gene | 9630019E01Rik |     |     | 3.6  |    |
| 1442427_at   | RIKEN cDNA 9630026M06 gene | 9630026M06Rik |     |     | 4.1  |    |
| 1447269_at   | RIKEN cDNA 9630031F12 gene | 9630031F12Rik |     |     | 6.7  |    |
| 1456758_at   | RIKEN cDNA 9930017N22 gene | 9930017N22Rik |     |     | 3.4  |    |

| Probeset ID  | Gene Title                 | Gene Symbol   | 8mo | 60d | 21d | 6d |
|--------------|----------------------------|---------------|-----|-----|-----|----|
| 1440671_at   | RIKEN cDNA A130012E19 gene | A130012E19Rik |     |     | 3.0 |    |
| 1437719_x_at | RIKEN cDNA A230046K03 gene | A230046K03Rik |     |     | 2.9 |    |
| 1439450_x_at | RIKEN cDNA A230046K03 gene | A230046K03Rik |     |     | 3.0 |    |
| 1456334_s_at | RIKEN cDNA A230106D06 gene | A230106D06Rik |     |     | 3.5 |    |
| 1457112_at   | RIKEN cDNA A230106N23 gene | A230106N23Rik |     |     | 2.5 |    |
| 1446797_at   | RIKEN cDNA A330075M08 gene | A330075M08Rik |     |     | 2.6 |    |
| 1434841_at   | RIKEN cDNA A430093A21 gene | A430093A21Rik |     |     | 2.3 |    |
| 1438895_at   | RIKEN cDNA A430102J17 gene | A430102J17Rik |     |     | 7.2 |    |
| 1432567_at   | RIKEN cDNA A430105D02 gene | A430105D02Rik |     |     | 4.1 |    |
| 1430774_at   | RIKEN cDNA A430106A12 gene | A430106A12Rik |     |     | 4.0 |    |
| 1438049_at   | RIKEN cDNA A430108E01 gene | A430108E01Rik |     |     | 3.8 |    |
| 1455461_at   | RIKEN cDNA A530017D24 gene | A530017D24Rik |     |     | 2.4 |    |
| 1436447_at   | RIKEN cDNA A630026N12 gene | A630026N12Rik |     |     | 2.7 |    |
| 1443950_at   | RIKEN cDNA A630042L21 gene | A630042L21Rik |     |     | 2.8 |    |
| 1443114_at   | RIKEN cDNA A730059M13 gene | A730059M13Rik |     |     | 6.1 |    |
| 1434292_at   | RIKEN cDNA A930034L06 gene | A930034L06Rik |     |     | 5.5 |    |
| 1435266_at   | RIKEN cDNA A930041I02 gene | A930041I02Rik |     |     | 2.0 |    |
| 1445081_at   | RIKEN cDNA A930041I02 gene | A930041I02Rik |     |     | 2.8 |    |
| 1438454_at   | RIKEN cDNA B430203M17 gene | B430203M17Rik |     |     | 3.7 |    |
| 1444119_at   | RIKEN cDNA B930006L02 gene | B930006L02Rik |     |     | 2.5 |    |
| 1458376_at   | RIKEN cDNA B930025B16 gene | B930025B16Rik |     |     | 2.4 |    |
| 1441656_at   | RIKEN cDNA B930068K11 gene | B930068K11Rik |     |     | 4.9 |    |
| 1432547_at   | RIKEN cDNA C030005H24 gene | C030005H24Rik |     |     | 3.1 |    |
| 1452351_at   | RIKEN cDNA C030027K23 gene | C030027K23Rik |     |     | 2.4 |    |
| 1444353_at   | RIKEN cDNA C030040A22 gene | C030040A22Rik |     |     | 2.7 |    |
| 1429264_at   | RIKEN cDNA C030044B11 gene | C030044B11Rik |     |     | 3.5 |    |
| 1457334_at   | RIKEN cDNA C130057M05 gene | C130057M05Rik |     |     | 3.8 |    |
| 1441632_at   | RIKEN cDNA C130079B09 gene | C130079B09Rik |     |     | 2.3 |    |
| 1435564_at   | RIKEN cDNA C230078M08 gene | C230078M08Rik |     |     | 2.4 |    |
| 1436709_at   | RIKEN cDNA C230096C10 gene | C230096C10Rik |     |     | 2.2 |    |
| 1457508_at   | RIKEN cDNA C430003N24 gene | C430003N24Rik |     |     | 5.5 |    |
| 1445312_at   | RIKEN cDNA C530043G21 gene | C530043G21Rik |     |     | 4.1 |    |
| 1440985_at   | RIKEN cDNA D130023J23 gene | D130023J23Rik |     |     | 3.3 |    |
| 1443068_at   | RIKEN cDNA D130084N16 gene | D130084N16Rik |     |     | 2.3 |    |
| 1442151_at   | RIKEN cDNA D230040A04 gene | D230040A04Rik |     |     | 6.1 |    |
| 1434301_at   | RIKEN cDNA D330050I23 gene | D330050I23Rik |     |     | 2.1 |    |
| 1455447_at   | RIKEN cDNA D430019H16 gene | D430019H16Rik |     |     | 5.2 |    |
| 1455134_at   | RIKEN cDNA D730040F13 gene | D730040F13Rik |     |     | 2.9 |    |
| 1426834_s_at | RIKEN cDNA D930015E06 gene | D930015E06Rik |     |     | 2.4 |    |
| 1440443_at   | RIKEN cDNA E030016H06 gene | E030016H06Rik |     |     | 3.2 |    |
| 1430386_at   | RIKEN cDNA E030024N20 gene | E030024N20Rik |     |     | 3.0 |    |
| 1444086_at   | RIKEN cDNA E030049G20 gene | E030049G20Rik |     |     | 2.4 |    |
| 1445717_at   | RIKEN cDNA E130108L08 gene | E130108L08Rik |     |     | 6.2 |    |
| 1439673_at   | RIKEN cDNA E230008O15 gene | E230008O15Rik |     |     | 4.1 |    |
| 1433798_a_at | RIKEN cDNA E330034G19 gene | E330034G19Rik |     |     | 2.4 |    |
| 1441187_at   | RIKEN cDNA E330037M01 gene | E330037M01Rik |     |     | 4.7 |    |

| Probeset ID  | Gene Title                                                  | Gene Symbol   | 8mo | 60d | 21d  | 6d |
|--------------|-------------------------------------------------------------|---------------|-----|-----|------|----|
| 1440072_at   | RIKEN cDNA E430022K19 gene                                  | E430022K19Rik |     |     | 3.4  |    |
| 1440342_at   | RIKEN cDNA G530011O06 gene                                  | G530011O06Rik |     |     | 4.6  |    |
| 1446444_at   | ring finger and CCCH-type zinc finger domains 2             | Rc3h2         |     |     | 4.1  |    |
| 1426925_at   | ring finger and CCCH-type zinc finger domains 2             | Rc3h2         |     |     | 5.7  |    |
| 1434207_at   | ring finger protein 169                                     | Rnf169        |     |     | 2.5  |    |
| 1425124_at   | ring finger protein 183                                     | Rnf183        |     |     | 3.7  |    |
| 1460018_at   | Ring finger protein 213                                     | Rnf213        |     |     | 3.6  |    |
| 1458507_at   | Ring finger protein 216                                     | Rnf216        |     |     | 2.9  |    |
| 1423740_a_at | RNA binding motif protein 10                                | Rbm10         |     |     | 2.5  |    |
| 1425522_at   | RNA binding motif protein 25                                | Rbm25         |     |     | 2.7  |    |
| 1437862_at   | RNA binding motif protein 25                                | Rbm25         |     |     | 4.0  |    |
| 1426419_at   | RNA binding motif protein 26                                | Rbm26         |     |     | 2.1  |    |
| 1454681_at   | RNA binding motif protein 35A                               | Rbm35a        |     |     | 3.6  |    |
| 1438420_at   | RNA binding motif protein 39                                | Rbm39         |     |     | 2.9  |    |
| 1439316_at   | RNA binding motif protein 39                                | Rbm39         |     |     | 6.1  |    |
| 1440223_at   | RNA binding motif protein 6                                 | Rbm6          |     |     | 5.0  |    |
| 1418247_s_at | RNA binding motif protein 9                                 | Rbm9          |     |     | 2.0  |    |
| 1452899_at   | RNA imprinted and accumulated in nucleus                    | Rian          |     |     | 5.2  |    |
| 1455893_at   | R-spondin 2 homolog (Xenopus laevis)                        | Rspo2         |     |     | 10.6 |    |
| 1434958_at   | sacsin                                                      | Sacs          |     |     | 2.1  |    |
| 1419730_at   | S-adenosylhomocysteine hydrolase-like 2                     | Ahcyl2        |     |     | 5.6  |    |
| 1445720_at   | SAFB-like, transcription modulator                          | Sltm          |     |     | 2.5  |    |
| 1456683_at   | SAFB-like, transcription modulator                          | Sltm          |     |     | 5.9  |    |
| 1437983_at   | sal-like 1 (Drosophila)                                     | Sall1         |     |     | 3.0  |    |
| 1424152_at   | sal-like 4 (Drosophila)                                     | Sall4         |     |     | 2.3  |    |
| 1434438_at   | SAM domain and HD domain, 1                                 | Samhd1        |     |     | 2.9  |    |
| 1418131_at   | SAM domain and HD domain, 1                                 | Samhd1        |     |     | 2.4  |    |
| 1420688_a_at | sarcoglycan, epsilon                                        | Sgce          |     |     | 2.4  |    |
| 1427987_at   | scaffold attachment factor B2                               | Safb2         |     |     | 2.3  |    |
| 1427988_s_at | scaffold attachment factor B2                               | Safb2         |     |     | 2.3  |    |
| 1427102_at   | schlafen 4                                                  | Slfn4         |     |     | 9.6  |    |
| 1451655_at   | schlafen 8                                                  | Slfn8         |     |     | 3.3  |    |
| 1443176_at   | Scm-like with four mbt domains 2                            | Sfmbt2        |     |     | 4.1  |    |
| 1455549_at   | SEC14 and spectrin domains 1                                | Sestd1        |     |     | 3.1  |    |
| 1428136_at   | secreted frizzled-related protein 1                         | Sfrp1         |     |     | 2.1  |    |
| 1448201_at   | secreted frizzled-related protein 2                         | Sfrp2         |     |     | 4.1  |    |
| 1451224_at   | secretory carrier membrane protein 5                        | Scamp5        |     |     | 4.3  |    |
| 1420824_at   | sema domain, immunoglobulin domain (Ig)                     | Sema4d        |     |     | 3.6  |    |
| 1433920_at   | sema domain, immunoglobulin domain (Ig)                     | Sema4c        |     |     | 3.9  |    |
| 1429233_at   | septin 11                                                   | Sept11        |     |     | 2.5  |    |
| 1429234_s_at | septin 11                                                   | Sept11        |     |     | 2.2  |    |
| 1422601_at   | serine (or cysteine) peptidase inhibitor, clade B, member 9 | Serpib9       |     |     | 2.6  |    |
| 1438688_at   | serine/arginine repetitive matrix 2                         | Srrm2         |     |     | 2.3  |    |
| 1430165_at   | serine/threonine kinase 17b (apoptosis-inducing)            | Stk17b        |     |     | 3.3  |    |
| 1426247_at   | serine/threonine kinase 24 (STE20 homolog, yeast)           | Stk24         |     |     | 2.0  |    |

| Probeset ID  | Gene Title                                                                       | Gene Symbol              | 8mo | 60d | 21d  | 6d |
|--------------|----------------------------------------------------------------------------------|--------------------------|-----|-----|------|----|
| 1418739_at   | serum/glucocorticoid regulated kinase 2                                          | Sgk2                     |     |     | 2.4  |    |
| 1433711_s_at | sestrin 1 /// similar to Sesn1 protein                                           | LOC100047324 /// Sesn1   |     |     | 2.0  |    |
| 1438931_s_at | sestrin 1 /// similar to Sesn1 protein                                           | LOC100047324 /// Sesn1   |     |     | 2.1  |    |
| 1460373_a_at | SET domain containing 4                                                          | Setd4                    |     |     | 2.3  |    |
| 1435405_at   | SET domain containing 4                                                          | Setd4                    |     |     | 4.6  |    |
| 1441573_at   | Sex comb on midleg homolog 1                                                     | Scmh1                    |     |     | 5.5  |    |
| 1435644_at   | SH3 and PX domains 2B                                                            | Sh3pxd2b                 |     |     | 2.5  |    |
| 1428107_at   | SH3-binding domain glutamic acid-rich protein like                               | Sh3bgrl                  |     |     | 2.0  |    |
| 1436997_x_at | SH3-binding domain glutamic acid-rich protein like                               | Sh3bgrl                  |     |     | 2.2  |    |
| 1423978_at   | SH3-binding kinase 1                                                             | Sbk1                     |     |     | 2.7  |    |
| 1426499_at   | SH3-domain GRB2-like endophilin B2                                               | Sh3glb2                  |     |     | 2.2  |    |
| 1437503_a_at | shisa homolog 5 ( <i>Xenopus laevis</i> )                                        | Shisa5                   |     |     | 2.8  |    |
| 1434222_at   | signal-induced proliferation-associated 1 like 1                                 | Sipa111                  |     |     | 2.3  |    |
| 1439755_at   | signal-induced proliferation-associated 1 like 1                                 | Sipa111                  |     |     | 4.8  |    |
| 1434261_at   | signal-induced proliferation-associated 1 like 2                                 | Sipa112                  |     |     | 2.4  |    |
| 1416985_at   | signal-regulatory protein alpha                                                  | Sirpa                    |     |     | 4.3  |    |
| 1437566_at   | similar to guanine nucleotide binding protein-like 2 (nucleolar)                 | LOC633966                |     |     | 2.3  |    |
| 1456635_at   | similar to SP140 nuclear body protein family member                              | LOC100039742             |     |     | 3.5  |    |
| 1441112_at   | similar to Zinc finger BED domain containing protein 4                           | LOC667118                |     |     | 3.0  |    |
| 1427917_s_at | single-stranded DNA binding protein 3                                            | Ssbp3                    |     |     | 2.5  |    |
| 1431896_at   | Six6 opposite strand transcript 1                                                | Six6os1                  |     |     | 3.4  |    |
| 1426373_at   | ski sarcoma viral oncogene homolog (avian)                                       | Ski                      |     |     | 3.0  |    |
| 1458140_at   | slit homolog 2 ( <i>Drosophila</i> )                                             | Slit2                    |     |     | 3.7  |    |
| 1452296_at   | slit homolog 3 ( <i>Drosophila</i> )                                             | Slit3                    |     |     | 2.1  |    |
| 1415895_at   | small nuclear ribonucleoprotein N /// SNRPN upstream reading frame               | Snrpn /// Snurf          |     |     | 2.1  |    |
| 1454703_x_at | small nucleolar RNA host gene (non-protein coding) 1                             | Snhg1                    |     |     | 2.6  |    |
| 1437658_a_at | small nucleolar RNA host gene (non-protein coding) 1                             | Snhg1                    |     |     | 2.7  |    |
| 1442497_at   | SMC hinge domain containing 1                                                    | Smchd1                   |     |     | 2.8  |    |
| 1457522_at   | SMEK homolog 1, suppressor of mek1 ( <i>Dictyostelium</i> )                      | Smek1                    |     |     | 2.7  |    |
| 1451797_at   | Smg-5 homolog, nonsense mediated mRNA decay factor ( <i>C. elegans</i> )         | Smg5                     |     |     | 2.7  |    |
| 1425883_at   | Smg-6 homolog, nonsense mediated mRNA decay factor ( <i>C. elegans</i> )         | Smg6                     |     |     | 4.7  |    |
| 1432043_at   | smu-1 suppressor of mec-8 and unc-52 homolog ( <i>C. elegans</i> )               | Smu1                     |     |     | 2.2  |    |
| 1420361_at   | solute carrier family 11                                                         | Slc11a1                  |     |     | 2.8  |    |
| 1418257_at   | solute carrier family 12, member 7                                               | Slc12a7                  |     |     | 2.2  |    |
| 1420697_at   | solute carrier family 15, member 3                                               | Slc15a3                  |     |     | 17.3 |    |
| 1429116_at   | solute carrier family 17 member 5                                                | Slc17a5                  |     |     | 2.1  |    |
| 1438824_at   | solute carrier family 20, member 1                                               | Slc20a1                  |     |     | 5.5  |    |
| 1420967_at   | solute carrier family 25 (mitochondrial carrier ornithine transporter), member 1 | Slc25a15                 |     |     | 2.2  |    |
| 1428440_at   | solute carrier family 25 (mitochondrial carrier, Aralar), member 12              | Slc25a12                 |     |     | 2.3  |    |
| 1429154_at   | solute carrier family 35, member F2                                              | LOC100048307 /// Slc35f2 |     |     | 2.8  |    |
| 1416637_at   | solute carrier family 4 (anion exchanger), member 2                              | Slc4a2                   |     |     | 2.8  |    |
| 1435420_at   | solute carrier family 4, sodium bicarbonate cotransporter, member 5              | Slc4a5                   |     |     | 2.0  |    |
| 1457528_at   | solute carrier family 4, sodium bicarbonate cotransporter, member 7              | Slc4a7                   |     |     | 3.1  |    |
| 1426663_s_at | solute carrier family 45, member 3                                               | Slc45a3                  |     |     | 2.4  |    |
| 1417929_at   | solute carrier family 7 (cationic amino acid transporter, y+ system), member 8   | Slc7a8                   |     |     | 4.5  |    |
| 1420952_at   | Son cell proliferation protein                                                   | Son                      |     |     | 2.2  |    |

| Probeset ID  | Gene Title                                                                   | Gene Symbol                   | 8mo | 60d | 21d  | 6d |
|--------------|------------------------------------------------------------------------------|-------------------------------|-----|-----|------|----|
| 1428471_at   | sorbin and SH3 domain containing 1                                           | Sorbs1                        |     |     | 2.8  |    |
| 1436737_a_at | sorbin and SH3 domain containing 1                                           | Sorbs1                        |     |     | 3.0  |    |
| 1423362_at   | sortilin 1                                                                   | Sort1                         |     |     | 2.3  |    |
| 1416359_at   | sorting nexin 18                                                             | Snx18                         |     |     | 2.7  |    |
| 1416008_at   | special AT-rich sequence binding protein 1                                   | Satb1                         |     |     | 3.8  |    |
| 1452407_at   | sperm associated antigen 4                                                   | Spag4                         |     |     | 2.5  |    |
| 1437676_at   | sperm associated antigen 9                                                   | Spag9                         |     |     | 5.0  |    |
| 1429817_at   | spermatogenesis and oogenesis specific basic helix-loop-helix 2              | Sohlh2                        |     |     | 2.4  |    |
| 1442456_at   | spermatogenesis associated 5                                                 | Spata5                        |     |     | 4.1  |    |
| 1421668_x_at | spermatogenesis associated glutamate (E)-rich protein 3                      | Speer3                        |     |     | 2.7  |    |
| 1429992_at   | spermatogenesis associated glutamate (E)-rich protein 4b                     | Speer4b                       |     |     | 4.6  |    |
| 1429993_s_at | spermatogenesis associated glutamate (E)-rich protein 4b                     | LOC100039045 /// Speer4b      |     |     | 4.5  |    |
| 1420791_x_at | spermatogenesis associated glutamate (E)-rich protein 4f                     | Speer4f                       |     |     | 4.6  |    |
| 1430008_x_at | spermatogenesis associated glutamate (E)-rich protein 5, pseudogene 1        | Speer5-ps1                    |     |     | 2.8  |    |
| 1417838_at   | spermiogenesis specific transcript on the Y 2                                | LOC100039209 /// LOC100039271 |     |     | 2.1  |    |
| 1416999_at   | sphingomyelin phosphodiesterase 2, neutral                                   | Smpd2                         |     |     | 3.3  |    |
| 1442079_at   | sphingomyelin synthase 1                                                     | Sgms1                         |     |     | 4.4  |    |
| 1418262_at   | spleen tyrosine kinase                                                       | Syk                           |     |     | 2.1  |    |
| 1441466_at   | splicing factor, arginine/serine-rich 10 (transformer 2 homolog, Drosophila) | Sfrs10                        |     |     | 3.0  |    |
| 1458056_at   | splicing factor, arginine/serine-rich 12                                     | Sfrs12                        |     |     | 4.7  |    |
| 1436005_at   | splicing factor, arginine/serine-rich 14                                     | Sfrs14                        |     |     | 2.4  |    |
| 1452885_at   | splicing factor, arginine/serine-rich 2, interacting protein                 | Sfrs2ip                       |     |     | 2.3  |    |
| 1436871_at   | splicing factor, arginine/serine-rich 7                                      | Sfrs7                         |     |     | 2.4  |    |
| 1438675_at   | splicing factor, arginine/serine-rich 8                                      | Sfrs8                         |     |     | 7.0  |    |
| 1451342_at   | spondin 1, (f-spondin) extracellular matrix protein                          | Spon1                         |     |     | 2.8  |    |
| 1440867_at   | sprouty homolog 4 (Drosophila)                                               | Spry4                         |     |     | 2.9  |    |
| 1445669_at   | sprouty homolog 4 (Drosophila)                                               | Spry4                         |     |     | 3.9  |    |
| 1437504_at   | Src-like-adaptor 2                                                           | Sla2                          |     |     | 2.1  |    |
| 1420903_at   | ST6 N-acetylgalactosaminide                                                  | St6galnac3                    |     |     | 2.8  |    |
| 1455695_at   | ST8 alpha-N-acetyl-neuraminide alpha-2,8-sialyltransferase 1                 | St8sia1                       |     |     | 2.0  |    |
| 1450199_a_at | stabilin 1                                                                   | Stab1                         |     |     | 2.9  |    |
| 1435113_x_at | stathmin-like 3                                                              | Stmn3                         |     |     | 3.2  |    |
| 1419092_a_at | STE20-like kinase (yeast)                                                    | Slk                           |     |     | 2.1  |    |
| 1433999_at   | STE20-like kinase (yeast)                                                    | Slk                           |     |     | 2.6  |    |
| 1430058_at   | stem-loop binding protein                                                    | Slbp                          |     |     | 4.2  |    |
| 1460603_at   | sterile alpha motif domain containing 9-like                                 | Samd9l                        |     |     | 2.6  |    |
| 1452174_at   | sterol regulatory element binding factor 2                                   | Srebfb2                       |     |     | 2.7  |    |
| 1448774_at   | stomatin (Epb7.2)-like 2                                                     | Stoml2                        |     |     | 2.4  |    |
| 1441266_at   | Striatin, calmodulin binding protein 3                                       | Strn3                         |     |     | 4.0  |    |
| 1426270_at   | structural maintenance of chromosomes 5                                      | Smc5                          |     |     | 2.0  |    |
| 1436319_at   | sulfatase 1                                                                  | Sulf1                         |     |     | 2.1  |    |
| 1433714_at   | sulfotransferase family 4A, member 1                                         | Sult4a1                       |     |     | 2.2  |    |
| 1445387_at   | SUMO/sentrin specific peptidase 6                                            | Senp6                         |     |     | 10.6 |    |
| 1440222_at   | superoxide dismutase 1, soluble                                              | Sod1                          |     |     | 2.8  |    |
| 1433374_at   | suppressor of Ty 7 (S. cerevisiae)-like                                      | Supt7l                        |     |     | 2.1  |    |
| 1428460_at   | synapsin II                                                                  | Syn2                          |     |     | 2.4  |    |

| Probeset ID  | Gene Title                                                          | Gene Symbol            | 8mo | 60d | 21d | 6d |
|--------------|---------------------------------------------------------------------|------------------------|-----|-----|-----|----|
| 1442285_at   | synaptic nuclear envelope 2                                         | Syne2                  |     |     | 2.4 |    |
| 1417081_a_at | synaptogyrin 2                                                      | Syngn2                 |     |     | 2.5 |    |
| 1448577_x_at | synaptogyrin 2                                                      | Syngn2                 |     |     | 2.2 |    |
| 1416828_at   | synaptosomal-associated protein 25                                  | Snapt25                |     |     | 4.2 |    |
| 1449912_at   | synovial sarcoma, X member B, breakpoint 1                          | LOC100044599 /// Ssxb1 |     |     | 3.2 |    |
| 1455513_at   | TAF1 RNA polymerase II associated factor                            | Taf1                   |     |     | 2.3 |    |
| 1438130_at   | TAF15 RNA polymerase II associated factor                           | Taf15                  |     |     | 2.8 |    |
| 1456975_at   | TAO kinase 1                                                        | Taok1                  |     |     | 5.8 |    |
| 1438513_at   | TatD DNase domain containing 1                                      | Tatdn1                 |     |     | 2.6 |    |
| 1430808_at   | TBC1 domain family, member 5                                        | Tbc1d5                 |     |     | 6.2 |    |
| 1455015_at   | TBC1 domain family, member 9                                        | Tbc1d9                 |     |     | 2.6 |    |
| 1443527_at   | telomeric repeat binding factor 1                                   | Terf1                  |     |     | 4.0 |    |
| 1439739_at   | testes-specific protease 50                                         | LOC100047259 /// Tsp50 |     |     | 2.4 |    |
| 1417482_at   | testis expressed gene 19                                            | Tex19                  |     |     | 2.4 |    |
| 1428197_at   | tetraspanin 9                                                       | Tspan9                 |     |     | 2.1 |    |
| 1437709_x_at | tetratricopeptide repeat domain 13                                  | Ttc13                  |     |     | 2.1 |    |
| 1441684_at   | tetratricopeptide repeat domain 3                                   | Ttc3                   |     |     | 3.0 |    |
| 1460077_at   | tetratricopeptide repeat domain 3                                   | Ttc3                   |     |     | 3.5 |    |
| 1417316_at   | thioesterase superfamily member 2                                   | Them2                  |     |     | 2.5 |    |
| 1415996_at   | thioredoxin interacting protein                                     | Txnip                  |     |     | 2.6 |    |
| 1431044_at   | THO complex 1                                                       | Thoc1                  |     |     | 2.7 |    |
| 1448529_at   | thrombomodulin                                                      | Thbd                   |     |     | 3.4 |    |
| 1450663_at   | thrombospondin 2                                                    | Thbs2                  |     |     | 2.0 |    |
| 1416623_at   | thrombospondin 3                                                    | Thbs3                  |     |     | 2.2 |    |
| 1452125_at   | thyroid hormone receptor associated protein 3                       | Thrap3                 |     |     | 5.5 |    |
| 1450371_at   | thyroid stimulating hormone, beta subunit                           | Tshb                   |     |     | 3.6 |    |
| 1418587_at   | Tnf receptor-associated factor 3                                    | Traf3                  |     |     | 2.5 |    |
| 1457676_at   | toll-interleukin 1 receptor (TIR) domain-containing adaptor protein | Tirap                  |     |     | 2.1 |    |
| 1449049_at   | toll-like receptor 1                                                | Tlr1                   |     |     | 2.1 |    |
| 1422782_s_at | toll-like receptor 3                                                | Tlr3                   |     |     | 6.7 |    |
| 1416731_at   | topoisomerase (DNA) II beta                                         | Top2b                  |     |     | 2.4 |    |
| 1460002_at   | tousled-like kinase 1 /// similar to tousled-like kinase 1          | LOC100046241 /// Tlk1  |     |     | 2.7 |    |
| 1439619_at   | transcription factor 12                                             | Tcf12                  |     |     | 4.6 |    |
| 1433471_at   | transcription factor 7, T-cell specific                             | Tcf7                   |     |     | 2.5 |    |
| 1455109_at   | transducin (beta)-like 1X-linked receptor 1                         | Tbl1xr1                |     |     | 2.0 |    |
| 1448727_at   | transducin-like enhancer of split 6, homolog of Drosophila E(spl)   | Tle6                   |     |     | 2.3 |    |
| 1416532_at   | transformation/transcription domain-associated protein              | Trrap                  |     |     | 3.2 |    |
| 1456671_at   | transforming growth factor beta regulated gene 3                    | Tbrg3                  |     |     | 5.0 |    |
| 1433795_at   | transforming growth factor, beta receptor III                       | Tgfb3                  |     |     | 2.4 |    |
| 1455834_x_at | transforming, acidic coiled-coil containing protein 3               | Tacc3                  |     |     | 2.7 |    |
| 1430485_at   | transient receptor potential cation channel, subfamily C, member 2  | Trpc2                  |     |     | 2.6 |    |
| 1431355_s_at | transient receptor potential cation channel, subfamily M, member 7  | Trpm7                  |     |     | 4.1 |    |
| 1451268_at   | translocation associated membrane protein 1-like 1                  | Tram111                |     |     | 2.7 |    |
| 1424445_at   | transmembrane 4 superfamily member 5                                | Tm4sf5                 |     |     | 2.9 |    |
| 1451692_at   | transmembrane and coiled-coil domains 6                             | Tmco6                  |     |     | 2.0 |    |
| 1428113_at   | transmembrane and tetratricopeptide repeat containing 4             | Tmtc4                  |     |     | 2.2 |    |

|              |                                                                           |                         |      |
|--------------|---------------------------------------------------------------------------|-------------------------|------|
| 1460128_at   | Transmembrane emp24 domain trafficking protein 2                          | Tmed2                   | 2.0  |
| 1438698_at   | transmembrane protein 132C                                                | Tmem132c                | 6.3  |
| 1454741_s_at | transmembrane protein 164                                                 | Tmem164                 | 2.1  |
| 1433854_at   | Transmembrane protein 164                                                 | Tmem164                 | 3.8  |
| 1439726_at   | transmembrane protein 186                                                 | Tmem186                 | 2.6  |
| 1438010_at   | transmembrane protein 201                                                 | Tmem201                 | 2.5  |
| 1436698_x_at | transmembrane protein 204                                                 | Tmem204                 | 2.5  |
| 1438082_at   | transmembrane protein 206                                                 | Tmem206                 | 2.2  |
| 1421904_at   | trimethylguanosine synthase homolog (S. cerevisiae)                       | Tgs1                    | 2.1  |
| 1446164_at   | Trimethylguanosine synthase homolog (S. cerevisiae)                       | Tgs1                    | 3.8  |
| 1455141_at   | trinucleotide repeat containing 6a                                        | Tnrc6a                  | 2.1  |
| 1439244_a_at | trinucleotide repeat containing 6a                                        | Tnrc6a                  | 2.3  |
| 1434898_at   | trinucleotide repeat containing 6a                                        | Tnrc6a                  | 3.1  |
| 1436982_at   | trinucleotide repeat containing 6b                                        | Tnrc6b                  | 3.3  |
| 1448940_at   | tripartite motif-containing 21 /// similar to Tripartite motif protein 21 | LOC100045519 /// Trim21 | 2.1  |
| 1418077_at   | tripartite motif-containing 21 /// similar to Tripartite motif protein 21 | LOC100045519 /// Trim21 | 2.6  |
| 1429998_at   | tripartite motif-containing 23                                            | Trim23                  | 2.6  |
| 1446295_at   | tripartite motif-containing 24                                            | Trim24                  | 10.7 |
| 1419879_s_at | tripartite motif-containing 25                                            | Trim25                  | 3.2  |
| 1425974_a_at | tripartite motif-containing 25                                            | Trim25                  | 3.2  |
| 1426093_at   | tripartite motif-containing 34                                            | Trim34                  | 2.5  |
| 1431430_s_at | tripartite motif-containing 59 /// similar to mouse RING finger 1         | LOC630539 /// Trim59    | 3.8  |
| 1430576_at   | tripeptidyl peptidase II                                                  | Tpp2                    | 8.5  |
| 1424489_a_at | tRNA isopentenyltransferase 1                                             | Trit1                   | 2.0  |
| 1425281_a_at | TSC22 domain family 3                                                     | Tsc22d3                 | 2.0  |
| 1420772_a_at | TSC22 domain family 3                                                     | Tsc22d3                 | 2.6  |
| 1420925_at   | tubby candidate gene                                                      | Tub                     | 2.1  |
| 1431309_at   | tubulin tyrosine ligase-like family, member 10                            | Ttll10                  | 3.8  |
| 1455719_at   | tubulin, beta 5                                                           | Tubb5                   | 2.5  |
| 1457282_x_at | Tubulin, gamma complex associated protein 5                               | Tubgcp5                 | 4.1  |
| 1439680_at   | tumor necrosis factor (ligand) superfamily, member 10                     | Tnfsf10                 | 2.7  |
| 1418733_at   | twist gene homolog 1 (Drosophila)                                         | Twist1                  | 2.2  |
| 1450388_s_at | twisted gastrulation homolog 1 (Drosophila)                               | Twsg1                   | 2.0  |
| 1457249_at   | Ubiquitin associated protein 2-like                                       | Ubp2l                   | 6.9  |
| 1429515_at   | ubiquitin protein ligase E3 component n-recognin 2                        | Ubr2                    | 2.7  |
| 1426539_at   | ubiquitin specific peptidase 11                                           | Usp11                   | 3.2  |
| 1418191_at   | ubiquitin specific peptidase 18                                           | LOC100048346 /// Usp18  | 3.7  |
| 1453190_at   | ubiquitin specific peptidase 19                                           | Usp19                   | 3.2  |
| 1455237_at   | ubiquitin specific peptidase 36                                           | Usp36                   | 2.7  |
| 1442319_at   | ubiquitin specific peptidase 4 (proto-oncogene)                           | Usp4                    | 2.3  |
| 1426700_a_at | ubiquitin specific peptidase 52                                           | Usp52                   | 2.3  |
| 1458899_at   | ubiquitin specific peptidase 53                                           | Usp53                   | 6.1  |
| 1438249_at   | ubiquitin specific peptidase 7                                            | Usp7                    | 4.6  |
| 1452509_at   | ubiquitin specific peptidase 9, Y chromosome                              | Usp9y                   | 2.9  |
| 1450285_at   | ubiquitin-activating enzyme E1, Chr Y 1                                   | LOC100039202 ///Ube1y1  | 2.0  |
| 1427543_s_at | ubiquitin-activating enzyme E1, Chr Y 1                                   | LOC100039202 ///Ube1y1  | 2.1  |
| 1439477_at   | ubiquitin-conjugating enzyme E2B, RAD6 homolog (S. cerevisiae)            | Ube2b                   | 2.8  |

| Probeset ID  | Gene Title                                                               | Gene Symbol               | 8mo | 60d | 21d | 6d |
|--------------|--------------------------------------------------------------------------|---------------------------|-----|-----|-----|----|
| 1447217_at   | ubiquitin-like, containing PHD and RING finger domains 2                 | Uhrf2                     |     |     | 3.9 |    |
| 1445198_at   | ubiquitously transcribed tetratricopeptide repeat gene, X chromosome     | Utx                       |     |     | 3.5 |    |
| 1460509_at   | UDP-Gal:betaGlcNAc beta 1,3-galactosyltransferase, polypeptide 1         | B3galt1                   |     |     | 2.8 |    |
| 1455234_at   | UDP-Gal:betaGlcNAc beta 1,3-galactosyltransferase, polypeptide 1         | B3galt1                   |     |     | 3.4 |    |
| 1455839_at   | UDP-glucose ceramide glucosyltransferase-like 1                          | LOC100044322 /// Ugcg1    |     |     | 2.4 |    |
| 1429836_at   | UDP-glucose ceramide glucosyltransferase-like 2                          | Ugcg12                    |     |     | 2.1 |    |
| 1452182_at   | UDP-N-acetylgalactosaminyltransferase                                    | Galnt2                    |     |     | 2.3 |    |
| 1415866_at   | unc-45 homolog A (C. elegans)                                            | Unc45a                    |     |     | 2.4 |    |
| 1455912_x_at | Unc-45 homolog A (C. elegans)                                            | Unc45a                    |     |     | 2.6 |    |
| 1436939_at   | unc-45 homolog B (C. elegans)                                            | Unc45b                    |     |     | 2.5 |    |
| 1448370_at   | Unc-51 like kinase 1 (C. elegans)                                        | Ulk1                      |     |     | 2.5 |    |
| 1439591_at   | Unc-51 like kinase 2 (C. elegans)                                        | Ulk2                      |     |     | 6.2 |    |
| 1428565_at   | unkempt-like (Drosophila)                                                | Unkl                      |     |     | 2.2 |    |
| 1445777_at   | UPF2 regulator of nonsense transcripts homolog (yeast)                   | Upf2                      |     |     | 2.1 |    |
| 1460655_a_at | upstream binding protein 1                                               | Ubp1                      |     |     | 2.4 |    |
| 1455222_a_at | upstream binding protein 1                                               | Ubp1                      |     |     | 2.6 |    |
| 1450607_s_at | urocortin 2                                                              | Ucn2                      |     |     | 2.7 |    |
| 1452252_at   | UTP20, small subunit (SSU) processome component, homolog (yeast)         | Utp20                     |     |     | 2.4 |    |
| 1456810_at   | vacuolar protein sorting 54 (yeast)                                      | Vps54                     |     |     | 4.2 |    |
| 1439943_at   | vacuolar protein sorting 54 (yeast)                                      | Vps54                     |     |     | 9.0 |    |
| 1442251_at   | valosin containing protein (p97)/p47 complex interacting protein 1       | Vcpi1                     |     |     | 4.3 |    |
| 1436118_at   | vang-like 2 (van gogh, Drosophila)                                       | Vangl2                    |     |     | 2.9 |    |
| 1451097_at   | vasodilator-stimulated phosphoprotein                                    | Vasp                      |     |     | 3.8 |    |
| 1417122_at   | vav 3 oncogene                                                           | Vav3                      |     |     | 2.0 |    |
| 1434606_at   | v-erb-b2 erythroblastic leukemia viral oncogene homolog 3 (avian)        | ErbB3                     |     |     | 4.3 |    |
| 1451716_at   | v-maf musculoaponeurotic fibrosarcoma oncogene family, protein B (avian) | Mafb                      |     |     | 2.2 |    |
| 1434054_at   | v-maf musculoaponeurotic fibrosarcoma oncogene family, protein G (avian) | Mafg                      |     |     | 2.4 |    |
| 1446876_at   | WD repeat domain 22                                                      | Wdr22                     |     |     | 2.1 |    |
| 1435478_at   | WD repeat domain 26                                                      | Wdr26                     |     |     | 2.1 |    |
| 1451754_a_at | WD repeat domain 45                                                      | Wdr45                     |     |     | 2.1 |    |
| 1424786_s_at | WD repeat domain 45                                                      | Wdr45                     |     |     | 2.0 |    |
| 1439664_at   | WD repeat domain 68                                                      | Wdr68                     |     |     | 2.1 |    |
| 1426767_at   | WD repeat domain 90                                                      | Wdr90                     |     |     | 3.7 |    |
| 1453113_at   | WD repeat, SAM and U-box domain containing 1                             | Wdsub1                    |     |     | 2.1 |    |
| 1442426_at   | wings apart-like homolog (Drosophila)                                    | Wapal                     |     |     | 3.3 |    |
| 1448594_at   | WNT1 inducible signaling pathway protein 1                               | Wisp1                     |     |     | 3.1 |    |
| 1457794_at   | Wolf-Hirschhorn syndrome candidate 1-like 1 (human)                      | Whsc111                   |     |     | 3.6 |    |
| 1433651_at   | WT1-interacting protein                                                  | Wtip                      |     |     | 2.6 |    |
| 1437426_at   | WW domain containing adaptor with coiled-coil                            | Wvac                      |     |     | 7.1 |    |
| 1420008_s_at | WW, C2 and coiled-coil domain containing 1                               | Wwc1                      |     |     | 2.3 |    |
| 1420009_at   | WW, C2 and coiled-coil domain containing 1                               | Wwc1                      |     |     | 2.3 |    |
| 1422532_at   | xeroderma pigmentosum, complementation group C                           | Xpc                       |     |     | 2.1 |    |
| 1420357_s_at | X-linked lymphocyte-regulated 3A                                         | LOC100044094 /// Xlr3a    |     |     | 2.5 |    |
| 1422933_at   | X-linked lymphocyte-regulated 5C                                         | Xlr5a /// Xlr5b /// Xlr5c |     |     | 2.1 |    |
| 1434278_at   | X-linked myotubular myopathy gene 1                                      | Mtm1                      |     |     | 3.1 |    |
| 1456843_at   | Yamaguchi sarcoma viral (v-yes) oncogene homolog 1                       | Yes1                      |     |     | 4.8 |    |

| Probeset ID  | Gene Title                                         | Gene Symbol       | 8mo | 60d | 21d  | 6d |
|--------------|----------------------------------------------------|-------------------|-----|-----|------|----|
| 1451318_a_at | Yamaguchi sarcoma viral (v-yes-1) oncogene homolog | LOC676654 /// Lyn |     |     | 4.3  |    |
| 1426624_a_at | yippee-like 3 (Drosophila)                         | Ypel3             |     |     | 2.9  |    |
| 1434501_at   | yippee-like 4 (Drosophila)                         | Ypel4             |     |     | 4.9  |    |
| 1457514_at   | YLP motif containing 1                             | Ylpm1             |     |     | 7.6  |    |
| 1437822_at   | YME1-like 1 (S. cerevisiae)                        | Yme111            |     |     | 4.2  |    |
| 1437598_at   | zinc finger and BTB domain containing 20           | Zbtb20            |     |     | 2.8  |    |
| 1455193_at   | zinc finger and BTB domain containing 8            | Zbtb8             |     |     | 3.2  |    |
| 1430568_at   | zinc finger CCCH type containing 13                | Zc3h13            |     |     | 2.2  |    |
| 1445499_at   | zinc finger CCCH type containing 13                | Zc3h13            |     |     | 2.3  |    |
| 1455547_at   | zinc finger CCCH type containing 7B                | Zc3h7b            |     |     | 2.2  |    |
| 1418495_at   | zinc finger CCCH type containing 8                 | Zc3h8             |     |     | 2.1  |    |
| 1446512_at   | zinc finger CCCH-type containing 15                | Zc3h15            |     |     | 2.4  |    |
| 1446127_at   | Zinc finger E-box binding homeobox 1               | Zeb1              |     |     | 10.2 |    |
| 1449978_at   | zinc finger protein 2, Y linked                    | Zfy2              |     |     | 2.1  |    |
| 1438515_at   | zinc finger protein 207                            | Zfp207            |     |     | 3.8  |    |
| 1430216_at   | zinc finger protein 292                            | Zfp292            |     |     | 2.1  |    |
| 1436308_at   | zinc finger protein 292                            | Zfp292            |     |     | 3.3  |    |
| 1419574_at   | zinc finger protein 292                            | Zfp292            |     |     | 3.6  |    |
| 1419575_s_at | zinc finger protein 292                            | Zfp292            |     |     | 3.7  |    |
| 1452519_a_at | zinc finger protein 36                             | Zfp36             |     |     | 2.5  |    |
| 1450644_at   | zinc finger protein 36, C3H type-like 1            | Zfp3611           |     |     | 2.1  |    |
| 1437626_at   | zinc finger protein 36, C3H type-like 2            | Zfp3612           |     |     | 2.1  |    |
| 1433583_at   | zinc finger protein 365                            | Zfp365            |     |     | 6.2  |    |
| 1458003_at   | zinc finger protein 398                            | Zfp398            |     |     | 2.5  |    |
| 1439945_at   | zinc finger protein 449                            | Zfp449            |     |     | 3.7  |    |
| 1456789_at   | zinc finger protein 462                            | Zfp462            |     |     | 3.3  |    |
| 1460620_at   | zinc finger protein 592                            | Zfp592            |     |     | 2.3  |    |
| 1434720_at   | zinc finger protein 652                            | Zfp652            |     |     | 2.3  |    |
| 1459979_x_at | Zinc finger protein 68                             | Zfp68             |     |     | 2.0  |    |
| 1435168_at   | zinc finger protein 710                            | Zfp710            |     |     | 3.9  |    |
| 1453013_at   | zinc finger protein 740                            | Zfp740            |     |     | 2.0  |    |
| 1455786_at   | zinc finger protein 820                            | Zfp820            |     |     | 2.3  |    |
| 1425775_at   | zinc finger protein 820                            | Zfp820            |     |     | 3.1  |    |
| 1418291_at   | zinc finger protein 87                             | Zfp87             |     |     | 2.2  |    |
| 1459444_at   | zinc finger protein 91                             | Zfp91             |     |     | 3.8  |    |
| 1444096_at   | Zinc finger RNA binding protein                    | Zfr               |     |     | 2.8  |    |
| 1458450_at   | zinc finger RNA binding protein                    | Zfr               |     |     | 4.3  |    |
| 1442311_at   | Zinc finger RNA binding protein                    | Zfr               |     |     | 4.8  |    |
| 1435407_at   | Zinc finger with KRAB and SCAN domains 16          | Zkscan16          |     |     | 3.0  |    |
| 1439631_at   | zinc finger, CCHC domain containing 11             | Zcchc11           |     |     | 3.6  |    |
| 1441359_at   | zinc finger, CCHC domain containing 11             | Zcchc11           |     |     | 8.0  |    |
| 1441545_at   | zinc finger, CCHC domain containing 11             | Zcchc11           |     |     | 10.5 |    |
| 1460048_at   | Zinc finger, DHHC domain containing 13             | Zdhhc13           |     |     | 3.3  |    |
| 1438619_x_at | zinc finger, DHHC domain containing 14             | Zdhhc14           |     |     | 2.7  |    |
| 1431218_at   | zinc finger, DHHC domain containing 20             | Zdhhc20           |     |     | 4.4  |    |
| 1433959_at   | zinc finger, matrin type 4                         | Zmat4             |     |     | 3.0  |    |

| <b>Probeset ID</b> | <b>Gene Title</b>                      | <b>Gene Symbol</b> | <b>8mo</b> | <b>60d</b> | <b>21d</b> | <b>6d</b> |
|--------------------|----------------------------------------|--------------------|------------|------------|------------|-----------|
| 1458523_at         | zinc finger, matrin-like               | Zfml               |            |            | 2.5        |           |
| 1459818_x_at       | zinc finger, MYM-type 3                | Zmym3              |            |            | 2.3        |           |
| 1417794_at         | zinc finger, MYM-type 3                | Zmym3              |            |            | 3.2        |           |
| 1432001_at         | zinc finger, MYND domain containing 17 | Zmynd17            |            |            | 2.7        |           |
| 1421614_at         | zonadhesin                             | Zan                |            |            | 3.0        |           |
| 1433869_at         | ZXD family zinc finger C               | Zxdc               |            |            | 2.2        |           |
| 1435754_at         | zyg-II homolog B (C. elegans)          | Zyg11b             |            |            | 2.9        |           |
